# Supplementary material for: Evolving rifampicin and isoniazid mono-resistance in a high multidrug-resistant and extensively drug-resistant tuberculosis region: a retrospective data analysis
Source: PubMed Central journal article supplement — BMJ Open. 2019 Nov 6;9(11):e031663. doi: 10.1136/bmjopen-2019-031663 (PMC6858147; doi:10.1136/bmjopen-2019-031663), 2019-11-06
Supplement: bmjopen-2019-031663.draft_revisions.pdf [file bmjopen-2019-031663.draft_revisions.pdf]

# BMJ Open

BMJ Open is committed to open peer review. As part of this commitment we make the peer review history of every article we publish publicly available.

When an article is published we post the peer reviewers' comments and the authors' responses online. We also post the versions of the paper that were used during peer review. These are the versions that the peer review comments apply to.

The versions of the paper that follow are the versions that were submitted during the peer review process. They are not the versions of record or the final published versions. They should not be cited or distributed as the published version of this manuscript.

BMJ Open is an open access journal and the full, final, typeset and author-corrected version of record of the manuscript is available on our site with no access controls, subscription charges or pay-per-view fees (<http://bmjopen.bmj.com>).

If you have any questions on BMJ Open's open peer review process please email [info.bmjopen@bmj.com](mailto:info.bmjopen@bmj.com)

# BMJ Open

## **Evolving rifampicin and isoniazid mono-resistance in a high MDR and XDR TB region: a retrospective data analysis**

|                               |                                                                                                                                                                                     |
|-------------------------------|-------------------------------------------------------------------------------------------------------------------------------------------------------------------------------------|
| Journal:                      | <i>BMJ Open</i>                                                                                                                                                                     |
| Manuscript ID                 | bmjopen-2019-031663                                                                                                                                                                 |
| Article Type:                 | Research                                                                                                                                                                            |
| Date Submitted by the Author: | 14-May-2019                                                                                                                                                                         |
| Complete List of Authors:     | Mvelase, Nomonde; National Health Laboratory Service, Medical Microbiology<br>Balakrishna, Yusentha<br>Lutchminarain, Keeren<br>Mlisana, Koleka                                     |
| Keywords:                     | Tuberculosis < INFECTIOUS DISEASES, Public health < INFECTIOUS DISEASES, Health policy < HEALTH SERVICES ADMINISTRATION & MANAGEMENT, Diagnostic microbiology < INFECTIOUS DISEASES |
|                               |                                                                                                                                                                                     |

SCHOLARONE™  
Manuscripts

1  
2  
3 **Evolving rifampicin and isoniazid mono-resistance in a high MDR and XDR TB region:**  
4  
5 **a retrospective data analysis**  
6  
7

8 N. R. Mvelase <sup>1,2</sup>, Y. Balakrishna <sup>3</sup>, K. Lutchminarain <sup>1,2</sup>, K. P. Mlisana <sup>1,2,4</sup>  
9

10  
11 <sup>1</sup>Department of Medical Microbiology, KwaZulu-Natal Academic Complex, National Health  
12 Laboratory Service, Durban, South Africa  
13  
14

15  
16  
17 <sup>2</sup>Department of Medical Microbiology, School of Laboratory Medicine & Medical Sciences,  
18 University of KwaZulu-Natal, Durban, South Africa  
19  
20

21  
22 <sup>3</sup>Biostatistics Unit, South African Medical Research Council, Durban, South Africa  
23  
24

25  
26 <sup>4</sup>Centre for the AIDS Programme of Research in South Africa (CAPRISA), University of  
27 KwaZulu-Natal, Durban, South Africa  
28  
29

30  
31  
32  
33  
34 Corresponding author: Nomonde R. Mvelase  
35

36  
37 Address: KwaZulu-Natal National Health Laboratory Service, Department of Medical  
38 Microbiology, Level 4, Laboratory Building, IALCH, Durban, South Africa  
39  
40

41  
42 Email: dlamini15@ukzn.ac.za  
43  
44

45  
46 Running Title: Drug resistant TB in KwaZulu-Natal  
47  
48  
49  
50  
51  
52  
53  
54  
55  
56  
57  
58  
59  
60

## Abstract

**Objectives:** South Africa ranks among the highest drug resistant tuberculosis burdened countries in the world. This study assessed the changes in resistance levels in culture confirmed *Mycobacterium tuberculosis* (MTB) in the highest burdened province of South Africa during a period where major changes in diagnostic algorithm were implemented.

**Setting:** This study was conducted at the central academic laboratory of the KwaZulu-Natal province of South Africa.

**Participants:** We analysed data for all MTB cultures performed in the KwaZulu-Natal province between 2011 and 2014. The data were collected from the laboratory information system.

**Results:** Out of 88 559 drug susceptibility results analysed, 18352 (20.7%) were resistant to rifampicin and 19190 (21.7%) showed resistance to isoniazid. The proportion of rifampicin resistant cases that were mono-resistant increased from 15.3% in 2011 to 21.4% in 2014 while INH mono-resistance showed a range between 13.8% and 21.1%. The MDR TB rates increased from 18.8% to 23.9% and the proportion of MDR TB cases that had XDR TB remained between 10.2% and 11.1%. Most drug resistance was found in females between the ages of 15 to 44 years and the northern districts bordering high MDR TB regions had the highest MDR TB rates.

**Conclusion:** Our findings show increasing rifampicin mono-resistance and a substantial amount of INH mono-resistance. This highlights a need for an initial test that detects resistance to both these drugs so as to avoid using rifampicin monotherapy during continuous phase of treatment in patients with INH mono-resistance. Furthermore, addition of isoniazid will benefit patients with rifampicin mono-resistance. Although DR TB is widespread, HIV

1  
2  
3 24 and migration influence its distribution; therefore, TB control strategies should include  
4  
5 25 interventions that target these aspects.  
6  
7  
8  
9 26

#### Strengths and limitations of this study

- The study was performed in the country with the highest TB incidence rate and a largest HIV epidemic in the world.
- The analysed data involves a period of major shift in TB diagnostic algorithm.
- The patient level Xpert MTB/RIF data was not available in order to compare with the TB culture results.
- The absence of unique patient identifiers also affects the accuracy of the data as the removal of duplicates was imperfect.

#### Background

27  
28  
29 The World Health Organisation (WHO) has declared multidrug resistant tuberculosis (MDR  
30 TB) a global crisis. Despite the decline in the global incidence rates of tuberculosis (TB), drug  
31 resistant TB cases are on the rise with 600 000 estimated incident cases of MDR plus rifampicin  
32 resistant (RR) TB and more than 240 000 deaths in 2016 [1]. South Africa has the highest  
33 incidence of TB in the world which WHO estimated to be 781 per 100 000 in 2016 [1]. In 2016  
34 alone, South Africa had an estimated number of 19 000 rifampicin resistant cases, the second  
35 highest number in Africa after Nigeria which has more than three times the South African  
36 population [1]. Moreover, the first reported outbreak of extensively drug-resistant tuberculosis  
37 (XDR TB) which caused global concern in 2005 was from the province of KwaZulu-Natal  
38 (KZN) in South Africa [2]. While the incidence of TB in KZN is proportional to other provinces

1  
2  
3 39 in the country, it remains the highest drug resistant (DR) TB burdened province with almost a  
4  
5 40 third of the country's cases of drug resistant TB [3].  
6  
7  
8 41

9  
10 42 Compounding the problem of TB in South Africa, is the high rate of co-infection with HIV  
11  
12 43 (about 60%) [1]. While it is well known that HIV is associated with smear negative TB, smear  
13  
14 44 microscopy was traditionally used in the initial diagnosis of TB because of its quick time to  
15  
16 45 results and low cost [4]. On the other hand, conventional TB culture is much more sensitive  
17  
18 46 than smear microscopy, but its high cost, complexity and long delays in getting the results  
19  
20 47 made it impractical for routine diagnosis of TB. Therefore, when the WHO endorsed the Xpert  
21  
22 48 MTB/RIF (Cepheid GeneXpert, Sunnyvale, Ca, USA) in 2010, it was subsequently introduced  
23  
24 49 in South Africa in 2011. The Xpert MTB/RIF (Xpert) is an automated nucleic acid  
25  
26 50 amplification test that offers better detection of TB compared to smear microscopy with an  
27  
28 51 added advantage of the ability to detect rifampicin resistance in less than two hours in clinical  
29  
30 52 specimens [5-6].  
31  
32  
33  
34  
35 53

36  
37 54 The implementation of Xpert in South Africa completely changed the testing algorithm for the  
38  
39 55 diagnosis of TB [7]. Xpert replaced smear microscopy in the initial diagnosis of TB and all  
40  
41 56 patients that do not demonstrate rifampicin resistance are assumed to have drug susceptible TB  
42  
43 57 and therefore initiated on standard first line TB therapy. Thus, Xpert rifampicin susceptible  
44  
45 58 cases do not get a culture, so isoniazid mono-resistance is not routinely investigated. TB culture  
46  
47 59 and drug susceptibility testing (DST) is only indicated for patients that demonstrate rifampicin  
48  
49 60 resistance on the Xpert, paucibacillary TB cases missed by Xpert (HIV infected, children and  
50  
51 61 extra-pulmonary TB) and patients that fail TB treatment.  
52  
53  
54  
55  
56 62

1  
2  
3 63 Despite the recent changes in the diagnosis and management of TB, there are no studies that  
4  
5 64 have assessed their impact on culture confirmed TB. The level of isoniazid mono-resistance  
6  
7  
8 65 that is not routinely investigated with current diagnostic methods is unknown, but instead these  
9  
10 66 patients are getting rifampicin monotherapy during the continuous phase of their first line TB  
11  
12 67 therapy which could potentially fuel drug resistance. On the other hand, patients with  
13  
14 68 rifampicin mono-resistance can benefit from the addition of isoniazid in their treatment. We  
15  
16  
17 69 therefore undertook this study to evaluate the amount of rifampicin and isoniazid mono-  
18  
19 70 resistance, so as to ensure optimal and appropriate diagnostic algorithms. We also describe the  
20  
21 71 drug resistance patterns and distribution among different age groups, genders and districts in  
22  
23  
24 72 KZN, South Africa. Understanding the patterns and distributions of drug resistant TB will  
25  
26 73 inform targeted intervention in TB control in this high TB endemic region.  
27  
28  
29 74  
30  
31

## 32 75 **Methods**

### 33 34 35 76 **Study design**

36  
37  
38 77 The study is a retrospective observational study using laboratory data for 2011 till 2014.  
39  
40  
41 78

### 42 43 79 **Study setting**

44  
45 80 The KZN province is one of nine provinces in South Africa and its population of just over 10  
46  
47 81 million ranks second in the country. There are 77 public health hospitals (including 8 MDR TB  
48  
49 82 initiation sites) within 11 health districts. Provincial *Mycobacterium tuberculosis* culture and  
50  
51 83 drug susceptibility testing are performed in one central academic laboratory.  
52  
53  
54  
55 84

### 56 57 85 **Laboratory Procedures**

58  
59  
60

1  
2  
3 86 MTB isolation from clinical samples was routinely done using the automated BACTEC  
4  
5 87 mycobacteria growth indication tubes (MGIT) 960 system (BACTEC MGIT Becton  
6  
7  
8 88 Dickinson, USA). Indirect line probe assay (LPA) [GenoType MTBDRplus assay, Hain  
9  
10 89 Lifescience, Nehren, Germany] was performed on all positive MGIT cultures using standard  
11  
12 90 methods. Thereafter, additional DST for isoniazid (INH), rifampicin (RIF), ofloxacin,  
13  
14 91 streptomycin, kanamycin was performed for all cases with resistance to rifampicin or isoniazid  
15  
16 92 on the LPA using 1% agar proportion method (APM) on Middlebrook 7H10.  
17  
18  
19  
20  
21  
22

### 23 94 **Patient and public involvement**

24 95 The data used for this study was the routine TB diagnostic data, therefore there was no direct  
25  
26 96 patient and public involvement.  
27  
28  
29  
30

### 31 98 **Data collection and analysis**

32  
33 99 The TB culture and DST data was collected from the National Health Laboratory Service  
34  
35 100 laboratory information system (LIS) which contains all electronic laboratory results. In the  
36  
37 101 absence of a unique identifier, duplicates were removed using demographic data. The results  
38  
39 102 were stratified according to the health districts, age and gender. For the analysis of age, cases  
40  
41 103 without recorded age or date of birth were excluded.  
42  
43  
44  
45  
46

47 105 Data was described using frequencies and proportions. Continuous data was described using  
48  
49 106 means and standard deviations (sd). Categorical outcomes were tested using the chi-squared  
50  
51 107 test. Log binomial regression of MDR and XDR TB was performed using sex, age group,  
52  
53 108 district and year as predictors to estimate the adjusted relative risk ratios. Data was analysed  
54  
55 109 using Stata 14 (StataCorp., College Station, TX, USA).  
56  
57  
58  
59  
60



### 111 **Ethical consideration**

112 The data used for the study is routine data for management of TB patients; therefore, no  
113 individual patient consent was required. The ethical approval to perform the retrospective  
114 analysis was obtained from the Biomedical Research Ethics Committee of the University of  
115 KwaZulu-Natal (REF: BE085/12).

### 117 **Results**

118 Between 2011 and 2014, a total of 951 209 cultures were performed for MTB in KwaZulu-  
119 Natal. The total number of specimens for which culture was requested, decreased annually with  
120 the average percentage decline of 14.2% (sd 11.3%) per year. Similarly, the MTB positivity  
121 rate decreased by 6.0% (from 15.6% to 9.6%) (Figure 1). After removing duplicates, there were  
122 36644, 30208, 22568, 14672 culture confirmed cases of TB in 2011, 2012, 2013 and 2014  
123 respectively. The average percentage decline in total positives TB cases was 27.1% (sd 9.5%)  
124 per year.

125 About 85% (88559) cases of culture positive TB had an LPA done to test for drug susceptibility  
126 against RIF and INH (Table 1). Of these, 19190 (21.7%) were resistant to INH and 18352  
127 (20.7%) were resistant to RIF. There were 953 RIF mono-resistant (RMR) cases in 2011, 767  
128 in 2012, 676 in 2013 and 667 in 2014. The proportion of RMR out of all RIF resistant cases  
129 increased from 15.3% in 2011 to 21.4% in 2014. Over the same four-year period, there were  
130 3396 (17.7%) INH mono-resistance (IMR) cases.

131 A steady decline of both MDR and XDR TB cases was noted, with an overall decline of 49.2%  
132 (from 6901 in 2011 to 3506 in 2014) and 44.9% (from 706 in 2011 to 389 in 2014) respectively  
133 (Table 2). The proportion of TB cases that had MDR TB ranged from 18.8% in 2011 to 23.9%  
134 in 2014, with an overall average of 21%. The overall rate of XDR TB among MDR TB cases  
135 was 11% (2336 XDR TB cases out of 21221 MDR TB).

1  
2  
3 136 The majority of the TB cases were males; however, females constituted highest prevalence of  
4  
5 137 the DR TB across all age groups (Fig 2 and 3). The number of MDR TB cases was higher  
6  
7 138 among females than males until the age of 34, thereafter males had a higher number than  
8  
9 139 females. Similarly, for XDR TB, females constituted the most number of XDR TB. More than  
10  
11 140 60% of both MDR and XDR TB cases were patients between the ages of 25 and 44 years. It  
12  
13 141 was observed that children less than 5 years of age showed the lowest rates of MDR TB whilst  
14  
15 142 that of XDR TB was lowest between the ages of 6-14 years.

16  
17  
18  
19  
20 143 Over the 4-year period, eThekweni district had the highest number of TB cases with 47.5% of  
21  
22 144 all cases in KZN coming from this district (Table 2). However, the districts with the highest  
23  
24 145 yearly proportion of MDR TB cases each year were Umkhanyakude (mean 33.2%, sd 2.3%),  
25  
26 146 followed by Zululand (mean 28.1%, sd 2.3) and Harry Gwala (mean 26.2%, sd 9.4). The yearly  
27  
28 147 proportion of MDR TB cases that had XDR TB were highest at Umzinyathi (mean 36.4%, sd  
29  
30 148 5.8%) followed by eThekweni (mean 13.7%, sd 1.1%) and Uthukela (mean 13.2%, sd 5.7%)  
31  
32 149 districts. Umkhanyakude district had the lowest proportion of XDR with a yearly mean of  
33  
34 150 3.4% (sd 2.4%) over the study period (Figure 4).

35  
36  
37  
38  
39 151

## 152 Discussion

153 In this study we observe a decline in the number of samples processed for MTB culture and  
154 culture positivity rate which coincided, with the roll out of the Xpert. This is in keeping with  
155 the Xpert roll out which started in March 2011 and was completed in September 2013 when  
156 all health facilities in the provinces were using the Xpert for TB diagnosis. According to the  
157 South African guidelines, MTB culture is not recommended for Xpert rifampicin susceptible  
158 patients, which constitutes the majority of patients infected with TB, hence the decline in the  
159 number of MTB cultures from 277 963 in 2011 to 172 671 in 2014. Nevertheless, the sheer

1  
2  
3 160 volumes of MTB cultures are still enormous which reflects the overwhelming burden of DR  
4  
5 161 TB in this region. Prior to Xpert introduction, drug susceptibility testing for MTB was only  
6  
7 162 performed on patients that were considered to be at risk of DR TB, but the use of Xpert for  
8  
9 163 initial diagnosis of TB enables screening for rifampicin resistance in all patients. The revised  
10  
11 164 indications for culture selects for cases that are more likely to have drug resistant (Xpert  
12  
13 165 rifampicin resistant TB) and paucibacillary TB (extra-pulmonary TB and HIV positive Xpert  
14  
15 166 negative), which explains the high rates of DR TB and declining culture positivity rate observed  
16  
17 167 in this study.  
18  
19  
20  
21  
22

23  
24 169 Rifampicin is always used in combination with other drugs in the treatment of TB in SA. In  
25  
26 170 addition, spontaneously occurring mutations are rare compared to other TB drugs [8].  
27  
28 171 Consequently, the development of RMR is expected to be uncommon. The finding of  
29  
30 172 increasing mono-resistance in this context is therefore concerning. In a previous study done by  
31  
32 173 Coovadia et al, at the same laboratory, RMR was 8.8% during the years 2007-2009 [9].  
33  
34 174 Similarly, Mukinda et al reported increasing RMR in the Western Cape province of SA [10].  
35  
36 175 These findings highlight the importance of testing for INH resistance in all patients with Xpert  
37  
38 176 rifampicin resistance. This positively impacts patient management further as patients with  
39  
40 177 confirmed rifampicin mono-resistance could benefit by using isoniazid in their treatment  
41  
42 178 regimen.  
43  
44  
45  
46  
47  
48

49 180 The development of rifampicin resistance has serious effects on the treatment of TB. Patients  
50  
51 181 have to be treated with more expensive and more toxic drugs for a longer duration. Studies  
52  
53 182 have been conducted in order to elucidate the causes of RMR with the majority reporting an  
54  
55 183 association between HIV and RMR [11-12]. Factors contributing to this association include  
56  
57 184 decreased drug bioavailability, and drug- drug interactions which lead to decreased rifampicin  
58  
59  
60

1  
2  
3 185 serum levels [13]. Furthermore, advanced immunosuppression increases susceptibility to  
4  
5 186 infection and permits proliferation of TB which favours transmission [14]. Given the high rate  
6  
7  
8 187 of TB/HIV co-infection in our setting, it is possible that HIV may be contributing to the  
9  
10 188 increasing rate of RMR. Whether using a higher dose of rifampicin proves to be beneficial in  
11  
12 189 co-infected patients remains under investigation.

13  
14  
15 190

16  
17 191 Rifampicin and INH are core drugs that form the backbone for first line short course therapy  
18  
19 192 for the treatment of drug susceptible TB. Given the high burden of disease in this region  
20  
21 193 coupled with the use of Xpert as a screening tool for DR TB, mono-resistance to INH may  
22  
23 194 inevitably be overlooked. According to the national TB algorithm, a diagnosis of IMR TB is  
24  
25 195 only made using TB culture and DST following a negative Xpert result or treatment failure.  
26  
27 196 The use of standard first line TB therapy in patients with undetected INH resistance equates to  
28  
29 197 using rifampicin monotherapy during the continuation phase. This may subsequently lead to  
30  
31 198 the development of MDR TB. This was described in a study done by Jacobson et al where  
32  
33 199 treatment of patients with IMR using standard first line therapy was associated with poor  
34  
35 200 outcomes and progression to MDR TB [15]. Several studies have reported previous TB therapy  
36  
37 201 as a risk factor for IMR [16-17]. Identifying risk factors for IMR could help to select patients  
38  
39 202 who may require TB culture and DST in order to exclude INH resistance.  
40  
41  
42  
43  
44  
45 203

46  
47 204 There was an overall decline in the numbers of MDR (from 6901 in 2011 to 3506 in 2014) and  
48  
49 205 XDR TB (from 706 in 2011 to 389 in 2014) cases identified using culture. This was in contrast  
50  
51 206 to the increasing number of MDR/RR-TB cases following the introduction of the Xpert in  
52  
53 207 South Africa during this time [18-20]. Perhaps a plausible explanation is that, contrary to the  
54  
55 208 national guidelines, a significant number of patients where Xpert detected rifampicin resistance  
56  
57 209 did not get a subsequent MTB culture for confirmation. This was supported by the 2016 WHO  
58  
59  
60

1  
2  
3 210 TB report, that reported the percentage of MDR TB among MDR/RR-TB as 62% in South  
4  
5 211 Africa, which suggests that a substantial number of Xpert RR cases are not confirmed by  
6  
7 212 culture as this discrepancy cannot be explained by RMR cases [1]. Hence this indicates a  
8  
9 213 change in the testing method used to diagnose tuberculosis rather than a successful TB control  
10  
11 214 program, which led to underestimation of MDR and XDR TB cases in this study. Other possible  
12  
13 215 reasons may include patient loss to follow up and loss of MTB viability (no growth on culture)  
14  
15 216 which could be caused by long transport duration in specimens from remote areas. According  
16  
17 217 to the WHO, only 41% of notified MDR/RR-TB cases from South Africa were enrolled for  
18  
19 218 MDR TB treatment in 2013[18]. Although this figure improved to 62% in 2014 [20], the gap  
20  
21 219 remains substantial especially given the considerable improvement in rapidity of diagnosing  
22  
23 220 DR TB with Xpert. The proportion of MDR TB cases that have XDR TB also remained  
24  
25 221 constant at about 11% which is comparable to the global trends at that time [18-20].  
26  
27  
28  
29  
30  
31  
32

33 223 Our study found higher rates of DR TB in women compared to men which supports findings  
34  
35 224 from other studies showing higher proportions of DR TB in women [21-22]. Even though  
36  
37 225 reasons behind the higher DR TB predisposition among women are unknown, HIV could be a  
38  
39 226 contributing factor. The majority of DR TB cases were found between the ages of 15 and 44  
40  
41 227 years, which is the same age group that is known to have the highest HIV prevalence [2]. It is  
42  
43 228 well recognised that HIV is a major risk factor for development of TB and HAART reduces its  
44  
45 229 incidence [23-25]. Indeed, Nanoo et al showed an inverse relationship between antiretroviral  
46  
47 230 therapy coverage and the incidence of microbiologically confirmed TB in South Africa, with  
48  
49 231 the greatest decline demonstrated in the 25-44 year age group [26].  
50  
51  
52  
53  
54  
55

56 233 The diagnosis of DR TB in children is generally difficult due to their inability to expectorate  
57  
58 234 and the paucibacillary nature of childhood TB. Consequently, DR data is limited, but since TB  
59  
60

1  
2  
3 235 in children is largely as a result of primary transmission from adults, the proportion of DR TB  
4  
5 236 is reported to be similar to that of adults [27-28]. Herein, we observed lower rates of DR TB  
6  
7 237 (Figure 2) particularly MDR TB in children less than five years compared to adults which could  
8  
9 238 be a reflection of the under diagnosis of DR TB in this age group. Although these rates are  
10  
11 239 lower in children, they are still unacceptable as they reflect transmission of untreated adult TB.  
12  
13  
14  
15 240

16  
17 241 Similar to the overall burden of TB in South Africa, DR TB is also concentrated in urban areas  
18  
19 242 of KZN with eThekweni district harbouring most of the cases due to high population density.  
20  
21 243 However, the rate of MDR TB cases was highest among the northern districts of the province  
22  
23 244 of Umkhanyakude and Zululand. These are rural districts which share borders with  
24  
25 245 Mpumalanga province, Swaziland and Mozambique, thus migration may influence resistance  
26  
27 246 patterns. Mpumalanga province is known to have the highest DR TB rate in the country while  
28  
29 247 Swaziland has the highest MDR TB prevalence in Africa [29-30]. In 2007, Wallengren et al  
30  
31 248 reported Umzinyathi and Umkhanyakude as the districts with the highest MDR TB rates [31].  
32  
33 249 The intervention given to the Umzinyathi district following the outbreak of XDR TB in 2005  
34  
35 250 (Intensive case finding, early diagnosis and initiation treatment for TB, early diagnosis and  
36  
37 251 treatment of HIV, TB infection control and intergration of TB and HIV care) may be  
38  
39 252 responsible for these decreasing rates [32]. Despite declining XDR TB rates at the Umzinyathi  
40  
41 253 district (where the XDR TB outbreak was identified in 2005), it still remains the district with  
42  
43 254 the highest XDR TB rates at about three times higher than the rest of KZN [33].  
44  
45  
46  
47  
48  
49 255

### 256 **Limitations**

257 Our study is limited by the retrospective design; the accuracy of the data is dependent on  
258 available information on the LIS. The absence of unique patient identifiers also affects the  
259 accuracy of the data as the removal of duplicates is imperfect. Although duplicates were  
60

1  
2  
3 260 removed, we could not differentiate between new and known MDR TB patients. The patient  
4  
5 261 level Xpert data was not available in order to match with the TB culture results. Nevertheless,  
6  
7  
8 262 the high burden of DR TB and the fact that all cultures are performed in one laboratory for the  
9  
10 263 whole province provide an important insight to the distribution of TB in this region and may  
11  
12 264 inform targeted intervention.  
13  
14  
15 265

### 17 266 **Conclusions**

19 267 Our findings highlight the importance of DR TB diagnostic algorithms that include both  
20  
21 268 rifampicin and isoniazid DST in the initial testing. Early detection of RMR will allow addition  
22  
23  
24 269 of isoniazid in the treatment regimen, while detection of IMR will prevent rifampicin  
25  
26 270 monotherapy later on during the continuation phase of treatment which has been associated  
27  
28 271 with development of rifampicin resistance. This will also allow us to have a clearer estimate of  
29  
30 272 MDR TB cases. HIV and migration play a significant role in the distribution of DR TB in this  
31  
32  
33 273 region, therefore TB control measures that address these factors may have impact on DR TB  
34  
35 274 level.  
36  
37  
38  
39 275

### 41 276 **Acknowledgments**

43  
44  
45 277 We thank the staff at the Inkosi Albert Luthuli Central Hospital TB laboratory for their  
46  
47 278 dedication and hard work. We also thank Thandi Kapwata from the Environment and Health  
48  
49 279 Research Unit within the South African Medical Research Council, for designing the provincial  
50  
51 280 maps.  
52  
53  
54  
55 281

### 58 282 **Author contributions**

1  
2  
3 283 NRM contributed in the development of the concept, study design, data analysis and writing  
4  
5 284 of the manuscript. YB performed data analysis and assisted with the writing of the manuscript.  
6  
7  
8 285 KL contributed in the interpretation of data and writing of the manuscript. KPM supervised the  
9  
10 286 development of the study concept, study design, data analysis and manuscript writing.  
11  
12

13 287

16 288 **Data sharing statement:** No additional data available

19 289 **Competing interests:** None

22 290 **Funding:** None

26 291

29 292

## References

31 293

33 294 1. World Health Organization. Global Tuberculosis Report 2017.

36 295 [http://www.who.int/tb/publications/global\\_report/gtbr2017\\_main\\_text.pdf](http://www.who.int/tb/publications/global_report/gtbr2017_main_text.pdf)

38 296

40 297 2. Gandhi NR, et al. Extensively drug-resistant tuberculosis as a cause of death in patients  
42 298 co-infected with tuberculosis and HIV in a rural area of South Africa. *The Lancet* 2006;  
44 299 368: 1575-1580.

47 300

49 301 3. Ndjeka N. National Department of Health. Multi-drug resistant tuberculosis: strategic  
51 302 overview on MDR-TB care in South Africa. 2014. [https://www.health-e.org.za/wp-](https://www.health-e.org.za/wp-content/uploads/2014/03/Strategic_overview_of_MDR_TB_RSA.pdf)  
53 303 [content/uploads/2014/03/Strategic\\_overview\\_of\\_MDR\\_TB\\_RSA.pdf](https://www.health-e.org.za/wp-content/uploads/2014/03/Strategic_overview_of_MDR_TB_RSA.pdf).

56 304

59 305



- 1  
2  
3 306 4. Hassim S, et al. Detection of a substantial rate of multidrug-resistant tuberculosis in an  
4  
5 307 HIV-infected population in South Africa by active monitoring of sputum samples.  
6  
7 308 *Clinical Infectious Disease* 2010; 50: 1053-1059.  
8  
9  
10 309  
11  
12 310 5. Helb D, et al. Rapid detection of *Mycobacterium tuberculosis* and rifampin resistance  
13  
14 311 by use of on-demand, near-patient technology. *Journal of Clinical Microbiology* 2010;  
15  
16 312 48: 229-237.  
17  
18  
19 313  
20  
21 314 6. Boehme CC, et al. Rapid molecular detection of tuberculosis and rifampin resistance.  
22  
23 315 *New England Journal of Medicine* 2010; 363: 1005-1015.  
24  
25  
26 316  
27  
28 317 7. National Department of Health, South Africa. National tuberculosis management  
29  
30 318 guidelines. 2014.  
31  
32  
33 319 [https://www.health-e.org.za/wp-content/uploads/2014/06/NTCP\\_Adult\\_TB-](https://www.health-e.org.za/wp-content/uploads/2014/06/NTCP_Adult_TB-Guidelines-27.5.2014.pdf)  
34  
35 320 [Guidelines-27.5.2014.pdf](https://www.health-e.org.za/wp-content/uploads/2014/06/NTCP_Adult_TB-Guidelines-27.5.2014.pdf)  
36  
37  
38  
39 321  
40  
41  
42 322 8. David HL. Probability distribution of drug-resistant mutants in unselected populations  
43  
44 323 of *Mycobacterium tuberculosis*. *Journal of Applied Microbiology* 1970; 20: 810–814.  
45  
46  
47 324  
48  
49 325 9. Coovadia YM, et al. Rifampicin mono-resistance in *Mycobacterium tuberculosis* in  
50  
51 326 KwaZulu-Natal, South Africa: a significant phenomenon in a high prevalence TB-HIV  
52  
53 327 region. *PLOS ONE*. 2013, 8: e77712.  
54  
55  
56  
57 328  
58  
59  
60

- 1  
2  
3 329 10. Mukinda FK, et al. Rise in rifampicin-mono-resistant tuberculosis in Western Cape,  
4  
5 330 South Africa. *International Journal of Tuberculosis and Lung Disease* 2012; 16: 196–  
6  
7 331 202.  
8  
9  
10 332  
11  
12 333 11. Sandman L, et al. Risk factors for rifampin-mono-resistant tuberculosis: a case-control  
13  
14 334 study. *American Journal of Respiratory and Critical Care Medicine* 1999; 159:468–  
15  
16 335 472.  
17  
18  
19  
20 336  
21  
22  
23 337 12. Villegas L, et al. Prevalence, risk factors, and treatment outcomes of isoniazid and  
24  
25 338 rifampicin mono-resistant pulmonary tuberculosis in Lima, Peru. *PLOS ONE* 2016; 11:  
26  
27 339 e0152933.  
28  
29  
30 340  
31  
32 341 13. Gurumurthy P, et al. Malabsorption of rifampicin and isoniazid in HIV infected patients  
33  
34 342 with and without tuberculosis. *Clinical Infectious Disease* 2004; 38: 280–283.  
35  
36  
37 343  
38  
39  
40  
41 344 14. Bifani P, et al. The evolution of drug resistance in *Mycobacterium tuberculosis*: from a  
42  
43 345 mono-rifampin-resistant cluster into increasingly multidrug-resistant variants in an  
44  
45 346 HIV-seropositive population. *Journal of Infectious Disease* 2008; 198: 90–94.  
46  
47  
48 347  
49  
50 348 15. Jacobson KR, et al. Treatment outcomes of isoniazid-resistant tuberculosis patients,  
51  
52 349 Western Cape province, South Africa. *Clinical Infectious Disease* 2011; 53: 369–372.  
53  
54  
55  
56 350  
57  
58  
59  
60

- 1  
2  
3 351 16. Cattamanchi A, et al. Clinical characteristics and treatment outcomes of isoniazid  
4  
5 352 mono-resistant tuberculosis. *Clinical Infectious Disease* 2009; 48: 179–185.  
6  
7  
8 353  
9  
10 354 17. Fox L, et al. Comparison of isoniazid monoresistant tuberculosis with drug-susceptible  
11  
12 355 tuberculosis and multidrug-resistant tuberculosis. *European Journal of Clinical*  
13  
14 356 *Microbiology & Infectious Diseases* 2011; 30: 863-867.  
15  
16  
17 357  
18  
19 358 18. World Health Organization. Global Tuberculosis Report. 2013  
20  
21  
22 359 [http://apps.who.int/iris/bitstream/10665/91355/1/9789241564656\\_eng.pdf](http://apps.who.int/iris/bitstream/10665/91355/1/9789241564656_eng.pdf)  
23  
24 360  
25  
26  
27 361 19. World Health Organization. Global Tuberculosis Report 2014.  
28  
29  
30 362 [http://apps.who.int/iris/bitstream/10665/137094/1/9789241564809\\_eng.pdf](http://apps.who.int/iris/bitstream/10665/137094/1/9789241564809_eng.pdf)  
31  
32  
33 363  
34  
35  
36 364 20. World Health Organization. Global Tuberculosis Report. 2015  
37  
38  
39 365 [http://apps.who.int/iris/bitstream/10665/191102/1/9789241565059\\_eng.pdf](http://apps.who.int/iris/bitstream/10665/191102/1/9789241565059_eng.pdf)  
40  
41  
42 366  
43  
44  
45 367 21. O'Donnell MR, et al. Extensively drug-resistant tuberculosis in women, KwaZulu-  
46  
47 368 Natal, South Africa. *Emerging Infectious Disease* 2011; 17: 1942–1945.  
48  
49  
50 369  
51  
52  
53 370 22. Cox HS, et al. Multidrug-resistant tuberculosis in Central Asia. *Emerging Infectious*  
54  
55 371 *Disease* 2004; 10: 865–872.  
56  
57  
58 372  
59  
60

- 1  
2  
3 373 23. Sonnenberg P, et al. How soon after infection with HIV does the risk of tuberculosis  
4  
5 374 start to increase? A retrospective cohort study in South African gold miners. *Journal of*  
6  
7  
8 375 *Infectious Disease* 2005 15; 191: 150-158.  
9  
10  
11 376  
12  
13  
14 377 24. Badri M, et al. Association between tuberculosis and HIV disease progression in a high  
15  
16 378 tuberculosis prevalence area. *International Journal of Tuberculosis and Lung Disease*  
17  
18 379 2001; 5: 225–232.  
19  
20  
21 380  
22  
23  
24  
25 381 25. Badri M, et al. Effect of highly active antiretroviral therapy on incidence of tuberculosis  
26  
27 382 in South Africa: a cohort study. *Lancet* 2002; 359: 2059–2064.  
28  
29  
30 383  
31  
32  
33 384 26. Nanoo A, et al. Nationwide and regional incidence of microbiologically confirmed  
34  
35 385 pulmonary tuberculosis in South Africa, 2004–12: a time series analysis. *Lancet*  
36  
37 386 *Infectious Disease* 2015; 15: 1066–1076.  
38  
39  
40 387  
41  
42  
43 388 27. Schaaf HS, et al. Surveillance of anti-tuberculosis drug resistance among children from  
44  
45 389 the Western Cape Province of South Africa—an upward trend. *American Journal of*  
46  
47 390 *Public Health* 2009; 99: 1486-1490.  
48  
49  
50 391  
51  
52  
53 392 28. Zignol M, et al. Multidrug-resistant tuberculosis in children: evidence from global  
54  
55 393 surveillance. *European Respiratory Journal* 2013; 42: 701–707.  
56  
57  
58 394  
59  
60

- 1  
2  
3 395 29. Andrews JR, et al. Multidrug-resistant and extensively drug-resistant tuberculosis:  
4  
5 396 implications for the HIV epidemic and antiretroviral therapy rollout in South Africa.  
6  
7 397 *Journal of Infectious Disease* 2007; 196: S482-S490.  
8  
9  
10  
11 398  
12  
13  
14 399 30. Sanchez-Padilla E, et al. High prevalence of multidrug-resistant tuberculosis,  
15  
16 400 Swaziland, 2009–2010. *Emerging Infectious Diseases* 2012; 18: 29–37.  
17  
18  
19 401  
20  
21  
22  
23 402 31. Wallengren K, et al. Drug-resistant tuberculosis, KwaZulu-Natal, South Africa, 2001–  
24  
25 403 2007. *Emerging Infectious Diseases* 2011; 17: 1913-1916.  
26  
27 404  
28  
29 405 32. Bateman C. Tugela Ferry’s extensively drug-resistant tuberculosis – 10 years on.  
30  
31 406 *South African Medical Journal* 2015;105: 517-520.  
32  
33  
34 407  
35  
36  
37  
38 408 33. Lim JR, et al. Incidence and geographic distribution of extensively drug resistant  
39  
40 409 tuberculosis in KwaZulu-Natal province, South Africa. *PLOS ONE* 2015; 10:  
41  
42 410 e0132076.  
43  
44  
45 411  
46  
47 412  
48  
49 413  
50  
51 414  
52  
53 415  
54  
55  
56  
57 416  
58  
59  
60

417

| Table 1. LPA results between 2011 and 2014: RIF and INH mono-resistance* |       |       |       |       |
|--------------------------------------------------------------------------|-------|-------|-------|-------|
|                                                                          | 2011  | 2012  | 2013  | 2014  |
| <b>Total culture positives</b>                                           | 36644 | 30208 | 22568 | 14672 |
| <b>Total cases LPA</b>                                                   | 31368 | 26513 | 18399 | 12279 |
| <b>% of LPA done</b>                                                     | 85.6  | 87.8  | 81.5  | 83.7  |
| <b>LPA Any INH Resistance</b>                                            | 6430  | 5548  | 4167  | 3045  |
| <b>LPA Any INH Resistance (%)</b>                                        | 20.5  | 20.9  | 22.7  | 24.8  |
| <b>LPA INH MR</b>                                                        | 845   | 1167  | 879   | 505   |
| <b>LPA INH MR (% of All INH Resistant)</b>                               | 13.8  | 21.0  | 21.1  | 17.1  |
| <b>LPA Any RIF Resistance</b>                                            | 6293  | 5013  | 3912  | 3134  |
| <b>LPA Any RIF Resistance (%)</b>                                        | 20.1  | 18.9  | 21.3  | 25.5  |
| <b>LPA RIF MR</b>                                                        | 953   | 767   | 676   | 667   |
| <b>LPA RIF MR (% of All RIF Resistant)</b>                               | 15.1  | 15.3  | 17.3  | 21.3  |

418 \*RIF, Rifampicin; INH, isoniazid; LPA, line probe assay; MR, mono-resistance

419

Table 2. Total TB positive, MDR and XDR cases per district for each year.

| District      | 2011            |      |      |     |      | 2012            |      |      |     |      | 2013            |      |      |     |      | 2014            |      |      |     |      |
|---------------|-----------------|------|------|-----|------|-----------------|------|------|-----|------|-----------------|------|------|-----|------|-----------------|------|------|-----|------|
|               | Total positives | MDR  | %    | XDR | %    | Total positives | MDR  | %    | XDR | %    | Total positives | MDR  | %    | XDR | %    | Total positives | MDR  | %    | XDR | %    |
| Amajuba       | 597             | 96   | 16.1 | 8   | 8.3  | 523             | 86   | 16.4 | 4   | 4.7  | 353             | 40   | 11.3 | 4   | 10.0 | 272             | 35   | 12.9 | 0   | 0.0  |
| Ethekwini     | 17519           | 2837 | 16.2 | 353 | 12.4 | 13453           | 2306 | 17.1 | 338 | 14.7 | 11118           | 2212 | 19.9 | 321 | 14.5 | 7404            | 1516 | 20.5 | 203 | 13.4 |
| Harry Gwala   | 776             | 124  | 16.0 | 5   | 4.0  | 752             | 191  | 25.4 | 13  | 6.8  | 526             | 186  | 35.4 | 4   | 2.2  | 396             | 142  | 35.9 | 12  | 8.5  |
| Ilembe        | 1704            | 269  | 15.8 | 9   | 3.3  | 1219            | 206  | 16.9 | 16  | 7.8  | 978             | 180  | 18.4 | 7   | 3.9  | 405             | 76   | 18.8 | 6   | 7.9  |
| Ugu           | 2172            | 542  | 25.0 | 37  | 6.8  | 2443            | 465  | 19.0 | 47  | 10.1 | 1655            | 388  | 23.4 | 34  | 8.8  | 1123            | 268  | 23.9 | 12  | 4.5  |
| Umgungundlovu | 3514            | 520  | 14.8 | 55  | 10.6 | 2858            | 532  | 18.6 | 57  | 10.7 | 1486            | 305  | 20.5 | 27  | 8.9  | 703             | 159  | 22.6 | 22  | 13.8 |
| Umkhanyakude  | 2230            | 732  | 32.8 | 5   | 0.7  | 1619            | 501  | 30.9 | 29  | 5.8  | 1214            | 422  | 34.8 | 15  | 3.6  | 945             | 341  | 36.1 | 19  | 5.6  |
| Umzinyathi    | 1478            | 334  | 22.6 | 134 | 40.1 | 1295            | 257  | 19.8 | 102 | 39.7 | 894             | 192  | 21.5 | 66  | 34.4 | 674             | 196  | 29.1 | 54  | 27.6 |
| Uthukela      | 1100            | 120  | 10.9 | 16  | 13.3 | 1023            | 111  | 10.9 | 13  | 11.7 | 545             | 71   | 13.0 | 6   | 8.5  | 261             | 55   | 21.1 | 12  | 21.8 |
| Uthungulu     | 2640            | 589  | 22.3 | 30  | 5.1  | 2737            | 590  | 21.6 | 41  | 6.9  | 2315            | 477  | 20.6 | 26  | 5.5  | 1178            | 294  | 25.0 | 12  | 4.1  |
| Zululand      | 2888            | 735  | 25.5 | 54  | 7.3  | 2259            | 662  | 29.3 | 37  | 5.6  | 1468            | 428  | 29.2 | 34  | 7.9  | 1168            | 362  | 31.0 | 28  | 7.7  |

|         |       |      |      |     |      |       |      |      |     |      |       |      |      |     |      |       |      |      |     |      |
|---------|-------|------|------|-----|------|-------|------|------|-----|------|-------|------|------|-----|------|-------|------|------|-----|------|
| Unknown | 26    | 3    | 11.5 | 0   | 0.0  | 27    | 5    | 18.5 | 0   | 0.0  | 16    | 1    | 6.3  | 0   | 0.0  | 143   | 62   | 43.4 | 9   | 14.5 |
| Total   | 36644 | 6901 | 18.8 | 706 | 10.2 | 30208 | 5912 | 19.6 | 697 | 11.8 | 22568 | 4902 | 21.7 | 544 | 11.1 | 14672 | 3506 | 23.9 | 389 | 11.1 |

420

421

\* MDR, multidrug-resistant; XDR, extensively drug-resistant; TB, tuberculosis

For peer review only

1  
2  
3  
4  
5  
6  
7  
8  
9  
10  
11  
12  
13  
14  
15  
16  
17  
18  
19  
20  
21  
22  
23  
24  
25  
26  
27  
28  
29  
30  
31  
32  
33  
34  
35  
36  
37  
38  
39  
40  
41  
42  
43  
44  
45  
46



1  
2  
3  
4  
5  
6  
7  
8  
9  
10  
11  
12  
13  
14  
15  
16  
17  
18  
19  
20  
21  
22  
23  
24  
25  
26  
27  
28  
29  
30  
31  
32  
33  
34  
35  
36  
37  
38  
39  
40  
41  
42  
43  
44  
45  
46  
47  
48  
49  
50  
51  
52  
53  
54  
55  
56  
57  
58  
59  
60

422

For peer review only

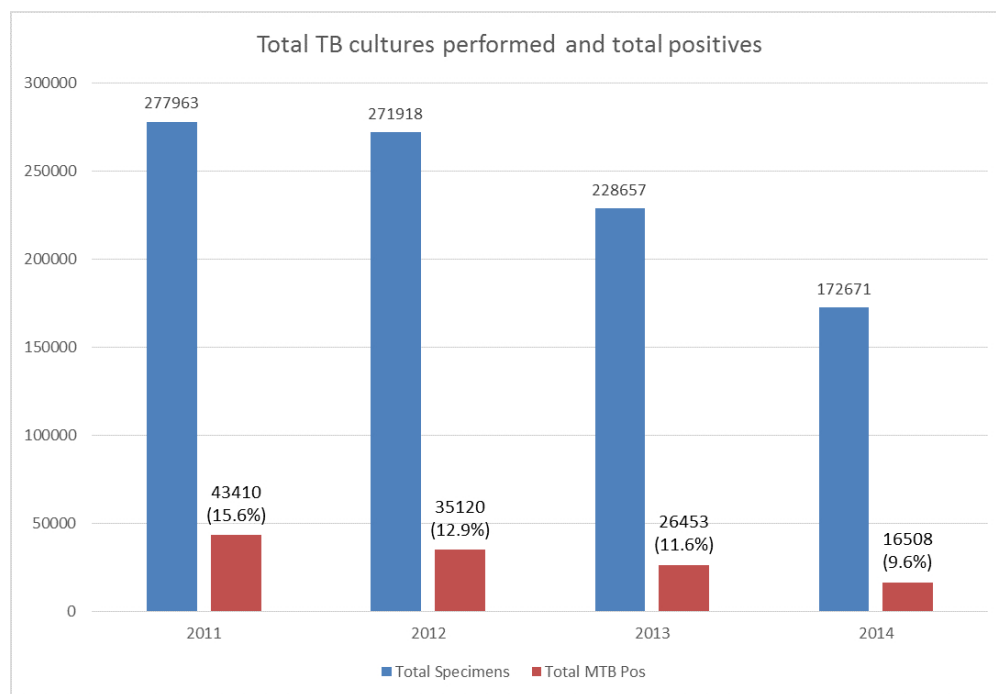

Figure 1: TB culture specimens processed between 2011 and 2014. The figure shows the total number of specimens received and the total number (and percentage) thereof that were positive.

184x127mm (150 x 150 DPI)

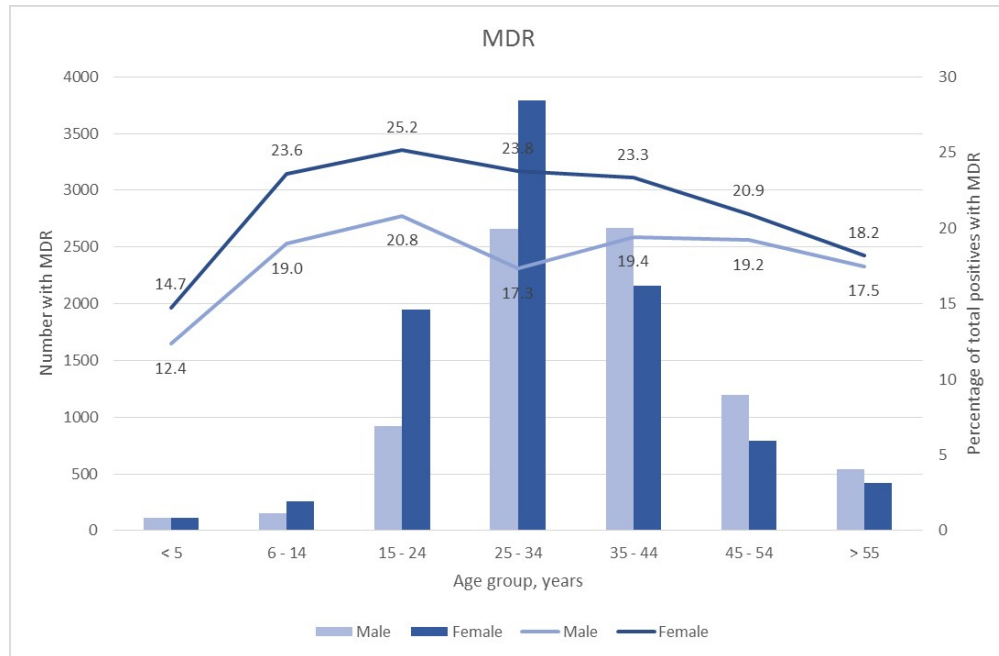

Figure 2: Distribution of MDR TB cases and proportions by gender. The number of MDR TB cases (represented by bars) by gender and the percentage (represented by lines) that is MDR TB of total positive cases by gender

184x120mm (150 x 150 DPI)

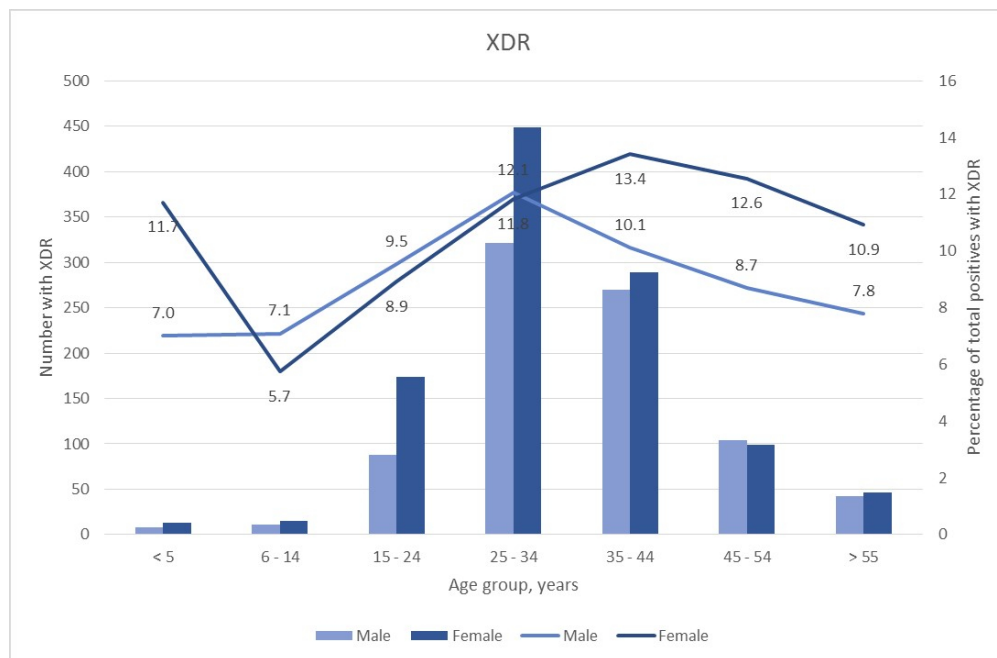

Figure 3: Distribution of XDR TB cases and proportions by gender. The number of XDR TB cases (represented by bars) by gender and the percentage (represented by lines) that is XDR of total positive cases by gender

184x120mm (150 x 150 DPI)

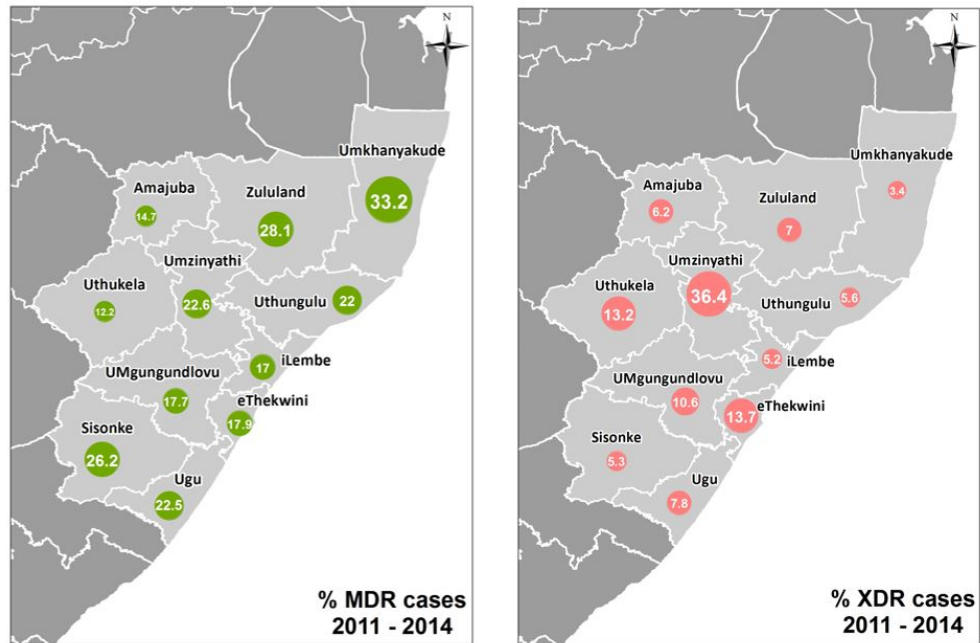

Figure 4: The first panel depicts the percentage of MDR TB cases per district for the period 2011 – 2014. The percentage of MDR TB cases among TB cases diagnosed by culture between 2011 and 2014. The size of the circle represents the percentage

252x168mm (96 x 96 DPI)

# BMJ Open

## Evolving rifampicin and isoniazid mono-resistance in a high MDR and XDR TB region: a retrospective data analysis

|                                 |                                                                                                                                                                                                                                                                                                                                                                                                                                         |
|---------------------------------|-----------------------------------------------------------------------------------------------------------------------------------------------------------------------------------------------------------------------------------------------------------------------------------------------------------------------------------------------------------------------------------------------------------------------------------------|
| Journal:                        | <i>BMJ Open</i>                                                                                                                                                                                                                                                                                                                                                                                                                         |
| Manuscript ID                   | bmjopen-2019-031663.R1                                                                                                                                                                                                                                                                                                                                                                                                                  |
| Article Type:                   | Original research                                                                                                                                                                                                                                                                                                                                                                                                                       |
| Date Submitted by the Author:   | 10-Sep-2019                                                                                                                                                                                                                                                                                                                                                                                                                             |
| Complete List of Authors:       | Mvelase, Nomonde; National Health Laboratory Service, Medical Microbiology<br>Balakrishna, Yusenitha; South African Medical Research Council, Biostatistics Unit<br>Lutchminarain, Keeren; National Health Laboratory Service, Medical Microbiology ; University of KwaZulu-Natal, Medical Microbiology<br>Mlisana, Koleka; National Health Laboratory Service, Medical Microbiology; University of KwaZulu-Natal, Medical Microbiology |
| <b>Primary Subject Heading</b>: | Infectious diseases                                                                                                                                                                                                                                                                                                                                                                                                                     |
| Secondary Subject Heading:      | Diagnostics, Epidemiology, Public health, Infectious diseases, Health policy                                                                                                                                                                                                                                                                                                                                                            |
| Keywords:                       | Tuberculosis < INFECTIOUS DISEASES, Public health < INFECTIOUS DISEASES, Health policy < HEALTH SERVICES ADMINISTRATION & MANAGEMENT, Diagnostic microbiology < INFECTIOUS DISEASES, Epidemiology < INFECTIOUS DISEASES                                                                                                                                                                                                                 |
|                                 |                                                                                                                                                                                                                                                                                                                                                                                                                                         |

SCHOLARONE™  
Manuscripts

1  
2  
3 **Evolving rifampicin and isoniazid mono-resistance in a high MDR and XDR-TB region:**  
4  
5 **a retrospective data analysis**  
6  
7

8 N. R. Mvelase <sup>1,2</sup>, Y. Balakrishna <sup>3</sup>, K. Lutchminarain <sup>1,2</sup>, K. Mlisana <sup>1,2,4</sup>  
9

10  
11 <sup>1</sup>Department of Medical Microbiology, KwaZulu-Natal Academic Complex, National Health  
12 Laboratory Service, Durban, South Africa  
13  
14

15  
16  
17 <sup>2</sup>Department of Medical Microbiology, School of Laboratory Medicine & Medical Sciences,  
18 University of KwaZulu-Natal, Durban, South Africa  
19  
20

21  
22 <sup>3</sup>Biostatistics Unit, South African Medical Research Council, Durban, South Africa  
23  
24

25  
26 <sup>4</sup>Centre for the AIDS Programme of Research in South Africa (CAPRISA), University of  
27 KwaZulu-Natal, Durban, South Africa  
28  
29

30  
31  
32  
33  
34 Corresponding author: Nomonde R. Mvelase  
35

36  
37 Address: KwaZulu-Natal National Health Laboratory Service, Department of Medical  
38 Microbiology, Level 4, Laboratory Building, IALCH, Durban, South Africa  
39  
40

41  
42 Email: dlamini15@ukzn.ac.za  
43  
44

45  
46 Running Title: Drug resistant TB in KwaZulu-Natal  
47  
48  
49  
50  
51  
52  
53  
54  
55  
56  
57  
58  
59  
60

## Abstract

**Objectives:** South Africa ranks among the highest drug resistant tuberculosis burdened countries in the world. This study assessed the changes in resistance levels in culture confirmed *Mycobacterium tuberculosis* (MTB) in the highest burdened province of South Africa during a period where major changes in diagnostic algorithm were implemented.

**Setting:** This retrospective observational study was conducted at the central academic laboratory of the KwaZulu-Natal province of South Africa.

**Participants:** We analysed data for all MTB cultures performed in the KwaZulu-Natal province between 2011 and 2014. The data were collected from the laboratory information system.

**Results:** Out of 88 559 drug susceptibility results analysed, 18352 (20.7%) were resistant to rifampicin and 19190 (21.7%) showed resistance to isoniazid. The proportion of rifampicin resistant cases that were mono-resistant increased from 15.3% in 2011 to 21.4% in 2014 while INH mono-resistance showed a range between 13.8% and 21.1%. The MDR-TB rates increased from 18.8% to 23.9% and the proportion of MDR-TB cases that had XDR-TB remained between 10.2% and 11.1%. Most drug resistance was found in females between the ages of 15 to 44 years and the northern districts bordering high MDR-TB regions had the highest MDR-TB rates.

**Conclusion:** Our findings show increasing rifampicin mono-resistance and a substantial amount of INH mono-resistance. This highlights a need for an initial test that detects resistance to both these drugs so as to avoid using rifampicin monotherapy during continuous phase of treatment in patients with INH mono-resistance. Furthermore, addition of isoniazid will benefit patients with rifampicin mono-resistance. Although DR-TB is widespread, HIV



1  
2  
3 24 and migration influence its distribution; therefore, TB control strategies should include  
4  
5 25 interventions that target these aspects.  
6  
7  
8  
9 26

#### Strengths and limitations of this study

- The study was performed in the country with one of the highest TB incidence rate and a largest HIV epidemic in the world.
- The analysed data involves a period of major shift in TB diagnostic algorithm.
- The patient level Xpert MTB/RIF data was not available in order to compare with the TB culture results.
- The absence of unique patient identifiers also affects the accuracy of the data as the removal of duplicates was imperfect.

#### Background

27  
28  
29 The World Health Organisation (WHO) has declared multidrug resistant tuberculosis a global  
30 crisis. Multidrug-resistant tuberculosis (MDR TB) is defined as resistance to isoniazid and  
31 rifampicin. Despite the decline in the global incidence rates of tuberculosis (TB), drug resistant  
32 TB cases are on the rise with 558 000 estimated incident cases of MDR plus rifampicin resistant  
33 (RR) TB and more than 230 000 deaths in 2017 [1]. South Africa has one of the highest  
34 incidence of TB in the world which WHO estimated to be 567 per 100 000 in 2017 [1]. In 2017  
35 alone, South Africa had an estimated number of 14 000 rifampicin resistant cases, the second  
36 highest number in Africa after Nigeria which has more than three times the South African  
37 population [1]. Moreover, the first reported outbreak of extensively drug-resistant (XDR)  
38 tuberculosis (defined as MDR-TB plus resistance to any second line injectable and a  
59  
60

1  
2  
3 39 fluoroquinolone) which caused global concern in 2005 was from the province of KwaZulu-  
4  
5 40 Natal (KZN) in South Africa [2]. While the incidence of TB in KZN is proportional to other  
6  
7  
8 41 provinces in the country, it remains the highest drug resistant (DR) TB burdened province with  
9  
10 42 almost a third of the country's cases of drug resistant TB [3].  
11

12 43  
13  
14 44 Compounding the problem of TB in South Africa, is the high rate of co-infection with Human  
15  
16 45 Immunodeficiency Virus (HIV) (about 60%) [1]. While it is well known that HIV is associated  
17  
18 46 with smear negative TB, smear microscopy was traditionally used in the initial diagnosis of TB  
19  
20 47 because of its quick time to results and low cost [4]. On the other hand, conventional TB culture  
21  
22 48 is much more sensitive than smear microscopy, but its high cost, complexity and long delays  
23  
24 49 in getting the results made it impractical for routine diagnosis of TB. Therefore, when the WHO  
25  
26 50 endorsed the Xpert MTB/RIF (Cepheid GeneXpert, Sunnyvale, Ca, USA) in 2010, it was  
27  
28 51 subsequently introduced in South Africa in 2011. The Xpert MTB/RIF (Xpert) is an automated  
29  
30 52 nucleic acid amplification test that offers better detection of TB compared to smear microscopy  
31  
32 53 with an added advantage of the ability to detect rifampicin resistance in less than two hours in  
33  
34 54 clinical specimens [5-6].  
35  
36  
37  
38  
39  
40  
41

42 56 The implementation of Xpert in South Africa completely changed the testing algorithm for the  
43  
44 57 diagnosis of TB [7]. Xpert replaced smear microscopy in the initial diagnosis of TB and all  
45  
46 58 patients that do not demonstrate rifampicin resistance are assumed to have drug susceptible TB  
47  
48 59 and therefore initiated on standard first line TB therapy. Thus, Xpert rifampicin susceptible  
49  
50 60 cases do not get a culture, so isoniazid mono-resistance is not routinely investigated. TB culture  
51  
52 61 and drug susceptibility testing (DST) is only indicated for patients that demonstrate rifampicin  
53  
54 62 resistance on the Xpert, paucibacillary TB cases missed by Xpert (HIV infected, children and  
55  
56 63 extra-pulmonary TB) and patients that fail TB treatment.  
57  
58  
59  
60

1  
2  
3 64  
4  
5  
6 65 Despite the recent changes in the diagnosis and management of TB, there are no studies that  
7  
8 66 have assessed their impact on culture confirmed TB. The level of isoniazid mono-resistance  
9  
10 67 that is not routinely investigated with current diagnostic methods is unknown, but instead these  
11  
12 68 patients are getting rifampicin monotherapy during the continuous phase of their first line TB  
13  
14 69 therapy which could potentially fuel drug resistance. On the other hand, patients with  
15  
16  
17 70 rifampicin mono-resistance can benefit from the addition of isoniazid in their treatment. We  
18  
19 71 therefore undertook this study to evaluate the amount of rifampicin and isoniazid mono-  
20  
21 72 resistance, so as to ensure optimal and appropriate diagnostic algorithms. We also describe the  
22  
23 73 drug resistance patterns and distribution among different age groups, genders and districts in  
24  
25  
26 74 KZN, South Africa. Understanding the patterns and distributions of drug resistant TB will  
27  
28 75 inform targeted intervention in TB control in this high TB endemic region.  
29  
30  
31  
32 76

## 33 34 35 77 **Methods**

### 36 37 38 78 **Study design**

39  
40  
41 79 The study is a retrospective observational study using laboratory data for 2011 till 2014.  
42  
43  
44 80

### 45 46 81 **Study setting**

47  
48 82 The KZN province is one of nine provinces in South Africa and its population of just over 10  
49  
50 83 million ranks second in the country. There are 77 public health hospitals (including 8 MDR-  
51  
52 84 TB initiation sites) within 11 health districts. Provincial *Mycobacterium tuberculosis* culture  
53  
54 85 and drug susceptibility testing are performed in one central academic laboratory.  
55  
56  
57 86

### 58 59 87 **Laboratory Procedures**

60

1  
2  
3 88 MTB isolation from clinical samples was routinely done using the automated BACTEC  
4  
5 89 mycobacteria growth indication tubes (MGIT) 960 system (BACTEC MGIT Becton  
6  
7 90 Dickinson, USA). Indirect line probe assay (LPA) [GenoType MTBDRplus assay, Hain  
8  
9 91 Lifescience, Nehren, Germany] was performed on all positive MGIT cultures using standard  
10  
11 92 methods. Thereafter, additional DST for isoniazid (INH), rifampicin (RIF), ofloxacin,  
12  
13 93 streptomycin, kanamycin was performed for all TB culture positive cases using 1% agar  
14  
15 94 proportion method (APM) on Middlebrook 7H10.  
16  
17  
18  
19  
20  
21  
22

### 23 96 **Patient and public involvement**

24 97 The data used for this study was the routine TB diagnostic data, therefore there was no direct  
25  
26 98 patient and public involvement.  
27  
28  
29  
30

### 31 100 **Data collection and analysis**

32  
33 101 The TB culture and DST data was collected from the National Health Laboratory Service  
34  
35 102 laboratory information system (LIS) which contains all electronic laboratory results. In the  
36  
37 103 absence of a unique identifier, duplicates were removed using MRN number (number given by  
38  
39 104 the laboratory to specimens from the same patient) and demographic data (name, surname and  
40  
41 105 date of birth). The results were stratified according to the health districts, age and gender. For  
42  
43 106 the analysis of age, cases without recorded age or date of birth were excluded.  
44  
45  
46  
47  
48

49 108 Data was described using frequencies and proportions. Continuous data was described using  
50  
51 109 means, standard deviations (sd) and 95% confidence intervals (95% CI). Categorical outcomes  
52  
53 110 were tested using the chi-squared test. Log binomial regression of MDR and XDR-TB was  
54  
55 111 performed using sex, age group, district and year as predictors to estimate the adjusted relative  
56  
57 112 risk ratios. Data was analysed using Stata 14 (StataCorp., College Station, TX, USA).  
58  
59  
60

113

**114 Ethical consideration**

115 The data used for the study is routine data for management of TB patients; therefore, no  
116 individual patient consent was required. The ethical approval to perform the retrospective  
117 analysis was obtained from the Biomedical Research Ethics Committee of the University of  
118 KwaZulu-Natal (REF: BE085/12).

119

120

**Results**

121 Between 2011 and 2014, a total of 951 209 specimens were cultured for MTB in KwaZulu-  
122 Natal (Figure 1). The total number of specimens for which culture was requested, decreased  
123 annually with the average percentage difference (decline) of -14.2% [(95% CI -42.3% to  
124 13.9%) and (sd 11.3%)] per year. Similarly, the MTB positivity rate decreased by 6.0% (from  
125 15.6% to 9.6%) (Figure 2). After removing duplicates, there were 36644, 30208, 22568, 14672  
126 culture confirmed cases of TB in 2011, 2012, 2013 and 2014 respectively. The average  
127 percentage decline in total positive TB cases was 27.1% [(95% CI 3.5% to 50.7%) and (sd  
128 9.5%)] per year.

129 About 85% (88559) cases of culture positive TB had an LPA done to test for drug susceptibility  
130 against RIF and INH (Table 1). Of these, 19190 (21.7%) were resistant to INH and 18352  
131 (20.7%) were resistant to RIF. There were 953 RIF mono-resistant (RMR) cases in 2011, 767  
132 in 2012, 676 in 2013 and 667 in 2014. RMR refers to the proportion rifampicin resistant cases  
133 that are susceptible to INH. The RMR increased from 15.3% in 2011 to 21.4% in 2014. Over  
134 the same four-year period, there were 3396 (17.7%) INH mono-resistance (IMR) cases. IMR  
135 refers to the proportion INH resistant cases that are susceptible to rifampicin.

136 A steady decline of both MDR-TB and XDR-TB cases was noted, with an overall decline of  
137 49.2% (from 6901 in 2011 to 3506 in 2014) and 44.9% (from 706 in 2011 to 389 in 2014)

1  
2  
3 138 respectively (Table 2). The proportion of TB cases that had MDR-TB ranged from 18.8% in  
4  
5 139 2011 to 23.9% in 2014, with an overall average of 21%. The overall rate of XDR-TB among  
6  
7 140 MDR-TB cases was 11% (2336 XDR-TB cases out of 21221 MDR-TB).  
8  
9

10  
11 141 The majority of the TB cases were males; however, females constituted highest prevalence of  
12  
13 142 the DR-TB across all age groups (Figure 3 and 4). The number of MDR-TB cases was higher  
14  
15 143 among females than males until the age of 34, thereafter males had a higher number than  
16  
17 144 females. Similarly, for XDR-TB, females constituted the most number of XDR-TB. More than  
18  
19 145 60% of both MDR-TB and XDR-TB cases were patients between the ages of 25 and 44 years.  
20  
21 146 It was observed that children less than 5 years of age showed the lowest rates of MDR-TB  
22  
23 147 whilst that of XDR-TB was lowest between the ages of 6-14 years.  
24  
25  
26

27  
28 148 Over the 4-year period, eThekweni district had the highest number of TB cases with 47.5% of  
29  
30 149 all cases in KZN coming from this district (Table 2). However, the districts with the highest  
31  
32 150 yearly proportion of MDR-TB cases each year were Umkhanyakude [(mean 33.2%, sd 2.3%),  
33  
34 151 (95% CI 29.5% to 36.9%)] followed by Zululand [(mean 28.1%, sd 2.3), (95% CI 24.4% to  
35  
36 152 31.8%)] and Harry Gwala [(mean 26.2%, sd 9.4), (95% CI 11.2% to 41.2%)]. The yearly  
37  
38 153 proportion of MDR-TB cases that had XDR-TB were highest at Umzinyathi [(mean 36.4%, sd  
39  
40 154 5.8%), (95% CI 27.2% to 45.6%)] followed by eThekweni [(mean 13.7%, sd 1.1%), (95% CI  
41  
42 155 11.9% to 15.5%)] and Uthukela [(mean 13.2%, sd 5.7%), (95% CI 4.1% to 22.3%)] districts.  
43  
44 156 Umkhanyakude district had the lowest proportion of XDR-TB with a yearly mean of 3.4% [(sd  
45  
46 157 2.4%), (95% CI -0.4% to 7.2%)] over the study period (Figure 5).  
47  
48  
49  
50

51  
52 158

53  
54  
55 159

## Discussion

1  
2  
3 160 In this study we observe a decline in the number of samples processed for MTB culture and  
4  
5 161 culture positivity rate which coincided, with the roll out of the Xpert. This is in keeping with  
6  
7 162 the Xpert roll out which started in March 2011 and was completed in September 2013 when  
8  
9 163 all health facilities in the provinces were using the Xpert for TB diagnosis. According to the  
10  
11 164 South African guidelines, MTB culture is not recommended for Xpert rifampicin susceptible  
12  
13 165 patients, which constitutes the majority of patients infected with TB, hence the decline in the  
14  
15 166 number of MTB cultures from 277 963 in 2011 to 172 671 in 2014. Nevertheless, the sheer  
16  
17 167 volumes of MTB cultures are still enormous which reflects the overwhelming burden of DR  
18  
19 168 TB in this region. Prior to Xpert introduction, drug susceptibility testing for MTB was only  
20  
21 169 performed on patients that were considered to be at risk of DR TB, but the use of Xpert for  
22  
23 170 initial diagnosis of TB enables screening for rifampicin resistance in all patients. The revised  
24  
25 171 indications for culture selects for cases that are more likely to have drug resistant (Xpert  
26  
27 172 rifampicin resistant TB) and paucibacillary TB (extra-pulmonary TB and HIV positive Xpert  
28  
29 173 negative), which explains the high rates of DR TB and declining culture positivity rate observed  
30  
31 174 in this study.  
32  
33  
34  
35  
36  
37  
38  
39

40 176 Rifampicin is always used in combination with other drugs in the treatment of TB in SA. In  
41  
42 177 addition, spontaneously occurring mutations are rare compared to other TB drugs [8].  
43  
44 178 Consequently, the development of RMR is expected to be uncommon. The finding of  
45  
46 179 increasing mono-resistance in this context is therefore concerning. In a previous study done by  
47  
48 180 Coovadia *et al*, at the same laboratory, RMR was 8.8% during the years 2007-2009 [9].  
49  
50 181 Similarly, Mukinda *et al* reported increasing RMR in the Western Cape province of SA [10].  
51  
52 182 These findings highlight the importance of testing for INH resistance in all patients with Xpert  
53  
54 183 rifampicin resistance. This positively impacts patient management further as patients with  
55  
56  
57  
58  
59  
60

1  
2  
3 184 confirmed rifampicin mono-resistance could benefit by using isoniazid in their treatment  
4  
5 185 regimen.  
6  
7

8 186

9  
10 187 The development of rifampicin resistance has serious effects on the treatment of TB. Patients  
11  
12 188 have to be treated with more expensive and more toxic drugs for a longer duration. Studies  
13  
14 189 have been conducted in order to elucidate the causes of RMR with the majority reporting an  
15  
16 190 association between HIV and RMR [11-12]. Factors contributing to this association include  
17  
18 191 decreased drug bioavailability, and drug- drug interactions which lead to decreased rifampicin  
19  
20 192 serum levels [13]. Furthermore, advanced immunosuppression increases susceptibility to  
21  
22 193 infection and permits proliferation of TB which favours transmission [14]. Given the high rate  
23  
24 194 of TB/HIV co-infection in our setting, it is possible that HIV may be contributing to the  
25  
26 195 increasing rate of RMR. Whether using a higher dose of rifampicin proves to be beneficial in  
27  
28 196 co-infected patients remains under investigation.  
29  
30

31 197

32  
33  
34  
35 198 Rifampicin and INH are core drugs that form the backbone for first line short course therapy  
36  
37 199 for the treatment of drug susceptible TB. Given the high burden of disease in this region  
38  
39 200 coupled with the use of Xpert as a screening tool for DR-TB, mono-resistance to INH may  
40  
41 201 inevitably be overlooked. According to the national TB algorithm, a diagnosis of IMR TB is  
42  
43 202 only made using TB culture and DST following a negative Xpert result or treatment failure.  
44  
45 203 The use of standard first line TB therapy in patients with undetected INH resistance equates to  
46  
47 204 using rifampicin monotherapy during the continuation phase. This may subsequently lead to  
48  
49 205 the development of MDR-TB. This was described in a study done by Jacobson *et al* where  
50  
51 206 treatment of patients with IMR using standard first line therapy was associated with poor  
52  
53 207 outcomes and progression to MDR-TB [15]. Several studies have reported previous TB therapy  
54  
55  
56  
57  
58  
59  
60



1  
2  
3 208 as a risk factor for IMR [16-17]. Identifying risk factors for IMR could help to select patients  
4  
5 209 who may require TB culture and DST in order to exclude INH resistance.  
6  
7

8 210

9  
10 211 There was an overall decline in the numbers of MDR (from 6901 in 2011 to 3506 in 2014) and  
11  
12 212 XDR-TB (from 706 in 2011 to 389 in 2014) cases identified using culture. This was in contrast  
13  
14 213 to the increasing number of MDR/RR-TB cases following the introduction of the Xpert in  
15  
16 214 South Africa during this time [18-20]. Perhaps a plausible explanation is that, contrary to the  
17  
18 215 national guidelines, a significant number of patients with Xpert rifampicin resistant TB did not  
19  
20 216 get a subsequent MTB culture for confirmation. This was supported by the 2016 WHO TB  
21  
22 217 report, which reported the percentage of MDR-TB among MDR/RR-TB as 62% in South  
23  
24 218 Africa. This suggests that a substantial number of Xpert rifampicin resistant TB cases are not  
25  
26 219 confirmed by culture because this discrepancy cannot be explained by RMR cases [1]. Another  
27  
28 220 possible reason may be due to patients that are lost to follow up. In KZN province, the specimen  
29  
30 221 for TB culture is only collected when the patient comes back for Xpert results. Consequently,  
31  
32 222 if patients did not return for the results, then specimens for TB culture would not have been  
33  
34 223 collected. According to the WHO, only 41% of notified MDR/RR-TB cases from South Africa  
35  
36 224 were enrolled for MDR-TB treatment in 2013[18]. Although this figure improved to 62% in  
37  
38 225 2014 [20], the gap remains substantial especially given the considerable improvement in  
39  
40 226 rapidity of diagnosing DR-TB with Xpert. Therefore, this decline in culture confirmed DR-  
41  
42 227 TB indicates a change in the testing method used to diagnose tuberculosis rather than a  
43  
44 228 successful TB control program, which led to underestimation of MDR-TB and XDR-TB cases  
45  
46 229 in this study. The proportion of MDR-TB cases that have XDR-TB remained constant at about  
47  
48 230 11% which is comparable to the global trends at that time [18-20].  
49  
50  
51  
52  
53  
54  
55  
56 231  
57  
58  
59  
60

1  
2  
3 232 Our study found higher rates of DR-TB in women compared to men which supports findings  
4  
5 233 from other studies showing higher proportions of DR-TB in women [21-22]. Even though  
6  
7  
8 234 reasons behind the higher DR-TB predisposition among women are unknown, HIV could be a  
9  
10 235 contributing factor. The majority of DR-TB cases were found between the ages of 15 and 44  
11  
12 236 years, which is the same age group that is known to have the highest HIV prevalence [2]. It is  
13  
14  
15 237 well recognised that HIV is a major risk factor for development of TB and HAART reduces its  
16  
17 238 incidence [23-25]. Indeed, Nanoo *et al* showed an inverse relationship between antiretroviral  
18  
19 239 therapy coverage and the incidence of microbiologically confirmed TB in South Africa, with  
20  
21 240 the greatest decline demonstrated in the 25-44 year age group [26].  
22  
23

24 241  
25  
26 242 The diagnosis of DR-TB in children is generally difficult due to their inability to expectorate  
27  
28 243 and the paucibacillary nature of childhood TB. Consequently, DR data is limited, but since TB  
29  
30 244 in children is largely as a result of primary transmission from adults, the proportion of DR-TB  
31  
32 245 is reported to be similar to that of adults [27-28]. Herein, we observed lower rates of DR-TB  
33  
34 246 particularly MDR-TB in children less than five years compared to adults which could be a  
35  
36 247 reflection of the under diagnosis of DR-TB in this age group. Although these rates are lower in  
37  
38 248 children, they are still unacceptable as they reflect transmission of untreated adult TB.  
39  
40  
41

42 249  
43  
44 250 Similar to the overall burden of TB in South Africa, DR-TB is also concentrated in urban areas  
45  
46 251 of KZN with eThekweni district harbouring most of the cases due to high population density.  
47  
48 252 However, the rate of MDR-TB cases was highest among the northern districts of the province  
49  
50 253 of Umkhanyakude and Zululand. These are rural districts which share borders with  
51  
52 254 Mpumalanga province, Swaziland and Mozambique, thus migration may influence resistance  
53  
54 255 patterns. Mpumalanga province is known to have the highest DR-TB rate in the country while  
55  
56 256 Swaziland has the highest MDR-TB prevalence in Africa [29-30]. In 2007, Wallengren *et al*  
57  
58  
59  
60

1  
2  
3 257 reported Umzinyathi and Umkhanyakude as the districts with the highest MDR-TB rates [31].  
4  
5 258 The intervention given to the Umzinyathi district following the outbreak of XDR-TB in 2005  
6  
7  
8 259 (Intensive case finding, early diagnosis and initiation treatment for TB, early diagnosis and  
9  
10 260 treatment of HIV, TB infection control and intergration of TB and HIV care) may be  
11  
12 261 responsible for these decreasing rates [32]. Despite declining XDR-TB rates at the Umzinyathi  
13  
14 262 district (where the XDR-TB outbreak was identified in 2005), it still remains the district with  
15  
16  
17 263 the highest XDR-TB rates at about three times higher than the rest of KZN [33].  
18  
19  
20  
21

### 22 265 **Limitations**

23  
24 266 Our study is limited by the retrospective design; the accuracy of the data is dependent on  
25  
26 267 available information on the LIS. The absence of unique patient identifiers also affects the  
27  
28 268 accuracy of the data as the removal of duplicates is imperfect. Although duplicates were  
29  
30 269 removed, we could not differentiate between new and known MDR-TB patients. The patient  
31  
32  
33 270 level Xpert data was not available in order to match with the TB culture results. Nevertheless,  
34  
35 271 the high burden of DR-TB and the fact that all cultures are performed in one laboratory for the  
36  
37 272 whole province provide an important insight to the distribution of TB in this region and may  
38  
39  
40 273 inform targeted intervention.  
41

42 274 Although the data used for this study is relatively old, it represents a critical time of drastic  
43  
44 275 changes in the diagnosis of DR-TB. There have been no subsequent changes in the TB  
45  
46 276 diagnostic algorithm, therefore the findings highlighted in this study should still be relevant to  
47  
48  
49 277 the current setting.  
50

51 278

### 54 279 **Conclusions**

55  
56 280 Our findings highlight the importance of DR-TB diagnostic algorithms that include both  
57  
58 281 rifampicin and isoniazid DST in the initial testing. Early detection of RMR will allow addition  
59  
60

1  
2  
3 282 of isoniazid in the treatment regimen, while detection of IMR will prevent rifampicin  
4  
5 283 monotherapy later on during the continuation phase of treatment which has been associated  
6  
7  
8 284 with development of rifampicin resistance. This will also allow us to have a clearer estimate of  
9  
10 285 MDR-TB cases. HIV and migration play a significant role in the distribution of DR-TB in this  
11  
12 286 region, therefore TB control measures that address these factors may have impact on DR-TB  
13  
14  
15 287 level.  
16  
17

18 288

19  
20  
21 289

### Acknowledgments

22  
23  
24 290 We thank the staff at the Inkosi Albert Luthuli Central Hospital TB laboratory for their  
25  
26 291 dedication and hard work. We also thank Thandi Kapwata from the Environment and Health  
27  
28 292 Research Unit within the South African Medical Research Council, for designing the provincial  
29  
30  
31 293 maps.  
32  
33

34 294

35  
36  
37 295

### Author contributions

38  
39  
40 296 NRM contributed in the development of the concept, study design, data analysis and writing  
41  
42 297 of the manuscript. YB performed data analysis and assisted with the writing of the manuscript.  
43  
44 298 KL contributed in the interpretation of data and writing of the manuscript. KM supervised the  
45  
46 299 development of the study concept, study design, data analysis and manuscript writing.  
47  
48  
49

50 300

51  
52  
53 301 **Data sharing statement:** No data are available.  
54  
55

56 302 **Competing interests:** None  
57  
58

59 303 **Funding:** None  
60

304

305

306

307

308

309

310

311

312

313

314

315

316

317

318

319

320

321

322

323

324

325

326

327

## References

1. World Health Organization. Global Tuberculosis Report 2018. [https://www.who.int/tb/publications/global\\_report/gtbr2018\\_main\\_text\\_28Feb2019.pdf?ua=1](https://www.who.int/tb/publications/global_report/gtbr2018_main_text_28Feb2019.pdf?ua=1)
2. Gandhi NR, *et al.* Extensively drug-resistant tuberculosis as a cause of death in patients co-infected with tuberculosis and HIV in a rural area of South Africa. *The Lancet* 2006; 368: 1575-1580.
3. Ndjeka N. National Department of Health. Multi-drug resistant tuberculosis: strategic overview on MDR-TB care in South Africa. 2014. [https://www.health-e.org.za/wp-content/uploads/2014/03/Strategic\\_overview\\_of\\_MDR\\_TB\\_RSA.pdf](https://www.health-e.org.za/wp-content/uploads/2014/03/Strategic_overview_of_MDR_TB_RSA.pdf).
4. Hassim S, *et al.* Detection of a substantial rate of multidrug-resistant tuberculosis in an HIV-infected population in South Africa by active monitoring of sputum samples. *Clinical Infectious Disease* 2010; 50: 1053-1059.
5. Helb D, *et al.* Rapid detection of *Mycobacterium tuberculosis* and rifampin resistance by use of on-demand, near-patient technology. *Journal of Clinical Microbiology* 2010; 48: 229-237.

- 1  
2  
3 328 6. Boehme CC, *et al.* Rapid molecular detection of tuberculosis and rifampin resistance.  
4  
5 329 *New England Journal of Medicine* 2010; 363: 1005-1015.  
6  
7  
8 330  
9  
10 331 7. National Department of Health, South Africa. National tuberculosis management  
11  
12 332 guidelines. 2014.  
13  
14  
15 333 [https://www.health-e.org.za/wp-content/uploads/2014/06/NTCP\\_Adult\\_TB-](https://www.health-e.org.za/wp-content/uploads/2014/06/NTCP_Adult_TB-)  
16  
17 334 [Guidelines-27.5.2014.pdf](https://www.health-e.org.za/wp-content/uploads/2014/06/NTCP_Adult_TB-Guidelines-27.5.2014.pdf)  
18  
19  
20  
21 335  
22  
23  
24 336 8. McGrath M, *et al.* Mutation rate and the emergence of drug resistance in  
25  
26 337 *Mycobacterium tuberculosis*. *Journal of Antimicrobial Chemotherapy* 2014; 69: 292–  
27  
28 338 302  
29  
30  
31 339  
32  
33 340 9. Coovadia YM, *et al.* Rifampicin mono-resistance in *Mycobacterium tuberculosis* in  
34  
35 341 KwaZulu-Natal, South Africa: a significant phenomenon in a high prevalence TB-HIV  
36  
37 342 region. *PLOS ONE*. 2013, 8: e77712.  
38  
39  
40 343  
41  
42 344 10. Mukinda FK, *et al.* Rise in rifampicin-monoresistant tuberculosis in Western Cape,  
43  
44 345 South Africa. *International Journal of Tuberculosis and Lung Disease* 2012; 16: 196–  
45  
46 346 202.  
47  
48  
49 347  
50  
51 348 11. Sharling L, *et al.* Rifampin-Resistant Tuberculosis in The United States, 1998-2014.  
52  
53 349 *Clinical Infectious Diseases* 2019; ciz491. <https://doi.org/10.1093/cid/ciz491>  
54  
55  
56  
57 350  
58  
59  
60

- 1  
2  
3 351 12. Villegas L, *et al.* Prevalence, risk factors, and treatment outcomes of isoniazid and  
4  
5 352 rifampicin mono-resistant pulmonary tuberculosis in Lima, Peru. *PLOS ONE* 2016; 11:  
6  
7 353 e0152933.  
8  
9  
10 354  
11  
12 355 13. Gurumurthy P, *et al.* Malabsorption of rifampicin and isoniazid in HIV infected patients  
13  
14 356 with and without tuberculosis. *Clinical Infectious Disease* 2004; 38: 280–283.  
15  
16  
17 357  
18  
19  
20  
21 358 14. Bifani P, *et al.* The evolution of drug resistance in *Mycobacterium tuberculosis*: from  
22  
23 359 a mono-rifampin-resistant cluster into increasingly multidrug-resistant variants in an  
24  
25 360 HIV-seropositive population. *Journal of Infectious Disease* 2008; 198: 90–94.  
26  
27  
28 361  
29  
30 362 15. Jacobson KR, *et al.* Treatment outcomes of isoniazid-resistant tuberculosis patients,  
31  
32 363 Western Cape province, South Africa. *Clinical Infectious Disease* 2011; 53: 369–372.  
33  
34  
35 364  
36  
37  
38  
39 365 16. Cattamanchi A, *et al.* Clinical characteristics and treatment outcomes of isoniazid  
40  
41 366 mono-resistant tuberculosis. *Clinical Infectious Disease* 2009; 48: 179–185.  
42  
43 367  
44  
45 368 17. Fox L, *et al.* Comparison of isoniazid monoresistant tuberculosis with drug-susceptible  
46  
47 369 tuberculosis and multidrug-resistant tuberculosis. *European Journal of Clinical*  
48  
49 370 *Microbiology & Infectious Diseases* 2011; 30: 863-867.  
50  
51  
52 371  
53  
54  
55 372 18. World Health Organization. Global Tuberculosis Report. 2013  
56  
57 373 a. [http://apps.who.int/iris/bitstream/10665/91355/1/9789241564656\\_eng.pdf](http://apps.who.int/iris/bitstream/10665/91355/1/9789241564656_eng.pdf)  
58  
59 374  
60

- 1  
2  
3 375 19. World Health Organization. Global Tuberculosis Report 2014.  
4  
5  
6 376 a. [http://apps.who.int/iris/bitstream/10665/137094/1/9789241564809\\_eng.pdf](http://apps.who.int/iris/bitstream/10665/137094/1/9789241564809_eng.pdf)  
7  
8  
9 377  
10  
11  
12 378 20. World Health Organization. Global Tuberculosis Report. 2015  
13  
14  
15 379 a. [http://apps.who.int/iris/bitstream/10665/191102/1/9789241565059\\_eng.pdf](http://apps.who.int/iris/bitstream/10665/191102/1/9789241565059_eng.pdf)  
16  
17  
18 380  
19  
20  
21  
22 381 21. O'Donnell MR, *et al.* Extensively drug-resistant tuberculosis in women, KwaZulu-  
23  
24 382 Natal, South Africa. *Emerging Infectious Disease* 2011; 17: 1942–1945.  
25  
26 383  
27  
28 384 22. Cox HS, *et al.* Multidrug-resistant tuberculosis in Central Asia. *Emerging Infectious*  
29  
30 385 *Disease* 2004; 10: 865–872.  
31  
32  
33 386  
34  
35  
36  
37 387 23. Sonnenberg P, *et al.* How soon after infection with HIV does the risk of tuberculosis  
38  
39 388 start to increase? A retrospective cohort study in South African gold miners. *Journal of*  
40  
41 389 *Infectious Disease* 2005 15; 191: 150-158.  
42  
43  
44 390  
45  
46  
47  
48 391 24. Badri M, *et al.* Association between tuberculosis and HIV disease progression in a high  
49  
50 392 tuberculosis prevalence area. *International Journal of Tuberculosis and Lung Disease*  
51  
52 393 2001; 5: 225–232.  
53  
54  
55 394  
56  
57  
58  
59  
60



- 1  
2  
3 395 25. Badri M, *et al.* Effect of highly active antiretroviral therapy on incidence of tuberculosis  
4  
5 396 in South Africa: a cohort study. *Lancet* 2002; 359: 2059–2064.  
6  
7  
8  
9 397  
10  
11  
12 398 26. Nanoo A, *et al.* Nationwide and regional incidence of microbiologically confirmed  
13  
14 399 pulmonary tuberculosis in South Africa, 2004–12: a time series analysis. *Lancet*  
15  
16 400 *Infectious Disease* 2015; 15: 1066–1076.  
17  
18  
19 401  
20  
21 402 27. Schaaf HS, *et al.* Surveillance of anti-tuberculosis drug resistance among children from  
22  
23 403 the Western Cape Province of South Africa—an upward trend. *American Journal of*  
24  
25 404 *Public Health* 2009; 99: 1486-1490.  
26  
27  
28  
29 405  
30  
31  
32 406 28. Zignol M, *et al.* Multidrug-resistant tuberculosis in children: evidence from global  
33  
34 407 surveillance. *European Respiratory Journal* 2013; 42: 701–707.  
35  
36 408  
37  
38  
39 409 29. Andrews JR, *et al.* Multidrug-resistant and extensively drug-resistant tuberculosis:  
40  
41 410 implications for the HIV epidemic and antiretroviral therapy rollout in South Africa.  
42  
43 411 *Journal of Infectious Disease* 2007; 196: S482-S490.  
44  
45  
46 412  
47  
48  
49 413 30. Sanchez-Padilla E, *et al.* High prevalence of multidrug-resistant tuberculosis,  
50  
51 414 Swaziland, 2009–2010. *Emerging Infectious Diseases* 2012; 18: 29–37.  
52  
53  
54  
55 415  
56  
57  
58  
59  
60

- 1  
2  
3 416 31. Wallengren K, *et al.* Drug-resistant tuberculosis, KwaZulu-Natal, South Africa, 2001–  
4  
5 417 2007. *Emerging Infectious Diseases* 2011; 17: 1913-1916.  
6  
7  
8 418  
9  
10 419 32. Bateman C. Tugela Ferry's extensively drug-resistant tuberculosis – 10 years on.  
11  
12 420 *South African Medical Journal* 2015;105: 517-520.  
13  
14  
15 421  
16  
17  
18 422 33. Lim JR, *et al.* Incidence and geographic distribution of extensively drug resistant  
19 423 tuberculosis in KwaZulu-Natal province, South Africa. *PLOS ONE* 2015; 10:  
20 424 e0132076.  
21  
22  
23  
24  
25 425  
26 426  
27  
28  
29  
30 427  
31  
32

33 **Table 1. LPA results between 2011 and 2014: RIF and INH mono-resistance\***

|                                            | 2011  | 2012  | 2013  | 2014  |
|--------------------------------------------|-------|-------|-------|-------|
| <b>Total culture positives</b>             | 36644 | 30208 | 22568 | 14672 |
| <b>Total cases LPA</b>                     | 31368 | 26513 | 18399 | 12279 |
| <b>% of LPA done</b>                       | 85.6  | 87.8  | 81.5  | 83.7  |
| <b>LPA Any INH Resistance</b>              | 6430  | 5548  | 4167  | 3045  |
| <b>LPA Any INH Resistance (%)</b>          | 20.5  | 20.9  | 22.7  | 24.8  |
| <b>LPA INH MR</b>                          | 845   | 1167  | 879   | 505   |
| <b>LPA INH MR (% of All INH Resistant)</b> | 13.8  | 21.0  | 21.1  | 17.1  |
| <b>LPA Any RIF Resistance</b>              | 6293  | 5013  | 3912  | 3134  |
| <b>LPA Any RIF Resistance (%)</b>          | 20.1  | 18.9  | 21.3  | 25.5  |
| <b>LPA RIF MR</b>                          | 953   | 767   | 676   | 667   |
| <b>LPA RIF MR (% of All RIF Resistant)</b> | 15.1  | 15.3  | 17.3  | 21.3  |

34  
35  
36  
37  
38  
39  
40  
41  
42  
43  
44  
45  
46  
47  
48  
49  
50  
51  
52  
53 428 \*RIF, Rifampicin; INH, isoniazid; LPA, line probe assay; MR, mono-resistance  
54  
55 429  
56  
57  
58  
59  
60

Table 2. Total TB positive, MDR and XDR cases per district for each year.

| District      | 2011            |      |      |     |      | 2012            |      |      |     |      | 2013            |      |      |     |      | 2014            |      |      |     |      |
|---------------|-----------------|------|------|-----|------|-----------------|------|------|-----|------|-----------------|------|------|-----|------|-----------------|------|------|-----|------|
|               | Total positives | MDR  | %    | XDR | %    | Total positives | MDR  | %    | XDR | %    | Total positives | MDR  | %    | XDR | %    | Total positives | MDR  | %    | XDR | %    |
| Amajuba       | 597             | 96   | 16.1 | 8   | 8.3  | 523             | 86   | 16.4 | 4   | 4.7  | 353             | 40   | 11.3 | 4   | 10.0 | 272             | 35   | 12.9 | 0   | 0.0  |
| Ethekwini     | 17519           | 2837 | 16.2 | 353 | 12.4 | 13453           | 2306 | 17.1 | 338 | 14.7 | 11118           | 2212 | 19.9 | 321 | 14.5 | 7404            | 1516 | 20.5 | 203 | 13.4 |
| Harry Gwala   | 776             | 124  | 16.0 | 5   | 4.0  | 752             | 191  | 25.4 | 13  | 6.8  | 526             | 186  | 35.4 | 4   | 2.2  | 396             | 142  | 35.9 | 12  | 8.5  |
| Ilembe        | 1704            | 269  | 15.8 | 9   | 3.3  | 1219            | 206  | 16.9 | 16  | 7.8  | 978             | 180  | 18.4 | 7   | 3.9  | 405             | 76   | 18.8 | 6   | 7.9  |
| Ugu           | 2172            | 542  | 25.0 | 37  | 6.8  | 2443            | 465  | 19.0 | 47  | 10.1 | 1655            | 388  | 23.4 | 34  | 8.8  | 1123            | 268  | 23.9 | 12  | 4.5  |
| Umgungundlovu | 3514            | 520  | 14.8 | 55  | 10.6 | 2858            | 532  | 18.6 | 57  | 10.7 | 1486            | 305  | 20.5 | 27  | 8.9  | 703             | 159  | 22.6 | 22  | 13.8 |
| Umkhanyakude  | 2230            | 732  | 32.8 | 5   | 0.7  | 1619            | 501  | 30.9 | 29  | 5.8  | 1214            | 422  | 34.8 | 15  | 3.6  | 945             | 341  | 36.1 | 19  | 5.6  |
| Umzinyathi    | 1478            | 334  | 22.6 | 134 | 40.1 | 1295            | 257  | 19.8 | 102 | 39.7 | 894             | 192  | 21.5 | 66  | 34.4 | 674             | 196  | 29.1 | 54  | 27.6 |
| Uthukela      | 1100            | 120  | 10.9 | 16  | 13.3 | 1023            | 111  | 10.9 | 13  | 11.7 | 545             | 71   | 13.0 | 6   | 8.5  | 261             | 55   | 21.1 | 12  | 21.8 |
| Uthungulu     | 2640            | 589  | 22.3 | 30  | 5.1  | 2737            | 590  | 21.6 | 41  | 6.9  | 2315            | 477  | 20.6 | 26  | 5.5  | 1178            | 294  | 25.0 | 12  | 4.1  |
| Zululand      | 2888            | 735  | 25.5 | 54  | 7.3  | 2259            | 662  | 29.3 | 37  | 5.6  | 1468            | 428  | 29.2 | 34  | 7.9  | 1168            | 362  | 31.0 | 28  | 7.7  |

|         |       |      |      |     |      |       |      |      |     |      |       |      |      |     |      |       |      |      |     |      |
|---------|-------|------|------|-----|------|-------|------|------|-----|------|-------|------|------|-----|------|-------|------|------|-----|------|
| Unknown | 26    | 3    | 11.5 | 0   | 0.0  | 27    | 5    | 18.5 | 0   | 0.0  | 16    | 1    | 6.3  | 0   | 0.0  | 143   | 62   | 43.4 | 9   | 14.5 |
| Total   | 36644 | 6901 | 18.8 | 706 | 10.2 | 30208 | 5912 | 19.6 | 697 | 11.8 | 22568 | 4902 | 21.7 | 544 | 11.1 | 14672 | 3506 | 23.9 | 389 | 11.1 |

430

431

\* MDR, multidrug-resistant; XDR, extensively drug-resistant; TB, tuberculosis

For peer review only

1  
2  
3  
4  
5  
6  
7  
8  
9  
10  
11  
12  
13  
14  
15  
16  
17  
18  
19  
20  
21  
22  
23  
24  
25  
26  
27  
28  
29  
30  
31  
32  
33  
34  
35  
36  
37  
38  
39  
40  
41  
42  
43  
44  
45  
46

1  
2  
3 432 Figure 1: Flow diagram showing the number of specimens received and the laboratory  
4  
5 433 procedures performed at the TB culture laboratory.  
6  
7

8  
9 434 Figure 2: TB culture specimens processed between 2011 and 2014. The figure shows the total  
10  
11 435 number of specimens received and the total number (and percentage) thereof that were positive.  
12  
13

14 436 Figure 3: Distribution of MDR-TB cases and proportions by gender. The number of MDR-TB  
15  
16 437 cases (represented by bars) by gender and the percentage (represented by lines) that is MDR-  
17  
18 438 TB of total positive cases by gender  
19  
20

21  
22 439 Figure 4: Distribution of XDR-TB cases and proportions by gender. The number of XDR-TB  
23  
24 440 cases (represented by bars) by gender and the percentage (represented by lines) that is XDR-  
25  
26 441 TB of total positive cases by gender.  
27  
28

29  
30 442 Figure 5: The first panel depicts the percentage of MDR-TB cases per district for the period  
31  
32 443 2011 – 2014. The percentage of MDR-TB cases among TB cases diagnosed by culture between  
33  
34 444 2011 and 2014. The size of the circle represents the percentage. The second panel depicts the  
35  
36 445 percentage of XDR-TB cases per district for the period 2011 – 2014. The percentage of XDR-  
37  
38 446 TB cases among MDR-TB cases diagnosed by culture between 2011 and 2014. The map was  
39  
40  
41 447 produced specifically for the purposes of this study, it is therefore not under copyright.  
42  
43  
44  
45  
46  
47  
48  
49  
50  
51  
52  
53  
54  
55  
56  
57  
58  
59  
60

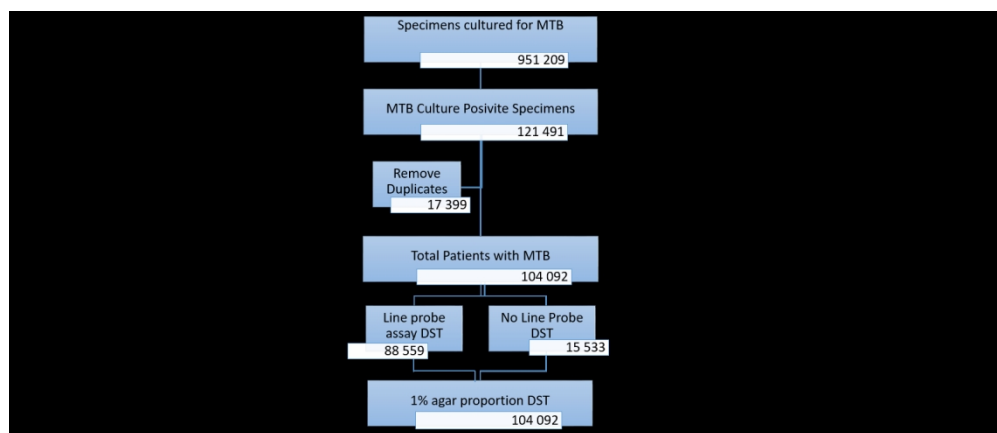

Flow diagram showing the number of specimens received and the laboratory procedures performed at the TB culture laboratory.

292x124mm (150 x 150 DPI)

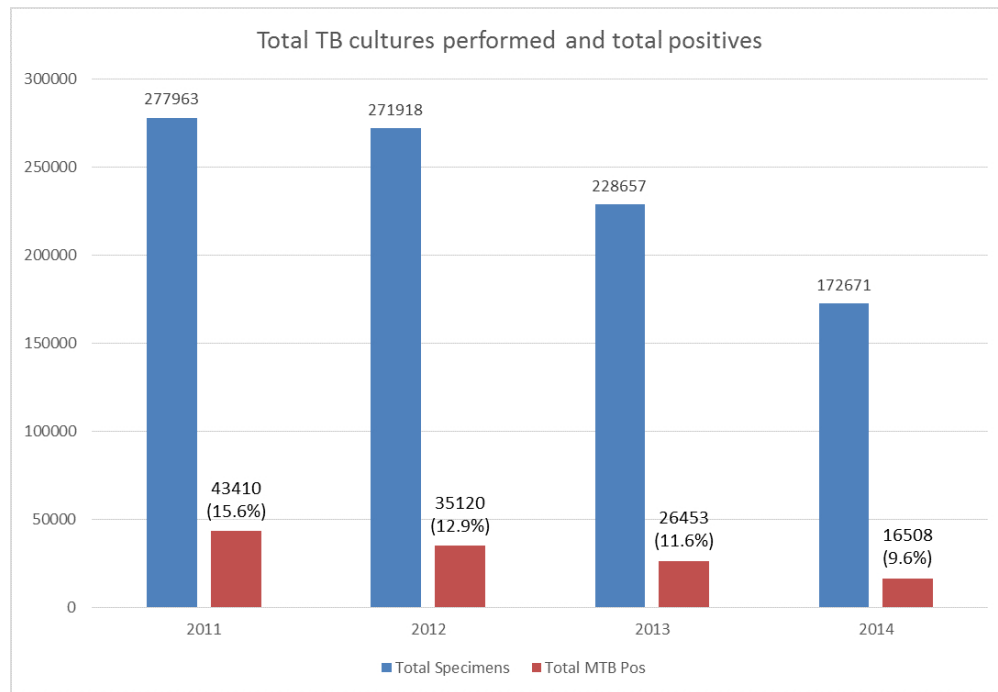

29 TB culture specimens processed between 2011 and 2014. The figure shows the total number of specimens  
30 received and the total number (and percentage) thereof that were positive.

31 184x127mm (150 x 150 DPI)

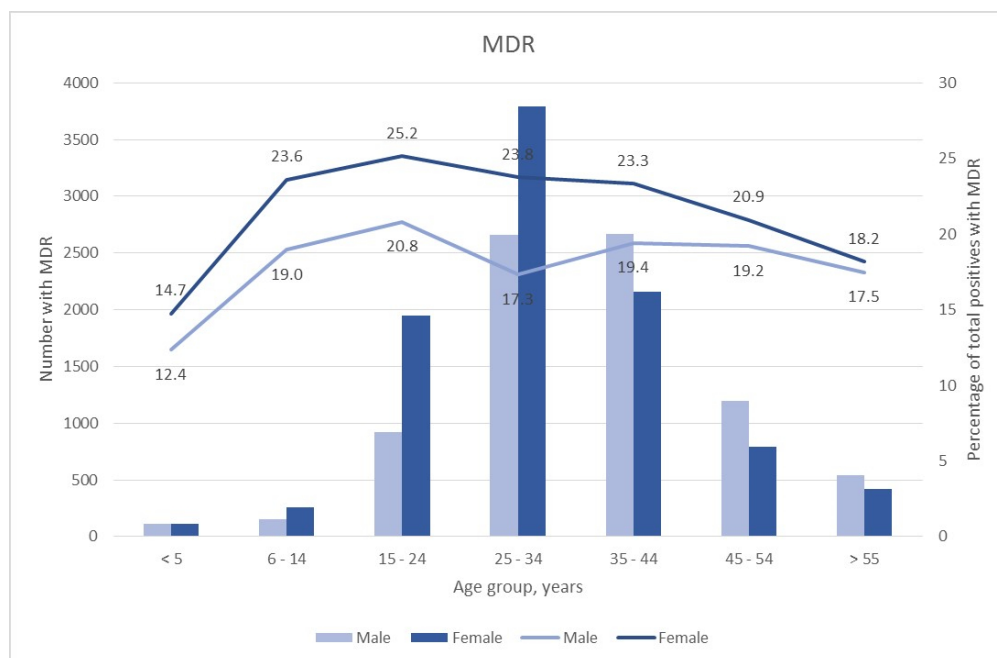

Distribution of MDR-TB cases and proportions by gender. The number of MDR-TB cases (represented by bars) by gender and the percentage (represented by lines) that is MDR-TB of total positive cases by gender

184x120mm (150 x 150 DPI)



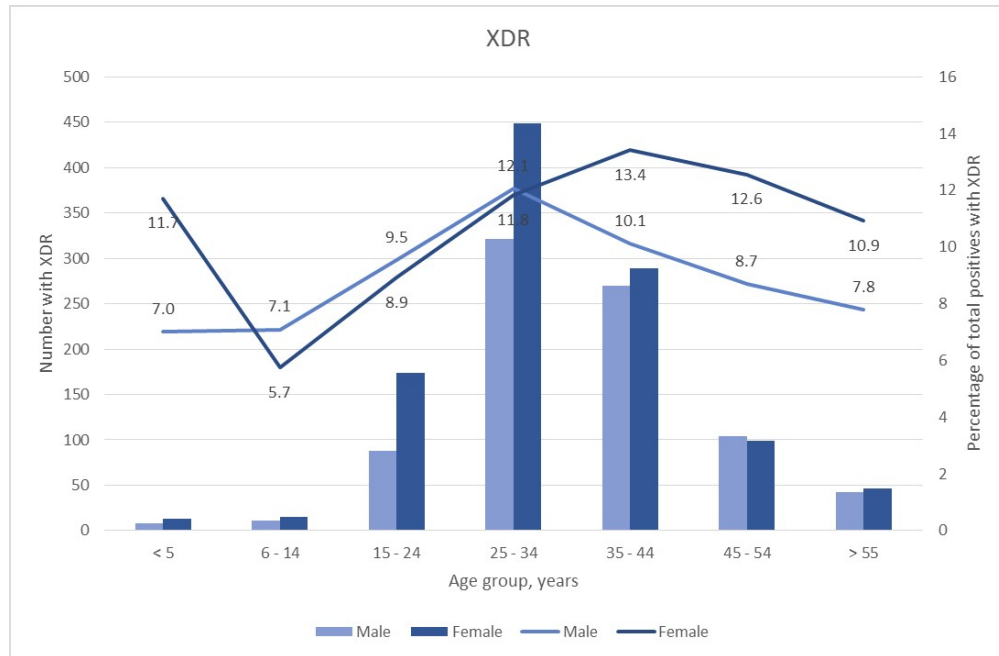

Distribution of XDR-TB cases and proportions by gender. The number of XDR-TB cases (represented by bars) by gender and the percentage (represented by lines) that is XDR-TB of total positive cases by gender.

184x120mm (150 x 150 DPI)

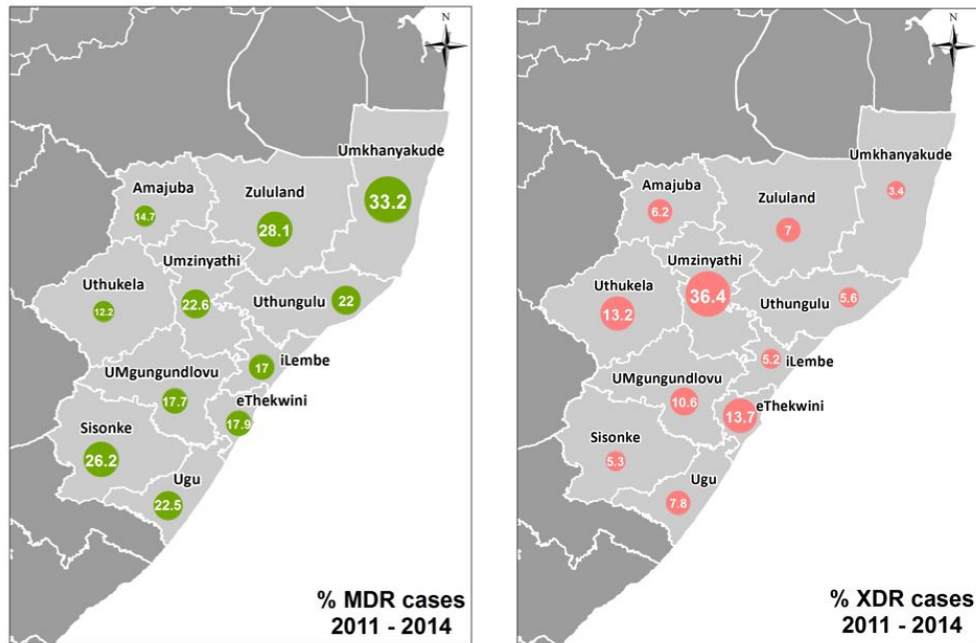

The first panel depicts the percentage of MDR-TB cases per district for the period 2011 – 2014. The percentage of MDR-TB cases among TB cases diagnosed by culture between 2011 and 2014. The size of the circle represents the percentage. The second panel depicts the percentage of XDR-TB cases per district for the period 2011 – 2014. The percentage of XDR-TB cases among MDR-TB cases diagnosed by culture between 2011 and 2014. The map was produced specifically for the purposes of this study, it is therefore not under copyright.

252x168mm (96 x 96 DPI)

STROBE Statement—checklist of items that should be included in reports of observational studies

|                           | Item No. | Recommendation                                                                                                                                                                                | Page No.   | Relevant text from manuscript                                                                                                                                                                                                                                                                                                                                                                                                                                                                                                                                                                                                                                                                                                                                                                                                                           |
|---------------------------|----------|-----------------------------------------------------------------------------------------------------------------------------------------------------------------------------------------------|------------|---------------------------------------------------------------------------------------------------------------------------------------------------------------------------------------------------------------------------------------------------------------------------------------------------------------------------------------------------------------------------------------------------------------------------------------------------------------------------------------------------------------------------------------------------------------------------------------------------------------------------------------------------------------------------------------------------------------------------------------------------------------------------------------------------------------------------------------------------------|
| <b>Title and abstract</b> | 1        | (a) Indicate the study’s design with a commonly used term in the title or the abstract<br>(b) Provide in the abstract an informative and balanced summary of what was done and what was found | 2<br><br>2 | Retrospective observational study<br><br>We analysed data for all MTB cultures performed in the KwaZulu-Natal province between 2011 and 2014.<br>Our findings show increasing rifampicin mono-resistance and a substantial amount of INH mono-resistance.<br>Although DR-TB is widespread, HIV and migration influence its distribution.                                                                                                                                                                                                                                                                                                                                                                                                                                                                                                                |
| <b>Introduction</b>       |          |                                                                                                                                                                                               |            |                                                                                                                                                                                                                                                                                                                                                                                                                                                                                                                                                                                                                                                                                                                                                                                                                                                         |
| Background/rationale      | 2        | Explain the scientific background and rationale for the investigation being reported                                                                                                          | 3-5        | Xpert replaced smear microscopy in the initial diagnosis of TB and all patients that do not demonstrate rifampicin resistance are assumed to have drug susceptible TB and therefore initiated on standard first line TB therapy. Thus, Xpert rifampicin susceptible cases do not get a culture, so isoniazid mono-resistance is not routinely investigated. TB culture and drug susceptibility testing (DST) is only indicated for patients that demonstrate rifampicin resistance on the Xpert, paucibacillary TB cases missed by Xpert (HIV infected, children and extra-pulmonary TB) and patients that fail TB treatment. Despite the recent changes in the diagnosis and management of TB, there are no studies that have assessed their impact on culture confirmed TB. The level of isoniazid mono-resistance that is not routinely investigated |

1  
2  
3  
4  
5  
6  
7  
8  
9  
10  
11  
12  
13  
14  
15  
16  
17  
18  
19  
20  
21  
22  
23  
24  
25  
26  
27  
28  
29  
30  
31  
32  
33  
34  
35  
36  
37  
38  
39  
40  
41  
42  
43  
44  
45  
46

|                |   |                                                                                                                                                                                                                                                                                                                                               |   |                                                                                                                                                                                                                                                                                                                                                                                                                                                                                                                                                 |                                                                                                                                                                                                                                                                                                                                               |
|----------------|---|-----------------------------------------------------------------------------------------------------------------------------------------------------------------------------------------------------------------------------------------------------------------------------------------------------------------------------------------------|---|-------------------------------------------------------------------------------------------------------------------------------------------------------------------------------------------------------------------------------------------------------------------------------------------------------------------------------------------------------------------------------------------------------------------------------------------------------------------------------------------------------------------------------------------------|-----------------------------------------------------------------------------------------------------------------------------------------------------------------------------------------------------------------------------------------------------------------------------------------------------------------------------------------------|
|                |   |                                                                                                                                                                                                                                                                                                                                               |   |                                                                                                                                                                                                                                                                                                                                                                                                                                                                                                                                                 | with current diagnostic methods is unknown, but instead these patients are getting rifampicin monotherapy during the continuous phase of their first line TB therapy which could potentially fuel drug resistance. On the other hand, patients with rifampicin mono-resistance can benefit from the addition of isoniazid in their treatment. |
| Objectives     | 3 | State specific objectives, including any prespecified hypotheses                                                                                                                                                                                                                                                                              | 5 | Evaluate the amount of rifampicin and isoniazid mono-resistance.<br>Describe the drug resistance patterns and distribution among different age groups, genders and districts in KZN, South Africa.                                                                                                                                                                                                                                                                                                                                              |                                                                                                                                                                                                                                                                                                                                               |
| <b>Methods</b> |   |                                                                                                                                                                                                                                                                                                                                               |   |                                                                                                                                                                                                                                                                                                                                                                                                                                                                                                                                                 |                                                                                                                                                                                                                                                                                                                                               |
| Study design   | 4 | Present key elements of study design early in the paper                                                                                                                                                                                                                                                                                       | 5 | The study is a retrospective observational study using laboratory data.                                                                                                                                                                                                                                                                                                                                                                                                                                                                         |                                                                                                                                                                                                                                                                                                                                               |
| Setting        | 5 | Describe the setting, locations, and relevant dates, including periods of recruitment, exposure, follow-up, and data collection                                                                                                                                                                                                               | 5 | This retrospective observational study was conducted at the central academic laboratory of the KwaZulu-Natal province of South Africa using TB culture data for 2011-2014. KZN province is one of nine provinces in South Africa and its population of just over 10 million ranks second in the country. There are 77 public health hospitals (including 8 MDR-TB initiation sites) within 11 health districts. Provincial Mycobacterium tuberculosis culture and drug susceptibility testing are performed in one central academic laboratory. |                                                                                                                                                                                                                                                                                                                                               |
| .Participants  | 6 | (a) <i>Cohort study</i> —Give the eligibility criteria, and the sources and methods of selection of participants. Describe methods of follow-up<br><i>Case-control study</i> —Give the eligibility criteria, and the sources and methods of case ascertainment and control selection. Give the rationale for the choice of cases and controls | 6 | The TB culture and drug susceptibility data was collected from the National Health Laboratory Service laboratory information system (LIS) which contains all electronic laboratory results. TB All                                                                                                                                                                                                                                                                                                                                              |                                                                                                                                                                                                                                                                                                                                               |

|                              |    |                                                                                                                                                                                      |   |                                                                                                                                                                                                                                                                                                                                                                                                                                                                                                                                         |
|------------------------------|----|--------------------------------------------------------------------------------------------------------------------------------------------------------------------------------------|---|-----------------------------------------------------------------------------------------------------------------------------------------------------------------------------------------------------------------------------------------------------------------------------------------------------------------------------------------------------------------------------------------------------------------------------------------------------------------------------------------------------------------------------------------|
|                              |    | <i>Cross-sectional study</i> —Give the eligibility criteria, and the sources and methods of selection of participants                                                                |   | cultures performed in the provincial TB laboratory from 2011 till 2014 were included                                                                                                                                                                                                                                                                                                                                                                                                                                                    |
|                              |    | (b) <i>Cohort study</i> —For matched studies, give matching criteria and number of exposed and unexposed                                                                             |   |                                                                                                                                                                                                                                                                                                                                                                                                                                                                                                                                         |
|                              |    | <i>Case-control study</i> —For matched studies, give matching criteria and the number of controls per case                                                                           |   |                                                                                                                                                                                                                                                                                                                                                                                                                                                                                                                                         |
| Variables                    | 7  | Clearly define all outcomes, exposures, predictors, potential confounders, and effect modifiers. Give diagnostic criteria, if applicable                                             |   | Not applicable                                                                                                                                                                                                                                                                                                                                                                                                                                                                                                                          |
| Data sources/<br>measurement | 8* | For each variable of interest, give sources of data and details of methods of assessment (measurement). Describe comparability of assessment methods if there is more than one group | 6 | The data was collected from the National Health Laboratory Service laboratory information system (LIS) which contains all electronic laboratory results. In the absence of a unique identifier, duplicates were removed using MRN number (number given by the laboratory to specimens from the same patient) and demographic data (name, surname and date of birth). The results were stratified according to the health districts, age and gender. For the analysis of age, cases without recorded age or date of birth were excluded. |
| Bias                         | 9  | Describe any efforts to address potential sources of bias                                                                                                                            |   | Not Applicable                                                                                                                                                                                                                                                                                                                                                                                                                                                                                                                          |
| Study size                   | 10 | Explain how the study size was arrived at                                                                                                                                            |   | Not Applicable: All results included                                                                                                                                                                                                                                                                                                                                                                                                                                                                                                    |

Continued on next page

|    |                        |     |                                                                                                                                                                                                   |          |                                                                                                                                                                                                                                                                                                                                                                                                               |
|----|------------------------|-----|---------------------------------------------------------------------------------------------------------------------------------------------------------------------------------------------------|----------|---------------------------------------------------------------------------------------------------------------------------------------------------------------------------------------------------------------------------------------------------------------------------------------------------------------------------------------------------------------------------------------------------------------|
| 1  |                        |     |                                                                                                                                                                                                   |          |                                                                                                                                                                                                                                                                                                                                                                                                               |
| 2  | Quantitative variables | 11  | Explain how quantitative variables were handled in the analyses. If applicable, describe which groupings were chosen and why                                                                      | 6        | Data was described using frequencies and proportions.                                                                                                                                                                                                                                                                                                                                                         |
| 3  |                        |     |                                                                                                                                                                                                   |          |                                                                                                                                                                                                                                                                                                                                                                                                               |
| 4  | Statistical methods    | 12  | (a) Describe all statistical methods, including those used to control for confounding                                                                                                             | 6        | Continuous data was described using means, standard deviations (sd) and 95% confidence intervals (95% CI). Categorical outcomes were tested using the chi-squared test. Log binomial regression of MDR and XDR-TB was performed using sex, age group, district and year as predictors to estimate the adjusted relative risk ratios. Data was analysed using Stata 14 (StataCorp., College Station, TX, USA). |
| 5  |                        |     |                                                                                                                                                                                                   |          |                                                                                                                                                                                                                                                                                                                                                                                                               |
| 6  |                        |     |                                                                                                                                                                                                   |          |                                                                                                                                                                                                                                                                                                                                                                                                               |
| 7  |                        |     |                                                                                                                                                                                                   |          |                                                                                                                                                                                                                                                                                                                                                                                                               |
| 8  |                        |     |                                                                                                                                                                                                   |          |                                                                                                                                                                                                                                                                                                                                                                                                               |
| 9  |                        |     |                                                                                                                                                                                                   |          |                                                                                                                                                                                                                                                                                                                                                                                                               |
| 10 |                        |     |                                                                                                                                                                                                   |          |                                                                                                                                                                                                                                                                                                                                                                                                               |
| 11 |                        |     |                                                                                                                                                                                                   |          |                                                                                                                                                                                                                                                                                                                                                                                                               |
| 12 |                        |     |                                                                                                                                                                                                   |          |                                                                                                                                                                                                                                                                                                                                                                                                               |
| 13 |                        |     |                                                                                                                                                                                                   |          |                                                                                                                                                                                                                                                                                                                                                                                                               |
| 14 |                        |     |                                                                                                                                                                                                   |          |                                                                                                                                                                                                                                                                                                                                                                                                               |
| 15 |                        |     |                                                                                                                                                                                                   |          |                                                                                                                                                                                                                                                                                                                                                                                                               |
| 16 |                        |     |                                                                                                                                                                                                   |          |                                                                                                                                                                                                                                                                                                                                                                                                               |
| 17 |                        |     |                                                                                                                                                                                                   |          |                                                                                                                                                                                                                                                                                                                                                                                                               |
| 18 |                        |     |                                                                                                                                                                                                   |          |                                                                                                                                                                                                                                                                                                                                                                                                               |
| 19 |                        |     |                                                                                                                                                                                                   |          |                                                                                                                                                                                                                                                                                                                                                                                                               |
| 20 |                        |     | (b) Describe any methods used to examine subgroups and interactions                                                                                                                               |          |                                                                                                                                                                                                                                                                                                                                                                                                               |
| 21 |                        |     | (c) Explain how missing data were addressed                                                                                                                                                       |          |                                                                                                                                                                                                                                                                                                                                                                                                               |
| 22 |                        |     | (d) <i>Cohort study</i> —If applicable, explain how loss to follow-up was addressed                                                                                                               |          |                                                                                                                                                                                                                                                                                                                                                                                                               |
| 23 |                        |     | <i>Case-control study</i> —If applicable, explain how matching of cases and controls was addressed                                                                                                |          |                                                                                                                                                                                                                                                                                                                                                                                                               |
| 24 |                        |     | <i>Cross-sectional study</i> —If applicable, describe analytical methods taking account of sampling strategy                                                                                      |          |                                                                                                                                                                                                                                                                                                                                                                                                               |
| 25 |                        |     | (e) Describe any sensitivity analyses                                                                                                                                                             |          |                                                                                                                                                                                                                                                                                                                                                                                                               |
| 26 |                        |     |                                                                                                                                                                                                   |          |                                                                                                                                                                                                                                                                                                                                                                                                               |
| 27 |                        |     |                                                                                                                                                                                                   |          |                                                                                                                                                                                                                                                                                                                                                                                                               |
| 28 |                        |     |                                                                                                                                                                                                   |          |                                                                                                                                                                                                                                                                                                                                                                                                               |
| 29 | <b>Results</b>         |     |                                                                                                                                                                                                   |          |                                                                                                                                                                                                                                                                                                                                                                                                               |
| 30 | Participants           | 13* | (a) Report numbers of individuals at each stage of study—eg numbers potentially eligible, examined for eligibility, confirmed eligible, included in the study, completing follow-up, and analysed | Figure 1 | A flow diagram is used to report number of specimens and individuals at each stage                                                                                                                                                                                                                                                                                                                            |
| 31 |                        |     |                                                                                                                                                                                                   |          |                                                                                                                                                                                                                                                                                                                                                                                                               |
| 32 |                        |     |                                                                                                                                                                                                   |          |                                                                                                                                                                                                                                                                                                                                                                                                               |
| 33 |                        |     |                                                                                                                                                                                                   |          |                                                                                                                                                                                                                                                                                                                                                                                                               |
| 34 |                        |     | (b) Give reasons for non-participation at each stage                                                                                                                                              |          |                                                                                                                                                                                                                                                                                                                                                                                                               |
| 35 |                        |     | (c) Consider use of a flow diagram                                                                                                                                                                |          |                                                                                                                                                                                                                                                                                                                                                                                                               |
| 36 | Descriptive data       | 14* | (a) Give characteristics of study participants (eg demographic, clinical, social) and information on exposures and potential confounders                                                          | 7        | -Between 2011 and 2014, a total of 951 209 specimens were cultured for MTB in KwaZulu-Natal                                                                                                                                                                                                                                                                                                                   |
| 37 |                        |     |                                                                                                                                                                                                   |          |                                                                                                                                                                                                                                                                                                                                                                                                               |
| 38 |                        |     |                                                                                                                                                                                                   |          |                                                                                                                                                                                                                                                                                                                                                                                                               |
| 39 |                        |     |                                                                                                                                                                                                   |          |                                                                                                                                                                                                                                                                                                                                                                                                               |
| 40 |                        |     |                                                                                                                                                                                                   |          |                                                                                                                                                                                                                                                                                                                                                                                                               |
| 41 |                        |     |                                                                                                                                                                                                   |          |                                                                                                                                                                                                                                                                                                                                                                                                               |
| 42 |                        |     |                                                                                                                                                                                                   |          |                                                                                                                                                                                                                                                                                                                                                                                                               |
| 43 |                        |     |                                                                                                                                                                                                   |          |                                                                                                                                                                                                                                                                                                                                                                                                               |
| 44 |                        |     |                                                                                                                                                                                                   |          |                                                                                                                                                                                                                                                                                                                                                                                                               |
| 45 |                        |     |                                                                                                                                                                                                   |          |                                                                                                                                                                                                                                                                                                                                                                                                               |
| 46 |                        |     |                                                                                                                                                                                                   |          |                                                                                                                                                                                                                                                                                                                                                                                                               |

-After removing duplicates, there were 36644, 30208, 22568, 14672 culture confirmed cases of TB in 2011, 2012, 2013 and 2014 respectively

(b) Indicate number of participants with missing data for each variable of interest

(c) Cohort study—Summarise follow-up time (eg, average and total amount)

Outcome data 15\* Cohort study—Report numbers of outcome events or summary measures over time Not Applicable

Case-control study—Report numbers in each exposure category, or summary measures of exposure

Cross-sectional study—Report numbers of outcome events or summary measures

Main results 16 (a) Give unadjusted estimates and, if applicable, confounder-adjusted estimates and their precision (eg, 95% confidence interval). Make clear which confounders were adjusted for and why they were included 7-8 Standard deviations and 95% confidence intervals are given

(b) Report category boundaries when continuous variables were categorized

(c) If relevant, consider translating estimates of relative risk into absolute risk for a meaningful time period

Continued on next page

|                   |    |                                                                                                                                                                            |       |                                                                                                                                                                                                                                                                                                                                                                                                                                                                                                                                                                                                    |
|-------------------|----|----------------------------------------------------------------------------------------------------------------------------------------------------------------------------|-------|----------------------------------------------------------------------------------------------------------------------------------------------------------------------------------------------------------------------------------------------------------------------------------------------------------------------------------------------------------------------------------------------------------------------------------------------------------------------------------------------------------------------------------------------------------------------------------------------------|
| Other analyses    | 17 | Report other analyses done—eg analyses of subgroups and interactions, and sensitivity analyses                                                                             |       |                                                                                                                                                                                                                                                                                                                                                                                                                                                                                                                                                                                                    |
| <b>Discussion</b> |    |                                                                                                                                                                            |       |                                                                                                                                                                                                                                                                                                                                                                                                                                                                                                                                                                                                    |
| Key results       | 18 | Summarise key results with reference to study objectives                                                                                                                   | 8-12  | <p>Key findings:</p> <ul style="list-style-type: none"> <li>-Increasing mono-resistance highlight the importance of testing for INH resistance in all patients with Xpert rifampicin resistance</li> <li>-Significant INH mono-resistance that is currently missed in the initial diagnosis of TB.</li> <li>- The majority of DR-TB cases were found between the ages of 15 and 44 years, which is the same age group that is known to have the highest HIV prevalence</li> <li>-DR TB is high in areas bordering high DR TB regions, thus migration may influence resistance patterns.</li> </ul> |
| Limitations       | 19 | Discuss limitations of the study, taking into account sources of potential bias or imprecision. Discuss both direction and magnitude of any potential bias                 | 13    | <ul style="list-style-type: none"> <li>-Retrospective design; the accuracy of the data is dependent on available information.</li> <li>- Absence of unique patient identifiers: affects the accuracy of the data as the removal of duplicates is imperfect</li> <li>- Could not differentiate between new and known MDR-TB patients</li> <li>- Xpert MTB/RIF data was not available for comparison</li> </ul>                                                                                                                                                                                      |
| Interpretation    | 20 | Give a cautious overall interpretation of results considering objectives, limitations, multiplicity of analyses, results from similar studies, and other relevant evidence | 12-13 | Our findings highlight the importance of DR-TB diagnostic                                                                                                                                                                                                                                                                                                                                                                                                                                                                                                                                          |



1  
2  
3  
4  
5  
6  
7  
8  
9  
10  
11  
12  
13  
14  
15  
16  
17  
18  
19  
20  
21  
22  
23  
24  
25  
26  
27  
28  
29  
30  
31  
32  
33  
34  
35  
36  
37  
38  
39  
40  
41  
42  
43  
44  
45  
46

algorithms that include both rifampicin and isoniazid DST in the initial testing. Early detection of RMR will allow addition of isoniazid in the treatment regimen, while detection of IMR will prevent rifampicin monotherapy later on during the continuation phase of treatment which has been associated with development of rifampicin resistance. This will also allow us to have a clearer estimate of MDR-TB cases. HIV and migration play a significant role in the distribution of DR-TB in this region, therefore TB control measures that address these factors may have impact on DR-TB level.

|                          |    |                                                                                                                                                               |    |                                                  |
|--------------------------|----|---------------------------------------------------------------------------------------------------------------------------------------------------------------|----|--------------------------------------------------|
| Generalisability         | 21 | Discuss the generalisability (external validity) of the study results                                                                                         | 13 | Conclusion applies to a wide variety of settings |
| <b>Other information</b> |    |                                                                                                                                                               |    |                                                  |
| Funding                  | 22 | Give the source of funding and the role of the funders for the present study and, if applicable, for the original study on which the present article is based |    | None                                             |

\*Give information separately for cases and controls in case-control studies and, if applicable, for exposed and unexposed groups in cohort and cross-sectional studies.

**Note:** An Explanation and Elaboration article discusses each checklist item and gives methodological background and published examples of transparent reporting. The STROBE checklist is best used in conjunction with this article (freely available on the Web sites of PLoS Medicine at <http://www.plosmedicine.org/>, Annals of Internal Medicine at <http://www.annals.org/>, and Epidemiology at <http://www.epidem.com/>). Information on the STROBE Initiative is available at [www.strobe-statement.org](http://www.strobe-statement.org).

# BMJ Open

## Evolving rifampicin and isoniazid mono-resistance in a high multidrug-resistant and extensively drug-resistant tuberculosis region: a retrospective data analysis

|                                 |                                                                                                                                                                                                                                                                                                                                                                                                                                        |
|---------------------------------|----------------------------------------------------------------------------------------------------------------------------------------------------------------------------------------------------------------------------------------------------------------------------------------------------------------------------------------------------------------------------------------------------------------------------------------|
| Journal:                        | <i>BMJ Open</i>                                                                                                                                                                                                                                                                                                                                                                                                                        |
| Manuscript ID                   | bmjopen-2019-031663.R2                                                                                                                                                                                                                                                                                                                                                                                                                 |
| Article Type:                   | Original research                                                                                                                                                                                                                                                                                                                                                                                                                      |
| Date Submitted by the Author:   | 08-Oct-2019                                                                                                                                                                                                                                                                                                                                                                                                                            |
| Complete List of Authors:       | Mvelase, Nomonde; National Health Laboratory Service, Medical Microbiology<br>Balakrishna, Yusentha; South African Medical Research Council, Biostatistics Unit<br>Lutchminarain, Keeren; National Health Laboratory Service, Medical Microbiology ; University of KwaZulu-Natal, Medical Microbiology<br>Mlisana, Koleka; National Health Laboratory Service, Medical Microbiology; University of KwaZulu-Natal, Medical Microbiology |
| <b>Primary Subject Heading</b>: | Infectious diseases                                                                                                                                                                                                                                                                                                                                                                                                                    |
| Secondary Subject Heading:      | Diagnostics, Epidemiology, Public health, Infectious diseases, Health policy                                                                                                                                                                                                                                                                                                                                                           |
| Keywords:                       | Tuberculosis < INFECTIOUS DISEASES, Public health < INFECTIOUS DISEASES, Health policy < HEALTH SERVICES ADMINISTRATION & MANAGEMENT, Diagnostic microbiology < INFECTIOUS DISEASES, Epidemiology < INFECTIOUS DISEASES                                                                                                                                                                                                                |
|                                 |                                                                                                                                                                                                                                                                                                                                                                                                                                        |

SCHOLARONE™  
Manuscripts

1  
2  
3 **Evolving rifampicin and isoniazid mono-resistance in a high multidrug-resistant and**  
4 **extensively drug-resistant tuberculosis region: a retrospective data analysis**  
5  
6  
7

8 N. R. Mvelase <sup>1,2</sup>, Y. Balakrishna <sup>3</sup>, K. Lutchminarain <sup>1,2</sup>, K. Mlisana <sup>1,2,4</sup>  
9

10  
11 <sup>1</sup>Department of Medical Microbiology, KwaZulu-Natal Academic Complex, National Health  
12 Laboratory Service, Durban, South Africa  
13  
14

15  
16  
17 <sup>2</sup>Department of Medical Microbiology, School of Laboratory Medicine & Medical Sciences,  
18 University of KwaZulu-Natal, Durban, South Africa  
19  
20

21  
22 <sup>3</sup>Biostatistics Unit, South African Medical Research Council, Durban, South Africa  
23  
24

25  
26 <sup>4</sup>Centre for the AIDS Programme of Research in South Africa (CAPRISA), University of  
27 KwaZulu-Natal, Durban, South Africa  
28  
29

30  
31  
32  
33  
34 Corresponding author: Nomonde R. Mvelase  
35

36  
37 Address: KwaZulu-Natal National Health Laboratory Service, Department of Medical  
38 Microbiology, Level 4, Laboratory Building, IALCH, Durban, South Africa  
39  
40

41  
42 Email: [dlaminin15@ukzn.ac.za](mailto:dlaminin15@ukzn.ac.za)  
43  
44

45  
46 Running Title: Drug resistant TB in KwaZulu-Natal  
47  
48  
49  
50  
51  
52  
53  
54  
55  
56  
57  
58  
59  
60

## Abstract

**Objectives:** South Africa ranks among the highest drug resistant tuberculosis burdened countries in the world. This study assessed the changes in resistance levels in culture confirmed *Mycobacterium tuberculosis* (MTB) in the highest burdened province of South Africa during a period where major changes in diagnostic algorithm were implemented.

**Setting:** This study was conducted at the central academic laboratory of the KwaZulu-Natal province of South Africa.

**Participants:** We analysed data for all MTB cultures performed in the KwaZulu-Natal province between 2011 and 2014. The data were collected from the laboratory information system.

**Results:** Out of 88 559 drug susceptibility results analysed, 18352 (20.7%) were resistant to rifampicin and 19190 (21.7%) showed resistance to isoniazid. The proportion of rifampicin resistant cases that were mono-resistant increased from 15.3% in 2011 to 21.4% in 2014 while INH mono-resistance showed a range between 13.8% and 21.1%. The MDR-TB rates increased from 18.8% to 23.9% and the proportion of MDR-TB cases that had XDR-TB remained between 10.2% and 11.1%. Most drug resistance was found in females between the ages of 15 to 44 years and the northern districts bordering high MDR-TB regions had the highest MDR-TB rates.

**Conclusion:** Our findings show increasing rifampicin mono-resistance and a substantial amount of INH mono-resistance. This highlights a need for an initial test that detects resistance to both these drugs so as to avoid using rifampicin monotherapy during continuous phase of treatment in patients with INH mono-resistance. Furthermore, addition of isoniazid will benefit patients with rifampicin mono-resistance. Although DR-TB is widespread, HIV

1  
2  
3 24 and migration influence its distribution; therefore, TB control strategies should include  
4  
5 25 interventions that target these aspects.  
6  
7  
8  
9 26

#### Strengths and limitations of this study

- The study was performed in the country with one of the highest TB incidence rate and a largest HIV epidemic in the world.
- The analysed data involves a period of major shift in TB diagnostic algorithm.
- The patient level Xpert MTB/RIF data was not available in order to compare with the TB culture results.
- The absence of unique patient identifiers also affects the accuracy of the data as the removal of duplicates was imperfect.

#### Background

27  
28  
29 The World Health Organisation (WHO) has declared multidrug resistant tuberculosis a global  
30 crisis. Multidrug-resistant tuberculosis (MDR TB) is defined as resistance to isoniazid and  
31 rifampicin. Despite the decline in the global incidence rates of tuberculosis (TB), drug resistant  
32 TB cases are on the rise with 558 000 estimated incident cases of MDR plus rifampicin resistant  
33 (RR) TB and more than 230 000 deaths in 2017 [1]. South Africa has one of the highest  
34 incidence of TB in the world which WHO estimated to be 567 per 100 000 in 2017 [1]. In 2017  
35 alone, South Africa had an estimated number of 14 000 rifampicin resistant cases, the second  
36 highest number in Africa after Nigeria which has more than three times the South African  
37 population [1]. Moreover, the first reported outbreak of extensively drug-resistant (XDR)  
38 tuberculosis (defined as MDR-TB plus resistance to any second line injectable and a  
39  
40  
41  
42  
43  
44  
45  
46  
47  
48  
49  
50  
51  
52  
53  
54  
55  
56  
57  
58  
59  
60

1  
2  
3 39 fluoroquinolone) which caused global concern in 2005 was from the province of KwaZulu-  
4  
5 40 Natal (KZN) in South Africa [2]. While the incidence of TB in KZN is proportional to other  
6  
7 41 provinces in the country, it remains the highest drug resistant (DR) TB burdened province with  
8  
9 42 almost a third of the country's cases of drug resistant TB [3].  
10  
11  
12  
13 43

14 44 Compounding the problem of TB in South Africa, is the high rate of co-infection with Human  
15  
16 45 Immunodeficiency Virus (HIV) (about 60%) [1]. While it is well known that HIV is associated  
17  
18 46 with smear negative TB, smear microscopy was traditionally used in the initial diagnosis of TB  
19  
20 47 because of its quick time to results and low cost [4]. On the other hand, conventional TB culture  
21  
22 48 is much more sensitive than smear microscopy, but its high cost, complexity and long delays  
23  
24 49 in getting the results made it impractical for routine diagnosis of TB. Therefore, when the WHO  
25  
26 50 endorsed the Xpert MTB/RIF (Cepheid GeneXpert, Sunnyvale, Ca, USA) in 2010, it was  
27  
28 51 subsequently introduced in South Africa in 2011. The Xpert MTB/RIF (Xpert) is an automated  
29  
30 52 nucleic acid amplification test that offers better detection of TB compared to smear microscopy  
31  
32 53 with an added advantage of the ability to detect rifampicin resistance in less than two hours in  
33  
34 54 clinical specimens [5-6].  
35  
36  
37  
38  
39  
40  
41

42 56 The implementation of Xpert in South Africa completely changed the testing algorithm for the  
43  
44 57 diagnosis of TB [7]. Xpert replaced smear microscopy in the initial diagnosis of TB and all  
45  
46 58 patients that do not demonstrate rifampicin resistance are assumed to have drug susceptible TB  
47  
48 59 and therefore initiated on standard first line TB therapy. Thus, Xpert rifampicin susceptible  
49  
50 60 cases do not get a culture, so isoniazid mono-resistance is not routinely investigated. TB culture  
51  
52 61 and drug susceptibility testing (DST) is only indicated for patients that demonstrate rifampicin  
53  
54 62 resistance on the Xpert, paucibacillary TB cases missed by Xpert (HIV infected, children and  
55  
56 63 extra-pulmonary TB) and patients that fail TB treatment.  
57  
58  
59  
60

1  
2  
3 64  
4  
5  
6 65 Despite the recent changes in the diagnosis and management of TB, there are no studies that  
7  
8 66 have assessed their impact on culture confirmed TB. The level of isoniazid mono-resistance  
9  
10 67 that is not routinely investigated with current diagnostic methods is unknown, but instead these  
11  
12 68 patients are getting rifampicin monotherapy during the continuous phase of their first line TB  
13  
14 69 therapy which could potentially fuel drug resistance. On the other hand, patients with  
15  
16  
17 70 rifampicin mono-resistance can benefit from the addition of isoniazid in their treatment. We  
18  
19 71 therefore undertook this study to evaluate the amount of rifampicin and isoniazid mono-  
20  
21 72 resistance, so as to ensure optimal and appropriate diagnostic algorithms. We also describe the  
22  
23 73 drug resistance patterns and distribution among different age groups, genders and districts in  
24  
25  
26 74 KZN, South Africa. Understanding the patterns and distributions of drug resistant TB will  
27  
28 75 inform targeted intervention in TB control in this high TB endemic region.  
29  
30  
31  
32 76

## 33 34 35 77 **Methods**

### 36 37 38 78 **Study design**

39  
40  
41 79 The study is a retrospective observational study using laboratory data for 2011 till 2014.  
42  
43  
44 80

### 45 46 81 **Study setting**

47  
48 82 The KZN province is one of nine provinces in South Africa and its population of just over 10  
49  
50 83 million ranks second in the country. There are 77 public health hospitals (including 8 MDR-  
51  
52 84 TB initiation sites) within 11 health districts. Provincial *Mycobacterium tuberculosis* culture  
53  
54 85 and drug susceptibility testing are performed in one central academic laboratory.  
55  
56  
57 86

### 58 59 87 **Laboratory Procedures** 60

1  
2  
3 88 MTB isolation from clinical samples was routinely done using the automated BACTEC  
4  
5 89 mycobacteria growth indication tubes (MGIT) 960 system (BACTEC MGIT Becton  
6  
7 90 Dickinson, USA). Indirect line probe assay (LPA) [GenoType MTBDRplus assay, Hain  
8  
9 91 Lifescience, Nehren, Germany] was performed on all positive MGIT cultures using standard  
10  
11 92 methods. Thereafter, additional DST for isoniazid (INH), rifampicin (RIF), ofloxacin,  
12  
13 93 streptomycin, kanamycin was performed for all TB culture positive cases using 1% agar  
14  
15 94 proportion method (APM) on Middlebrook 7H10.  
16  
17  
18  
19  
20  
21  
22

### 23 96 **Patient and public involvement**

24 97 The data used for this study was the routine TB diagnostic data, therefore there was no direct  
25  
26 98 patient and public involvement.  
27  
28  
29  
30

### 31 100 **Data collection and analysis**

32  
33 101 The TB culture and DST data was collected from the National Health Laboratory Service  
34  
35 102 laboratory information system (LIS) which contains all electronic laboratory results. In the  
36  
37 103 absence of a unique identifier, duplicates were removed using MRN number (number given by  
38  
39 104 the laboratory to specimens from the same patient) and demographic data (name, surname and  
40  
41 105 date of birth). The results were stratified according to the health districts, age and gender. For  
42  
43 106 the analysis of age, cases without recorded age or date of birth were excluded.  
44  
45  
46  
47  
48

49 108 Data was described using frequencies and proportions. Continuous data was described using  
50  
51 109 means, standard deviations (sd) and 95% confidence intervals (95% CI). Categorical outcomes  
52  
53 110 were tested using the chi-squared test. Log binomial regression of MDR and XDR-TB was  
54  
55 111 performed using sex, age group, district and year as predictors to estimate the adjusted relative  
56  
57 112 risk ratios. Data was analysed using Stata 14 (StataCorp., College Station, TX, USA).  
58  
59  
60



113

**114 Ethical consideration**

115 The data used for the study is routine data for management of TB patients; therefore, no  
116 individual patient consent was required. The ethical approval to perform the retrospective  
117 analysis was obtained from the Biomedical Research Ethics Committee of the University of  
118 KwaZulu-Natal (REF: BE085/12).

119

120

**Results**

121 Between 2011 and 2014, a total of 951 209 specimens were cultured for MTB in KwaZulu-  
122 Natal (Figure 1). The total number of specimens for which culture was requested, decreased  
123 annually with the average percentage difference (decline) of -14.2% [(95% CI -42.3% to  
124 13.9%) and (sd 11.3%)] per year. Similarly, the MTB positivity rate decreased by 6.0% (from  
125 15.6% to 9.6%) (Figure 2). After removing duplicates, there were 36644, 30208, 22568, 14672  
126 culture confirmed cases of TB in 2011, 2012, 2013 and 2014 respectively. The average  
127 percentage decline in total positive TB cases was 27.1% [(95% CI 3.5% to 50.7%) and (sd  
128 9.5%)] per year.

129 About 85% (88559) cases of culture positive TB had an LPA done to test for drug susceptibility  
130 against RIF and INH (Table 1). Of these, 19190 (21.7%) were resistant to INH and 18352  
131 (20.7%) were resistant to RIF. There were 953 RIF mono-resistant (RMR) cases in 2011, 767  
132 in 2012, 676 in 2013 and 667 in 2014. RMR refers to the proportion rifampicin resistant cases  
133 that are susceptible to INH. The RMR increased from 15.3% in 2011 to 21.4% in 2014. Over  
134 the same four-year period, there were 3396 (17.7%) INH mono-resistance (IMR) cases. IMR  
135 refers to the proportion INH resistant cases that are susceptible to rifampicin.

136 A steady decline of both MDR-TB and XDR-TB cases was noted, with an overall decline of  
137 49.2% (from 6901 in 2011 to 3506 in 2014) and 44.9% (from 706 in 2011 to 389 in 2014)

1  
2  
3 138 respectively (Table 2). The proportion of TB cases that had MDR-TB ranged from 18.8% in  
4  
5 139 2011 to 23.9% in 2014, with an overall average of 21%. The overall rate of XDR-TB among  
6  
7 140 MDR-TB cases was 11% (2336 XDR-TB cases out of 21221 MDR-TB).  
8  
9

10  
11 141 The majority of the TB cases were males; however, females constituted highest prevalence of  
12  
13 142 the DR-TB across all age groups (Figure 3 and 4). The number of MDR-TB cases was higher  
14  
15 143 among females than males until the age of 34, thereafter males had a higher number than  
16  
17 144 females. Similarly, for XDR-TB, females constituted the most number of XDR-TB. More than  
18  
19 145 60% of both MDR-TB and XDR-TB cases were patients between the ages of 25 and 44 years.  
20  
21 146 It was observed that children less than 5 years of age showed the lowest rates of MDR-TB  
22  
23 147 whilst that of XDR-TB was lowest between the ages of 6-14 years.  
24  
25  
26

27  
28 148 Over the 4-year period, eThekweni district had the highest number of TB cases with 47.5% of  
29  
30 149 all cases in KZN coming from this district (Table 2). However, the districts with the highest  
31  
32 150 yearly proportion of MDR-TB cases each year were Umkhanyakude [(mean 33.2%, sd 2.3%),  
33  
34 151 (95% CI 29.5% to 36.9%)] followed by Zululand [(mean 28.1%, sd 2.3), (95% CI 24.4% to  
35  
36 152 31.8%)] and Harry Gwala [(mean 26.2%, sd 9.4), (95% CI 11.2% to 41.2%)]. The yearly  
37  
38 153 proportion of MDR-TB cases that had XDR-TB were highest at Umzinyathi [(mean 36.4%, sd  
39  
40 154 5.8%), (95% CI 27.2% to 45.6%)] followed by eThekweni [(mean 13.7%, sd 1.1%), (95% CI  
41  
42 155 11.9% to 15.5%)] and Uthukela [(mean 13.2%, sd 5.7%), (95% CI 4.1% to 22.3%)] districts.  
43  
44 156 Umkhanyakude district had the lowest proportion of XDR-TB with a yearly mean of 3.4% [(sd  
45  
46 157 2.4%), (95% CI -0.4% to 7.2%)] over the study period (Figure 5).  
47  
48  
49  
50

51  
52 158

53  
54  
55 159

## Discussion

1  
2  
3 160 In this study we observe a decline in the number of samples processed for MTB culture and  
4  
5 161 culture positivity rate which coincided, with the roll out of the Xpert. This is in keeping with  
6  
7 162 the Xpert roll out which started in March 2011 and was completed in September 2013 when  
8  
9 163 all health facilities in the provinces were using the Xpert for TB diagnosis. According to the  
10  
11 164 South African guidelines, MTB culture is not recommended for Xpert rifampicin susceptible  
12  
13 165 patients, which constitutes the majority of patients infected with TB, hence the decline in the  
14  
15 166 number of MTB cultures from 277 963 in 2011 to 172 671 in 2014. Nevertheless, the sheer  
16  
17 167 volumes of MTB cultures are still enormous which reflects the overwhelming burden of DR  
18  
19 168 TB in this region. Prior to Xpert introduction, drug susceptibility testing for MTB was only  
20  
21 169 performed on patients that were considered to be at risk of DR TB, but the use of Xpert for  
22  
23 170 initial diagnosis of TB enables screening for rifampicin resistance in all patients. The revised  
24  
25 171 indications for culture selects for cases that are more likely to have drug resistant (Xpert  
26  
27 172 rifampicin resistant TB) and paucibacillary TB (extra-pulmonary TB and HIV positive Xpert  
28  
29 173 negative), which explains the high rates of DR TB and declining culture positivity rate observed  
30  
31 174 in this study.  
32  
33  
34  
35  
36  
37  
38  
39

40 176 Rifampicin is always used in combination with other drugs in the treatment of TB in SA. In  
41  
42 177 addition, spontaneously occurring mutations are rare compared to other TB drugs [8].  
43  
44 178 Consequently, the development of RMR is expected to be uncommon. The finding of  
45  
46 179 increasing mono-resistance in this context is therefore concerning. In a previous study done by  
47  
48 180 Coovadia *et al*, at the same laboratory, RMR was 8.8% during the years 2007-2009 [9].  
49  
50 181 Similarly, Mukinda *et al* reported increasing RMR in the Western Cape province of SA [10].  
51  
52 182 These findings highlight the importance of testing for INH resistance in all patients with Xpert  
53  
54 183 rifampicin resistance. This positively impacts patient management further as patients with  
55  
56  
57  
58  
59  
60

1  
2  
3 184 confirmed rifampicin mono-resistance could benefit by using isoniazid in their treatment  
4  
5 185 regimen.  
6  
7

8 186

9  
10 187 The development of rifampicin resistance has serious effects on the treatment of TB. Patients  
11  
12 188 have to be treated with more expensive and more toxic drugs for a longer duration. Studies  
13  
14 189 have been conducted in order to elucidate the causes of RMR with the majority reporting an  
15  
16 190 association between HIV and RMR [11-12]. Factors contributing to this association include  
17  
18 191 decreased drug bioavailability, and drug- drug interactions which lead to decreased rifampicin  
19  
20 192 serum levels [13]. Furthermore, advanced immunosuppression increases susceptibility to  
21  
22 193 infection and permits proliferation of TB which favours transmission [14]. Given the high rate  
23  
24 194 of TB/HIV co-infection in our setting, it is possible that HIV may be contributing to the  
25  
26 195 increasing rate of RMR. Whether using a higher dose of rifampicin proves to be beneficial in  
27  
28 196 co-infected patients remains under investigation.  
29  
30  
31  
32

33 197

34  
35 198 Rifampicin and INH are core drugs that form the backbone for first line short course therapy  
36  
37 199 for the treatment of drug susceptible TB. Given the high burden of disease in this region  
38  
39 200 coupled with the use of Xpert as a screening tool for DR-TB, mono-resistance to INH may  
40  
41 201 inevitably be overlooked. According to the national TB algorithm, a diagnosis of IMR TB is  
42  
43 202 only made using TB culture and DST following a negative Xpert result or treatment failure.  
44  
45 203 The use of standard first line TB therapy in patients with undetected INH resistance equates to  
46  
47 204 using rifampicin monotherapy during the continuation phase. This may subsequently lead to  
48  
49 205 the development of MDR-TB. This was described in a study done by Jacobson *et al* where  
50  
51 206 treatment of patients with IMR using standard first line therapy was associated with poor  
52  
53 207 outcomes and progression to MDR-TB [15]. Several studies have reported previous TB therapy  
54  
55  
56  
57  
58  
59  
60

1  
2  
3 208 as a risk factor for IMR [16-17]. Identifying risk factors for IMR could help to select patients  
4  
5 209 who may require TB culture and DST in order to exclude INH resistance.  
6  
7

8 210

9  
10 211 There was an overall decline in the numbers of MDR (from 6901 in 2011 to 3506 in 2014) and  
11  
12 212 XDR-TB (from 706 in 2011 to 389 in 2014) cases identified using culture. This was in contrast  
13  
14 213 to the increasing number of MDR/RR-TB cases following the introduction of the Xpert in  
15  
16 214 South Africa during this time [18-20]. Perhaps a plausible explanation is that, contrary to the  
17  
18 215 national guidelines, a significant number of patients with Xpert rifampicin resistant TB did not  
19  
20 216 get a subsequent MTB culture for confirmation. This was supported by the 2016 WHO TB  
21  
22 217 report, which reported the percentage of MDR-TB among MDR/RR-TB as 62% in South  
23  
24 218 Africa. This suggests that a substantial number of Xpert rifampicin resistant TB cases are not  
25  
26 219 confirmed by culture because this discrepancy cannot be explained by RMR cases [1]. Another  
27  
28 220 possible reason may be due to patients that are lost to follow up. In KZN province, the specimen  
29  
30 221 for TB culture is only collected when the patient comes back for Xpert results. Consequently,  
31  
32 222 if patients did not return for the results, then specimens for TB culture would not have been  
33  
34 223 collected. According to the WHO, only 41% of notified MDR/RR-TB cases from South Africa  
35  
36 224 were enrolled for MDR-TB treatment in 2013[18]. Although this figure improved to 62% in  
37  
38 225 2014 [20], the gap remains substantial especially given the considerable improvement in  
39  
40 226 rapidity of diagnosing DR-TB with Xpert. Therefore, this decline in culture confirmed DR-  
41  
42 227 TB indicates a change in the testing method used to diagnose tuberculosis rather than a  
43  
44 228 successful TB control program, which led to underestimation of MDR-TB and XDR-TB cases  
45  
46 229 in this study. The proportion of MDR-TB cases that have XDR-TB remained constant at about  
47  
48 230 11% which is comparable to the global trends at that time [18-20].  
49  
50  
51  
52  
53  
54  
55  
56 231  
57  
58  
59  
60

1  
2  
3 232 Our study found higher rates of DR-TB in women compared to men which supports findings  
4  
5 233 from other studies showing higher proportions of DR-TB in women [21-22]. Even though  
6  
7 234 reasons behind the higher DR-TB predisposition among women are unknown, HIV could be a  
8  
9 235 contributing factor. The majority of DR-TB cases were found between the ages of 15 and 44  
10  
11 236 years, which is the same age group that is known to have the highest HIV prevalence [2]. It is  
12  
13 237 well recognised that HIV is a major risk factor for development of TB and HAART reduces its  
14  
15 238 incidence [23-25]. Indeed, Nanoo *et al* showed an inverse relationship between antiretroviral  
16  
17 239 therapy coverage and the incidence of microbiologically confirmed TB in South Africa, with  
18  
19 240 the greatest decline demonstrated in the 25-44 year age group [26].  
20  
21  
22  
23  
24  
25

26 242 The diagnosis of DR-TB in children is generally difficult due to their inability to expectorate  
27  
28 243 and the paucibacillary nature of childhood TB. Consequently, DR data is limited, but since TB  
29  
30 244 in children is largely as a result of primary transmission from adults, the proportion of DR-TB  
31  
32 245 is reported to be similar to that of adults [27-28]. Herein, we observed lower rates of DR-TB  
33  
34 246 particularly MDR-TB in children less than five years compared to adults which could be a  
35  
36 247 reflection of the under diagnosis of DR-TB in this age group. Although these rates are lower in  
37  
38 248 children, they are still unacceptable as they reflect transmission of untreated adult TB.  
39  
40  
41  
42  
43  
44

45 250 Similar to the overall burden of TB in South Africa, DR-TB is also concentrated in urban areas  
46  
47 251 of KZN with eThekweni district harbouring most of the cases due to high population density.  
48  
49 252 However, the rate of MDR-TB cases was highest among the northern districts of the province  
50  
51 253 of Umkhanyakude and Zululand. These are rural districts which share borders with  
52  
53 254 Mpumalanga province, Swaziland and Mozambique, thus migration may influence resistance  
54  
55 255 patterns. Mpumalanga province is known to have the highest DR-TB rate in the country while  
56  
57 256 Swaziland has the highest MDR-TB prevalence in Africa [29-30]. In 2007, Wallengren *et al*  
58  
59  
60

1  
2  
3 257 reported Umzinyathi and Umkhanyakude as the districts with the highest MDR-TB rates [31].  
4  
5 258 The intervention given to the Umzinyathi district following the outbreak of XDR-TB in 2005  
6  
7 259 (Intensive case finding, early diagnosis and initiation treatment for TB, early diagnosis and  
8  
9 260 treatment of HIV, TB infection control and intergration of TB and HIV care) may be  
10  
11 261 responsible for these decreasing rates [32]. Despite declining XDR-TB rates at the Umzinyathi  
12  
13 262 district (where the XDR-TB outbreak was identified in 2005), it still remains the district with  
14  
15 263 the highest XDR-TB rates at about three times higher than the rest of KZN [33].  
16  
17  
18  
19  
20  
21

### 22 265 **Limitations**

23  
24 266 Our study is limited by the retrospective design; the accuracy of the data is dependent on  
25  
26 267 available information on the LIS. The absence of unique patient identifiers also affects the  
27  
28 268 accuracy of the data as the removal of duplicates is imperfect. Although duplicates were  
29  
30 269 removed, we could not differentiate between new and known MDR-TB patients. The patient  
31  
32 270 level Xpert data was not available in order to match with the TB culture results. Nevertheless,  
33  
34 271 the high burden of DR-TB and the fact that all cultures are performed in one laboratory for the  
35  
36 272 whole province provide an important insight to the distribution of TB in this region and may  
37  
38 273 inform targeted intervention.  
39  
40  
41  
42  
43

44 275 Although the data used for this study is relatively old, it represents a critical time of drastic  
45  
46 276 changes in the diagnosis of DR-TB. There have been no subsequent changes in the TB  
47  
48 277 diagnostic algorithm, therefore the findings highlighted in this study should still be relevant to  
49  
50 278 the current setting. The data presented is not prevalence data as only data from MTB positive  
51  
52 279 cultures was used. Thus, the results may be an underrepresentation as patients that were lost to  
53  
54 280 follow up and patients with contaminated/loss of viability cultures were excluded.  
55  
56  
57  
58  
59  
60



1  
2  
3 282 **Conclusions**

4  
5 283 Our findings highlight the importance of DR-TB diagnostic algorithms that include both  
6  
7 284 rifampicin and isoniazid DST in the initial testing. Early detection of RMR will allow addition  
8  
9 285 of isoniazid in the treatment regimen, while detection of IMR will prevent rifampicin  
10  
11 286 monotherapy later on during the continuation phase of treatment which has been associated  
12  
13 287 with development of rifampicin resistance. This will also allow us to have a clearer estimate of  
14  
15 288 MDR-TB cases. HIV and migration play a significant role in the distribution of DR-TB in this  
16  
17 289 region, therefore TB control measures that address these factors may have impact on DR-TB  
18  
19 290 level.  
20  
21  
22  
23  
24  
25 291

26  
27  
28 292 **Acknowledgments**

29  
30  
31 293 We thank the staff at the Inkosi Albert Luthuli Central Hospital TB laboratory for their  
32  
33 294 dedication and hard work. We also thank Thandi Kapwata from the Environment and Health  
34  
35 295 Research Unit within the South African Medical Research Council, for designing the provincial  
36  
37 296 maps.  
38  
39  
40  
41 297

42  
43  
44 298 **Author contributions**

45  
46  
47 299 NRM contributed in the development of the concept, study design, data analysis and writing  
48  
49 300 of the manuscript. YB performed data analysis and assisted with the writing of the manuscript.  
50  
51 301 KL contributed in the interpretation of data and writing of the manuscript. KM supervised the  
52  
53 302 development of the study concept, study design, data analysis and manuscript writing.  
54  
55  
56  
57 303



1  
2  
3 304 **Data sharing statement:** Data may be obtained from a third party and are not publicly  
4  
5 305 available. The data for this study will only be available upon reasonable request and provided  
6  
7 306 approval is obtained from the it's custodians, i.e. the Department of Health and the National  
8  
9 307 Health Laboratory Service.

10  
11  
12  
13 308 **Competing interests:** None

14  
15  
16 309 **Funding:** None

17  
18  
19 310

20  
21  
22 311 **References**

- 23  
24 312
- 25 313 1. World Health Organization. Global Tuberculosis Report 2018.  
26  
27 314 [https://www.who.int/tb/publications/global\\_report/gtbr2018\\_main\\_text\\_28Feb2019.p](https://www.who.int/tb/publications/global_report/gtbr2018_main_text_28Feb2019.pdf?ua=1)  
28  
29 315 [df?ua=1](https://www.who.int/tb/publications/global_report/gtbr2018_main_text_28Feb2019.pdf?ua=1)  
30  
31 316
  - 32 317 2. Gandhi NR, *et al.* Extensively drug-resistant tuberculosis as a cause of death in patients  
33  
34 318 co-infected with tuberculosis and HIV in a rural area of South Africa. *The Lancet* 2006;  
35  
36 319 368: 1575-1580.  
37  
38 320
  - 39 321 3. Ndjeka N. National Department of Health. Multi-drug resistant tuberculosis: strategic  
40  
41 322 overview on MDR-TB care in South Africa. 2014. [https://www.health-e.org.za/wp-](https://www.health-e.org.za/wp-content/uploads/2014/03/Strategic_overview_of_MDR_TB_RSA.pdf)  
42  
43 323 [content/uploads/2014/03/Strategic\\_overview\\_of\\_MDR\\_TB\\_RSA.pdf](https://www.health-e.org.za/wp-content/uploads/2014/03/Strategic_overview_of_MDR_TB_RSA.pdf).  
44  
45 324
- 46  
47  
48  
49  
50  
51  
52  
53  
54  
55 325

- 1  
2  
3 326 4. Hassim S, *et al.* Detection of a substantial rate of multidrug-resistant tuberculosis in an  
4  
5 327 HIV-infected population in South Africa by active monitoring of sputum samples.  
6  
7 328 *Clinical Infectious Disease* 2010; 50: 1053-1059.  
8  
9  
10 329  
11  
12 330 5. Helb D, *et al.* Rapid detection of *Mycobacterium tuberculosis* and rifampin resistance  
13  
14 331 by use of on-demand, near-patient technology. *Journal of Clinical Microbiology* 2010;  
15  
16 332 48: 229-237.  
17  
18  
19 333  
20  
21 334 6. Boehme CC, *et al.* Rapid molecular detection of tuberculosis and rifampin resistance.  
22  
23 335 *New England Journal of Medicine* 2010; 363: 1005-1015.  
24  
25  
26 336  
27  
28 337 7. National Department of Health, South Africa. National tuberculosis management  
29  
30 338 guidelines. 2014.  
31  
32  
33 339 [https://www.health-e.org.za/wp-content/uploads/2014/06/NTCP\\_Adult\\_TB-](https://www.health-e.org.za/wp-content/uploads/2014/06/NTCP_Adult_TB-Guidelines-27.5.2014.pdf)  
34  
35 340 [Guidelines-27.5.2014.pdf](https://www.health-e.org.za/wp-content/uploads/2014/06/NTCP_Adult_TB-Guidelines-27.5.2014.pdf)  
36  
37  
38  
39 341  
40  
41  
42 342 8. McGrath M, *et al.* Mutation rate and the emergence of drug resistance in  
43  
44 343 *Mycobacterium tuberculosis*. *Journal of Antimicrobial Chemotherapy* 2014; 69: 292–  
45  
46 344 302  
47  
48  
49 345  
50  
51 346 9. Coovadia YM, *et al.* Rifampicin mono-resistance in *Mycobacterium tuberculosis* in  
52  
53 347 KwaZulu-Natal, South Africa: a significant phenomenon in a high prevalence TB-HIV  
54  
55 348 region. *PLOS ONE*. 2013, 8: e77712.  
56  
57  
58 349  
59  
60

- 1  
2  
3 350 10. Mukinda FK, *et al.* Rise in rifampicin-mono-resistant tuberculosis in Western Cape,  
4  
5 351 South Africa. *International Journal of Tuberculosis and Lung Disease* 2012; 16: 196–  
6  
7 202.  
8 352  
9  
10 353  
11  
12 354 11. Sharling L, *et al.* Rifampin-Resistant Tuberculosis in The United States, 1998-2014.  
13  
14 *Clinical Infectious Diseases* 2019; ciz491. <https://doi.org/10.1093/cid/ciz491>  
15 355  
16  
17 356  
18  
19  
20  
21 357 12. Villegas L, *et al.* Prevalence, risk factors, and treatment outcomes of isoniazid and  
22  
23 358 rifampicin mono-resistant pulmonary tuberculosis in Lima, Peru. *PLOS ONE* 2016; 11:  
24  
25 359 e0152933.  
26  
27  
28 360  
29  
30 361 13. Gurumurthy P, *et al.* Malabsorption of rifampicin and isoniazid in HIV infected patients  
31  
32 362 with and without tuberculosis. *Clinical Infectious Disease* 2004; 38: 280–283.  
33  
34  
35 363  
36  
37  
38 364 14. Bifani P, *et al.* The evolution of drug resistance in *Mycobacterium tuberculosis*: from  
39  
40 365 a mono-rifampin-resistant cluster into increasingly multidrug-resistant variants in an  
41  
42 366 HIV-seropositive population. *Journal of Infectious Disease* 2008; 198: 90–94.  
43  
44  
45 367  
46  
47  
48 368 15. Jacobson KR, *et al.* Treatment outcomes of isoniazid-resistant tuberculosis patients,  
49  
50 369 Western Cape province, South Africa. *Clinical Infectious Disease* 2011; 53: 369–372.  
51  
52  
53 370  
54  
55  
56 371 16. Cattamanchi A, *et al.* Clinical characteristics and treatment outcomes of isoniazid  
57  
58 372 mono-resistant tuberculosis. *Clinical Infectious Disease* 2009; 48: 179–185.  
59  
60

1  
2  
3 373  
4

5 374 17. Fox L, *et al.* Comparison of isoniazid monoresistant tuberculosis with drug-susceptible  
6 tuberculosis and multidrug-resistant tuberculosis. *European Journal of Clinical*  
7 *Microbiology & Infectious Diseases* 2011; 30: 863-867.

8 375  
9 376  
10 377  
11

12 18. World Health Organization. Global Tuberculosis Report. 2013

13 a. [http://apps.who.int/iris/bitstream/10665/91355/1/9789241564656\\_eng.pdf](http://apps.who.int/iris/bitstream/10665/91355/1/9789241564656_eng.pdf)

14 378  
15 379  
16 380  
17

18 19. World Health Organization. Global Tuberculosis Report 2014.

19 a. [http://apps.who.int/iris/bitstream/10665/137094/1/9789241564809\\_eng.pdf](http://apps.who.int/iris/bitstream/10665/137094/1/9789241564809_eng.pdf)

20 381  
21 382  
22 383  
23

24 20. World Health Organization. Global Tuberculosis Report. 2015

25 a. [http://apps.who.int/iris/bitstream/10665/191102/1/9789241565059\\_eng.pdf](http://apps.who.int/iris/bitstream/10665/191102/1/9789241565059_eng.pdf)

26 384  
27 385  
28 386  
29 387  
30 388  
31 389  
32 390  
33 391  
34 392  
35 393  
36 394  
37 395  
38 396  
39 397  
40 398  
41 399  
42 400  
43 401  
44 402  
45 403  
46 404  
47 405  
48 406  
49 407  
50 408  
51 409  
52 410  
53 411  
54 412  
55 413  
56 414  
57 415  
58 416  
59 417  
60 418

21. O'Donnell MR, *et al.* Extensively drug-resistant tuberculosis in women, KwaZulu-Natal, South Africa. *Emerging Infectious Disease* 2011; 17: 1942–1945.

22. Cox HS, *et al.* Multidrug-resistant tuberculosis in Central Asia. *Emerging Infectious Disease* 2004; 10: 865–872.

- 1  
2  
3 393 23. Sonnenberg P, *et al.* How soon after infection with HIV does the risk of tuberculosis  
4  
5 394 start to increase? A retrospective cohort study in South African gold miners. *Journal of*  
6  
7 *Infectious Disease* 2005 15; 191: 150-158.  
8 395  
9  
10  
11 396  
12  
13  
14 397 24. Badri M, *et al.* Association between tuberculosis and HIV disease progression in a high  
15  
16 398 tuberculosis prevalence area. *International Journal of Tuberculosis and Lung Disease*  
17  
18 399 2001; 5: 225–232.  
20  
21  
22 400  
23  
24  
25 401 25. Badri M, *et al.* Effect of highly active antiretroviral therapy on incidence of tuberculosis  
26  
27 402 in South Africa: a cohort study. *Lancet* 2002; 359: 2059–2064.  
28  
29  
30 403  
31  
32  
33 404 26. Nanoo A, *et al.* Nationwide and regional incidence of microbiologically confirmed  
34  
35 405 pulmonary tuberculosis in South Africa, 2004–12: a time series analysis. *Lancet*  
36  
37 406 *Infectious Disease* 2015; 15: 1066–1076.  
38  
39  
40 407  
41  
42  
43 408 27. Schaaf HS, *et al.* Surveillance of anti-tuberculosis drug resistance among children from  
44  
45 409 the Western Cape Province of South Africa—an upward trend. *American Journal of*  
46  
47 410 *Public Health* 2009; 99: 1486-1490.  
48  
49  
50 411  
51  
52  
53 412 28. Zignol M, *et al.* Multidrug-resistant tuberculosis in children: evidence from global  
54  
55 413 surveillance. *European Respiratory Journal* 2013; 42: 701–707.  
56  
57  
58 414  
59  
60

- 1  
2  
3 415 29. Andrews JR, *et al.* Multidrug-resistant and extensively drug-resistant tuberculosis:  
4  
5 416 implications for the HIV epidemic and antiretroviral therapy rollout in South Africa.  
6  
7 417 *Journal of Infectious Disease* 2007; 196: S482-S490.  
8  
9  
10  
11 418  
12  
13  
14 419 30. Sanchez-Padilla E, *et al.* High prevalence of multidrug-resistant tuberculosis,  
15  
16 420 Swaziland, 2009–2010. *Emerging Infectious Diseases* 2012; 18: 29–37.  
17  
18  
19 421  
20  
21  
22  
23 422 31. Wallengren K, *et al.* Drug-resistant tuberculosis, KwaZulu-Natal, South Africa, 2001–  
24  
25 423 2007. *Emerging Infectious Diseases* 2011; 17: 1913-1916.  
26  
27 424  
28  
29 425 32. Bateman C. Tugela Ferry’s extensively drug-resistant tuberculosis – 10 years on.  
30  
31 426 *South African Medical Journal* 2015;105: 517-520.  
32  
33  
34 427  
35  
36  
37  
38 428 33. Lim JR, *et al.* Incidence and geographic distribution of extensively drug resistant  
39  
40 429 tuberculosis in KwaZulu-Natal province, South Africa. *PLOS ONE* 2015; 10:  
41  
42 430 e0132076.  
43  
44  
45 431  
46 432  
47  
48  
49 433  
50  
51

52  
53 **Table 1. LPA results between 2011 and 2014: RIF and INH mono-resistance\***

|                         | 2011  | 2012  | 2013  | 2014  |
|-------------------------|-------|-------|-------|-------|
| Total culture positives | 36644 | 30208 | 22568 | 14672 |
| Total cases LPA         | 31368 | 26513 | 18399 | 12279 |
| % of LPA done           | 85.6  | 87.8  | 81.5  | 83.7  |

|                                            |      |      |      |      |
|--------------------------------------------|------|------|------|------|
| <b>LPA Any INH Resistance</b>              | 6430 | 5548 | 4167 | 3045 |
| <b>LPA Any INH Resistance (%)</b>          | 20.5 | 20.9 | 22.7 | 24.8 |
| <b>LPA INH MR</b>                          | 845  | 1167 | 879  | 505  |
| <b>LPA INH MR (% of All INH Resistant)</b> | 13.8 | 21.0 | 21.1 | 17.1 |
| <b>LPA Any RIF Resistance</b>              | 6293 | 5013 | 3912 | 3134 |
| <b>LPA Any RIF Resistance (%)</b>          | 20.1 | 18.9 | 21.3 | 25.5 |
| <b>LPA RIF MR</b>                          | 953  | 767  | 676  | 667  |
| <b>LPA RIF MR (% of All RIF Resistant)</b> | 15.1 | 15.3 | 17.3 | 21.3 |

434 \*RIF, Rifampicin; INH, isoniazid; LPA, line probe assay; MR, mono-resistance

435

Table 2. Total TB positive, MDR and XDR cases per district for each year.

| District      | 2011            |      |      |     |      | 2012            |      |      |     |      | 2013            |      |      |     |      | 2014            |      |      |     |      |
|---------------|-----------------|------|------|-----|------|-----------------|------|------|-----|------|-----------------|------|------|-----|------|-----------------|------|------|-----|------|
|               | Total positives | MDR  | %    | XDR | %    | Total positives | MDR  | %    | XDR | %    | Total positives | MDR  | %    | XDR | %    | Total positives | MDR  | %    | XDR | %    |
| Amajuba       | 597             | 96   | 16.1 | 8   | 8.3  | 523             | 86   | 16.4 | 4   | 4.7  | 353             | 40   | 11.3 | 4   | 10.0 | 272             | 35   | 12.9 | 0   | 0.0  |
| Ethekwini     | 17519           | 2837 | 16.2 | 353 | 12.4 | 13453           | 2306 | 17.1 | 338 | 14.7 | 11118           | 2212 | 19.9 | 321 | 14.5 | 7404            | 1516 | 20.5 | 203 | 13.4 |
| Harry Gwala   | 776             | 124  | 16.0 | 5   | 4.0  | 752             | 191  | 25.4 | 13  | 6.8  | 526             | 186  | 35.4 | 4   | 2.2  | 396             | 142  | 35.9 | 12  | 8.5  |
| Ilembe        | 1704            | 269  | 15.8 | 9   | 3.3  | 1219            | 206  | 16.9 | 16  | 7.8  | 978             | 180  | 18.4 | 7   | 3.9  | 405             | 76   | 18.8 | 6   | 7.9  |
| Ugu           | 2172            | 542  | 25.0 | 37  | 6.8  | 2443            | 465  | 19.0 | 47  | 10.1 | 1655            | 388  | 23.4 | 34  | 8.8  | 1123            | 268  | 23.9 | 12  | 4.5  |
| Umgungundlovu | 3514            | 520  | 14.8 | 55  | 10.6 | 2858            | 532  | 18.6 | 57  | 10.7 | 1486            | 305  | 20.5 | 27  | 8.9  | 703             | 159  | 22.6 | 22  | 13.8 |
| Umkhanyakude  | 2230            | 732  | 32.8 | 5   | 0.7  | 1619            | 501  | 30.9 | 29  | 5.8  | 1214            | 422  | 34.8 | 15  | 3.6  | 945             | 341  | 36.1 | 19  | 5.6  |
| Umzinyathi    | 1478            | 334  | 22.6 | 134 | 40.1 | 1295            | 257  | 19.8 | 102 | 39.7 | 894             | 192  | 21.5 | 66  | 34.4 | 674             | 196  | 29.1 | 54  | 27.6 |
| Uthukela      | 1100            | 120  | 10.9 | 16  | 13.3 | 1023            | 111  | 10.9 | 13  | 11.7 | 545             | 71   | 13.0 | 6   | 8.5  | 261             | 55   | 21.1 | 12  | 21.8 |
| Uthungulu     | 2640            | 589  | 22.3 | 30  | 5.1  | 2737            | 590  | 21.6 | 41  | 6.9  | 2315            | 477  | 20.6 | 26  | 5.5  | 1178            | 294  | 25.0 | 12  | 4.1  |
| Zululand      | 2888            | 735  | 25.5 | 54  | 7.3  | 2259            | 662  | 29.3 | 37  | 5.6  | 1468            | 428  | 29.2 | 34  | 7.9  | 1168            | 362  | 31.0 | 28  | 7.7  |



|         |       |      |      |     |      |       |      |      |     |      |       |      |      |     |      |       |      |      |     |      |
|---------|-------|------|------|-----|------|-------|------|------|-----|------|-------|------|------|-----|------|-------|------|------|-----|------|
| Unknown | 26    | 3    | 11.5 | 0   | 0.0  | 27    | 5    | 18.5 | 0   | 0.0  | 16    | 1    | 6.3  | 0   | 0.0  | 143   | 62   | 43.4 | 9   | 14.5 |
| Total   | 36644 | 6901 | 18.8 | 706 | 10.2 | 30208 | 5912 | 19.6 | 697 | 11.8 | 22568 | 4902 | 21.7 | 544 | 11.1 | 14672 | 3506 | 23.9 | 389 | 11.1 |

436

437 \* MDR, multidrug-resistant; XDR, extensively drug-resistant; TB, tuberculosis

For peer review only

1  
2  
3  
4  
5  
6  
7  
8  
9  
10  
11  
12  
13  
14  
15  
16  
17  
18  
19  
20  
21  
22  
23  
24  
25  
26  
27  
28  
29  
30  
31  
32  
33  
34  
35  
36  
37  
38  
39  
40  
41  
42  
43  
44  
45  
46

1  
2  
3 438 Figure 1: Flow diagram showing the number of specimens received and the laboratory  
4  
5 439 procedures performed at the TB culture laboratory.  
6  
7

8  
9 440 Figure 2: TB culture specimens processed between 2011 and 2014. The figure shows the total  
10  
11 441 number of specimens received and the total number (and percentage) thereof that were positive.  
12  
13

14 442 Figure 3: Distribution of MDR-TB cases and proportions by gender. The number of MDR-TB  
15  
16 443 cases (represented by bars) by gender and the percentage (represented by lines) that is MDR-  
17  
18 444 TB of total positive cases by gender  
19  
20

21 445 Figure 4: Distribution of XDR-TB cases and proportions by gender. The number of XDR-TB  
22  
23 446 cases (represented by bars) by gender and the percentage (represented by lines) that is XDR-  
24  
25 447 TB of total positive cases by gender.  
26  
27  
28

29 448 Figure 5: The first panel depicts the percentage of MDR-TB cases per district for the period  
30  
31 449 2011 – 2014. The percentage of MDR-TB cases among TB cases diagnosed by culture between  
32  
33 450 2011 and 2014. The size of the circle represents the percentage. The second panel depicts the  
34  
35 451 percentage of XDR-TB cases per district for the period 2011 – 2014. The percentage of XDR-  
36  
37 452 TB cases among MDR-TB cases diagnosed by culture between 2011 and 2014. The map was  
38  
39 453 produced specifically for the purposes of this study, it is therefore not under copyright  
40  
41  
42  
43  
44  
45  
46  
47  
48  
49  
50  
51  
52  
53  
54  
55  
56  
57  
58  
59  
60

1  
2  
3  
4  
5  
6  
7  
8  
9  
10  
11  
12  
13  
14  
15  
16  
17  
18  
19  
20  
21  
22  
23  
24  
25  
26  
27  
28  
29  
30  
31  
32  
33  
34  
35  
36  
37  
38  
39  
40  
41  
42  
43  
44  
45  
46  
47  
48  
49  
50  
51  
52  
53  
54  
55  
56  
57  
58  
59  
60

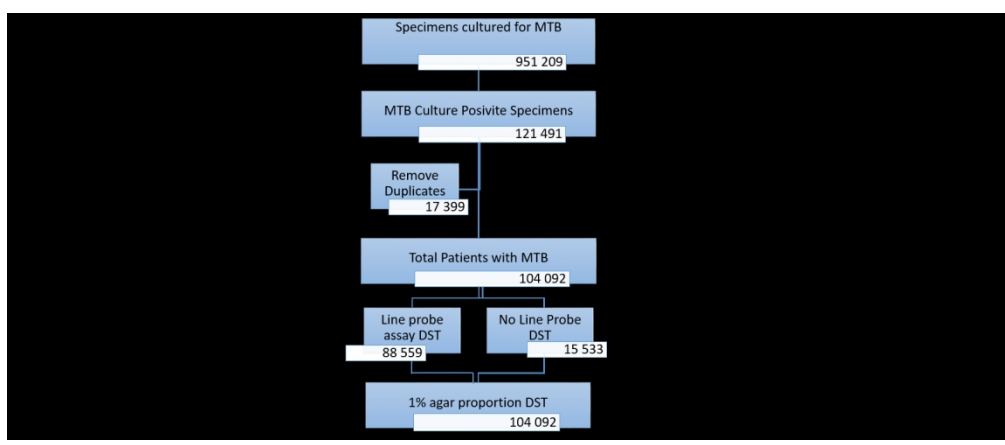

Flow diagram showing the number of specimens received and the laboratory procedures performed at the TB culture laboratory.

292x124mm (150 x 150 DPI)



29 TB culture specimens processed between 2011 and 2014. The figure shows the total number of specimens  
30 received and the total number (and percentage) thereof that were positive.

31 184x127mm (150 x 150 DPI)

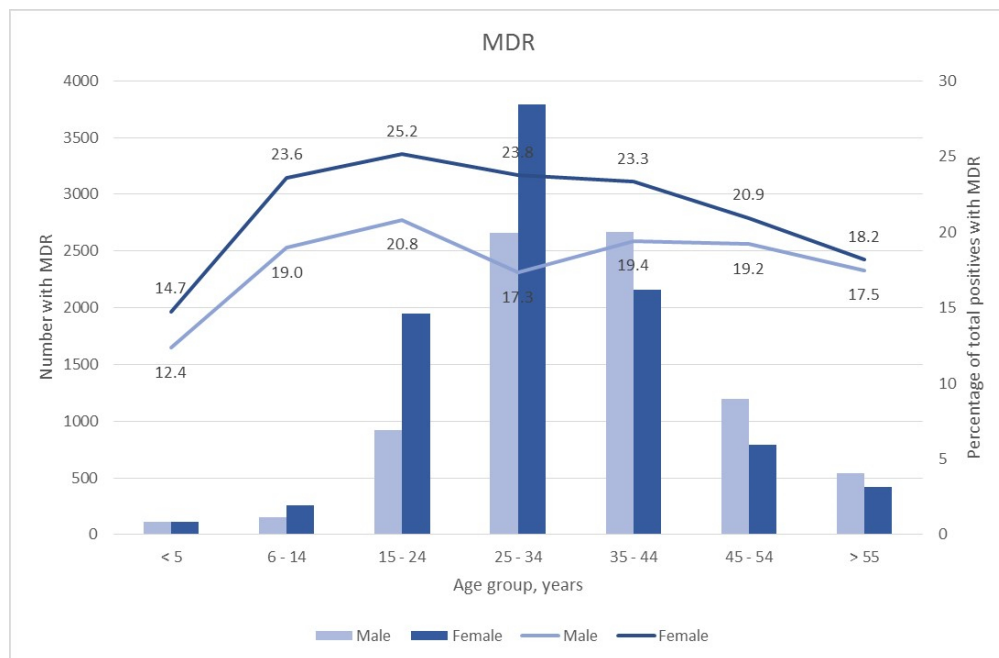

Distribution of MDR-TB cases and proportions by gender. The number of MDR-TB cases (represented by bars) by gender and the percentage (represented by lines) that is MDR-TB of total positive cases by gender

184x120mm (150 x 150 DPI)



Distribution of XDR-TB cases and proportions by gender. The number of XDR-TB cases (represented by bars) by gender and the percentage (represented by lines) that is XDR-TB of total positive cases by gender.

184x120mm (150 x 150 DPI)

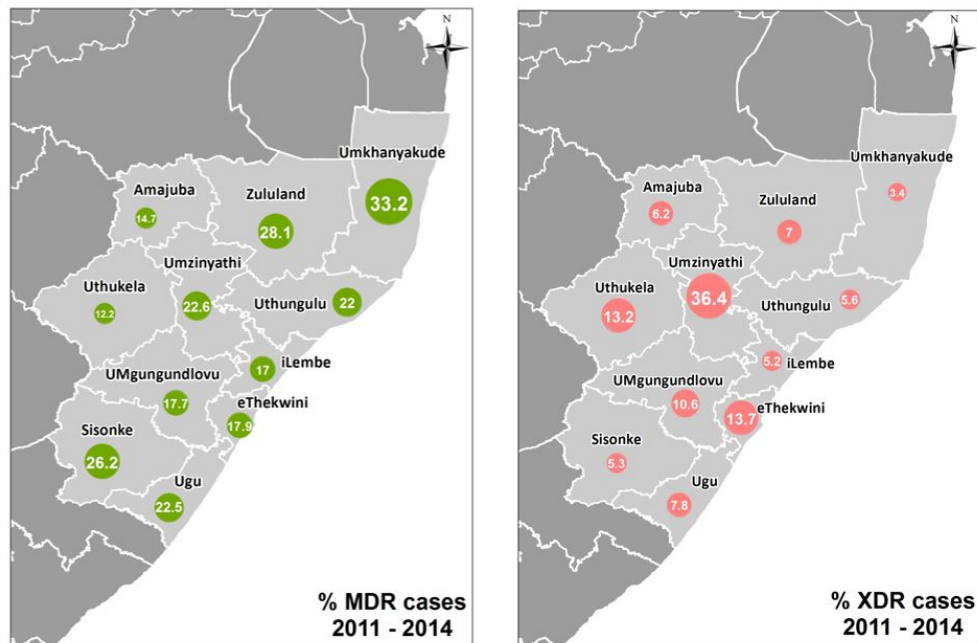

The first panel depicts the percentage of MDR-TB cases per district for the period 2011 – 2014. The percentage of MDR-TB cases among TB cases diagnosed by culture between 2011 and 2014. The size of the circle represents the percentage. The second panel depicts the percentage of XDR-TB cases per district for the period 2011 – 2014. The percentage of XDR-TB cases among MDR-TB cases diagnosed by culture between 2011 and 2014. The map was produced specifically for the purposes of this study, it is therefore not under copyright.

252x168mm (96 x 96 DPI)

## STROBE Statement—checklist of items that should be included in reports of observational studies

|                           | Item No. | Recommendation                                                                                                                                                                                | Page No. | Relevant text from manuscript                                                                                                                                                                                                                                                                                                                                                                                                                                                                                                                                                                                                                                                                                                                                                                                                                           |
|---------------------------|----------|-----------------------------------------------------------------------------------------------------------------------------------------------------------------------------------------------|----------|---------------------------------------------------------------------------------------------------------------------------------------------------------------------------------------------------------------------------------------------------------------------------------------------------------------------------------------------------------------------------------------------------------------------------------------------------------------------------------------------------------------------------------------------------------------------------------------------------------------------------------------------------------------------------------------------------------------------------------------------------------------------------------------------------------------------------------------------------------|
| <b>Title and abstract</b> | 1        | (a) Indicate the study's design with a commonly used term in the title or the abstract<br>(b) Provide in the abstract an informative and balanced summary of what was done and what was found | 2<br>2   | Retrospective observational study<br>We analysed data for all MTB cultures performed in the KwaZulu-Natal province between 2011 and 2014.<br>Our findings show increasing rifampicin mono-resistance and a substantial amount of INH mono-resistance.<br>Although DR-TB is widespread, HIV and migration influence its distribution.                                                                                                                                                                                                                                                                                                                                                                                                                                                                                                                    |
| <b>Introduction</b>       |          |                                                                                                                                                                                               |          |                                                                                                                                                                                                                                                                                                                                                                                                                                                                                                                                                                                                                                                                                                                                                                                                                                                         |
| Background/rationale      | 2        | Explain the scientific background and rationale for the investigation being reported                                                                                                          | 3-5      | Xpert replaced smear microscopy in the initial diagnosis of TB and all patients that do not demonstrate rifampicin resistance are assumed to have drug susceptible TB and therefore initiated on standard first line TB therapy. Thus, Xpert rifampicin susceptible cases do not get a culture, so isoniazid mono-resistance is not routinely investigated. TB culture and drug susceptibility testing (DST) is only indicated for patients that demonstrate rifampicin resistance on the Xpert, paucibacillary TB cases missed by Xpert (HIV infected, children and extra-pulmonary TB) and patients that fail TB treatment. Despite the recent changes in the diagnosis and management of TB, there are no studies that have assessed their impact on culture confirmed TB. The level of isoniazid mono-resistance that is not routinely investigated |



with current diagnostic methods is unknown, but instead these patients are getting rifampicin monotherapy during the continuous phase of their first line TB therapy which could potentially fuel drug resistance. On the other hand, patients with rifampicin mono-resistance can benefit from the addition of isoniazid in their treatment.

|            |   |                                                                  |   |                                                                                                                                                                                                    |
|------------|---|------------------------------------------------------------------|---|----------------------------------------------------------------------------------------------------------------------------------------------------------------------------------------------------|
| Objectives | 3 | State specific objectives, including any prespecified hypotheses | 5 | Evaluate the amount of rifampicin and isoniazid mono-resistance.<br>Describe the drug resistance patterns and distribution among different age groups, genders and districts in KZN, South Africa. |
|------------|---|------------------------------------------------------------------|---|----------------------------------------------------------------------------------------------------------------------------------------------------------------------------------------------------|

**Methods**

|              |   |                                                         |   |                                                                         |
|--------------|---|---------------------------------------------------------|---|-------------------------------------------------------------------------|
| Study design | 4 | Present key elements of study design early in the paper | 5 | The study is a retrospective observational study using laboratory data. |
|--------------|---|---------------------------------------------------------|---|-------------------------------------------------------------------------|

|         |   |                                                                                                                                 |   |                                                                                                                                                                                                                                                                                                                                                                                                                                                                                                                                                 |
|---------|---|---------------------------------------------------------------------------------------------------------------------------------|---|-------------------------------------------------------------------------------------------------------------------------------------------------------------------------------------------------------------------------------------------------------------------------------------------------------------------------------------------------------------------------------------------------------------------------------------------------------------------------------------------------------------------------------------------------|
| Setting | 5 | Describe the setting, locations, and relevant dates, including periods of recruitment, exposure, follow-up, and data collection | 5 | This retrospective observational study was conducted at the central academic laboratory of the KwaZulu-Natal province of South Africa using TB culture data for 2011-2014. KZN province is one of nine provinces in South Africa and its population of just over 10 million ranks second in the country. There are 77 public health hospitals (including 8 MDR-TB initiation sites) within 11 health districts. Provincial Mycobacterium tuberculosis culture and drug susceptibility testing are performed in one central academic laboratory. |
|---------|---|---------------------------------------------------------------------------------------------------------------------------------|---|-------------------------------------------------------------------------------------------------------------------------------------------------------------------------------------------------------------------------------------------------------------------------------------------------------------------------------------------------------------------------------------------------------------------------------------------------------------------------------------------------------------------------------------------------|

|               |   |                                                                                                                                                                                                                                                                                                                                               |   |                                                                                                                                                                                                    |
|---------------|---|-----------------------------------------------------------------------------------------------------------------------------------------------------------------------------------------------------------------------------------------------------------------------------------------------------------------------------------------------|---|----------------------------------------------------------------------------------------------------------------------------------------------------------------------------------------------------|
| .Participants | 6 | (a) <i>Cohort study</i> —Give the eligibility criteria, and the sources and methods of selection of participants. Describe methods of follow-up<br><i>Case-control study</i> —Give the eligibility criteria, and the sources and methods of case ascertainment and control selection. Give the rationale for the choice of cases and controls | 6 | The TB culture and drug susceptibility data was collected from the National Health Laboratory Service laboratory information system (LIS) which contains all electronic laboratory results. TB All |
|---------------|---|-----------------------------------------------------------------------------------------------------------------------------------------------------------------------------------------------------------------------------------------------------------------------------------------------------------------------------------------------|---|----------------------------------------------------------------------------------------------------------------------------------------------------------------------------------------------------|

|                              |    |                                                                                                                                                                                      |   |                                                                                                                                                                                                                                                                                                                                                                                                                                                                                                                                         |
|------------------------------|----|--------------------------------------------------------------------------------------------------------------------------------------------------------------------------------------|---|-----------------------------------------------------------------------------------------------------------------------------------------------------------------------------------------------------------------------------------------------------------------------------------------------------------------------------------------------------------------------------------------------------------------------------------------------------------------------------------------------------------------------------------------|
|                              |    | <i>Cross-sectional study</i> —Give the eligibility criteria, and the sources and methods of selection of participants                                                                |   | cultures performed in the provincial TB laboratory from 2011 till 2014 were included                                                                                                                                                                                                                                                                                                                                                                                                                                                    |
|                              |    | (b) <i>Cohort study</i> —For matched studies, give matching criteria and number of exposed and unexposed                                                                             |   |                                                                                                                                                                                                                                                                                                                                                                                                                                                                                                                                         |
|                              |    | <i>Case-control study</i> —For matched studies, give matching criteria and the number of controls per case                                                                           |   |                                                                                                                                                                                                                                                                                                                                                                                                                                                                                                                                         |
| Variables                    | 7  | Clearly define all outcomes, exposures, predictors, potential confounders, and effect modifiers. Give diagnostic criteria, if applicable                                             |   | Not applicable                                                                                                                                                                                                                                                                                                                                                                                                                                                                                                                          |
| Data sources/<br>measurement | 8* | For each variable of interest, give sources of data and details of methods of assessment (measurement). Describe comparability of assessment methods if there is more than one group | 6 | The data was collected from the National Health Laboratory Service laboratory information system (LIS) which contains all electronic laboratory results. In the absence of a unique identifier, duplicates were removed using MRN number (number given by the laboratory to specimens from the same patient) and demographic data (name, surname and date of birth). The results were stratified according to the health districts, age and gender. For the analysis of age, cases without recorded age or date of birth were excluded. |
| Bias                         | 9  | Describe any efforts to address potential sources of bias                                                                                                                            |   | Not Applicable                                                                                                                                                                                                                                                                                                                                                                                                                                                                                                                          |
| Study size                   | 10 | Explain how the study size was arrived at                                                                                                                                            |   | Not Applicable: All results included                                                                                                                                                                                                                                                                                                                                                                                                                                                                                                    |

Continued on next page

|    |                        |     |                                                                                                                                                                                                   |          |                                                                                                                                                                                                                                                                                                                                                                                                               |
|----|------------------------|-----|---------------------------------------------------------------------------------------------------------------------------------------------------------------------------------------------------|----------|---------------------------------------------------------------------------------------------------------------------------------------------------------------------------------------------------------------------------------------------------------------------------------------------------------------------------------------------------------------------------------------------------------------|
| 1  |                        |     |                                                                                                                                                                                                   |          |                                                                                                                                                                                                                                                                                                                                                                                                               |
| 2  | Quantitative variables | 11  | Explain how quantitative variables were handled in the analyses. If applicable, describe which groupings were chosen and why                                                                      | 6        | Data was described using frequencies and proportions.                                                                                                                                                                                                                                                                                                                                                         |
| 3  |                        |     |                                                                                                                                                                                                   |          |                                                                                                                                                                                                                                                                                                                                                                                                               |
| 4  | Statistical methods    | 12  | (a) Describe all statistical methods, including those used to control for confounding                                                                                                             | 6        | Continuous data was described using means, standard deviations (sd) and 95% confidence intervals (95% CI). Categorical outcomes were tested using the chi-squared test. Log binomial regression of MDR and XDR-TB was performed using sex, age group, district and year as predictors to estimate the adjusted relative risk ratios. Data was analysed using Stata 14 (StataCorp., College Station, TX, USA). |
| 5  |                        |     |                                                                                                                                                                                                   |          |                                                                                                                                                                                                                                                                                                                                                                                                               |
| 6  |                        |     |                                                                                                                                                                                                   |          |                                                                                                                                                                                                                                                                                                                                                                                                               |
| 7  |                        |     |                                                                                                                                                                                                   |          |                                                                                                                                                                                                                                                                                                                                                                                                               |
| 8  |                        |     |                                                                                                                                                                                                   |          |                                                                                                                                                                                                                                                                                                                                                                                                               |
| 9  |                        |     |                                                                                                                                                                                                   |          |                                                                                                                                                                                                                                                                                                                                                                                                               |
| 10 |                        |     |                                                                                                                                                                                                   |          |                                                                                                                                                                                                                                                                                                                                                                                                               |
| 11 |                        |     |                                                                                                                                                                                                   |          |                                                                                                                                                                                                                                                                                                                                                                                                               |
| 12 |                        |     |                                                                                                                                                                                                   |          |                                                                                                                                                                                                                                                                                                                                                                                                               |
| 13 |                        |     |                                                                                                                                                                                                   |          |                                                                                                                                                                                                                                                                                                                                                                                                               |
| 14 |                        |     |                                                                                                                                                                                                   |          |                                                                                                                                                                                                                                                                                                                                                                                                               |
| 15 |                        |     |                                                                                                                                                                                                   |          |                                                                                                                                                                                                                                                                                                                                                                                                               |
| 16 |                        |     |                                                                                                                                                                                                   |          |                                                                                                                                                                                                                                                                                                                                                                                                               |
| 17 |                        |     |                                                                                                                                                                                                   |          |                                                                                                                                                                                                                                                                                                                                                                                                               |
| 18 |                        |     |                                                                                                                                                                                                   |          |                                                                                                                                                                                                                                                                                                                                                                                                               |
| 19 |                        |     |                                                                                                                                                                                                   |          |                                                                                                                                                                                                                                                                                                                                                                                                               |
| 20 |                        |     | (b) Describe any methods used to examine subgroups and interactions                                                                                                                               |          |                                                                                                                                                                                                                                                                                                                                                                                                               |
| 21 |                        |     | (c) Explain how missing data were addressed                                                                                                                                                       |          |                                                                                                                                                                                                                                                                                                                                                                                                               |
| 22 |                        |     | (d) Cohort study—If applicable, explain how loss to follow-up was addressed                                                                                                                       |          |                                                                                                                                                                                                                                                                                                                                                                                                               |
| 23 |                        |     | Case-control study—If applicable, explain how matching of cases and controls was addressed                                                                                                        |          |                                                                                                                                                                                                                                                                                                                                                                                                               |
| 24 |                        |     | Cross-sectional study—If applicable, describe analytical methods taking account of sampling strategy                                                                                              |          |                                                                                                                                                                                                                                                                                                                                                                                                               |
| 25 |                        |     | (e) Describe any sensitivity analyses                                                                                                                                                             |          |                                                                                                                                                                                                                                                                                                                                                                                                               |
| 26 |                        |     |                                                                                                                                                                                                   |          |                                                                                                                                                                                                                                                                                                                                                                                                               |
| 27 |                        |     |                                                                                                                                                                                                   |          |                                                                                                                                                                                                                                                                                                                                                                                                               |
| 28 |                        |     |                                                                                                                                                                                                   |          |                                                                                                                                                                                                                                                                                                                                                                                                               |
| 29 | <b>Results</b>         |     |                                                                                                                                                                                                   |          |                                                                                                                                                                                                                                                                                                                                                                                                               |
| 30 | Participants           | 13* | (a) Report numbers of individuals at each stage of study—eg numbers potentially eligible, examined for eligibility, confirmed eligible, included in the study, completing follow-up, and analysed | Figure 1 | A flow diagram is used to report number of specimens and individuals at each stage                                                                                                                                                                                                                                                                                                                            |
| 31 |                        |     |                                                                                                                                                                                                   |          |                                                                                                                                                                                                                                                                                                                                                                                                               |
| 32 |                        |     |                                                                                                                                                                                                   |          |                                                                                                                                                                                                                                                                                                                                                                                                               |
| 33 |                        |     |                                                                                                                                                                                                   |          |                                                                                                                                                                                                                                                                                                                                                                                                               |
| 34 |                        |     | (b) Give reasons for non-participation at each stage                                                                                                                                              |          |                                                                                                                                                                                                                                                                                                                                                                                                               |
| 35 |                        |     | (c) Consider use of a flow diagram                                                                                                                                                                |          |                                                                                                                                                                                                                                                                                                                                                                                                               |
| 36 | Descriptive data       | 14* | (a) Give characteristics of study participants (eg demographic, clinical, social) and information on exposures and potential confounders                                                          | 7        | -Between 2011 and 2014, a total of 951 209 specimens were cultured for MTB in KwaZulu-Natal                                                                                                                                                                                                                                                                                                                   |
| 37 |                        |     |                                                                                                                                                                                                   |          |                                                                                                                                                                                                                                                                                                                                                                                                               |
| 38 |                        |     |                                                                                                                                                                                                   |          |                                                                                                                                                                                                                                                                                                                                                                                                               |
| 39 |                        |     |                                                                                                                                                                                                   |          |                                                                                                                                                                                                                                                                                                                                                                                                               |
| 40 |                        |     |                                                                                                                                                                                                   |          |                                                                                                                                                                                                                                                                                                                                                                                                               |
| 41 |                        |     |                                                                                                                                                                                                   |          |                                                                                                                                                                                                                                                                                                                                                                                                               |
| 42 |                        |     |                                                                                                                                                                                                   |          |                                                                                                                                                                                                                                                                                                                                                                                                               |
| 43 |                        |     |                                                                                                                                                                                                   |          |                                                                                                                                                                                                                                                                                                                                                                                                               |
| 44 |                        |     |                                                                                                                                                                                                   |          |                                                                                                                                                                                                                                                                                                                                                                                                               |
| 45 |                        |     |                                                                                                                                                                                                   |          |                                                                                                                                                                                                                                                                                                                                                                                                               |
| 46 |                        |     |                                                                                                                                                                                                   |          |                                                                                                                                                                                                                                                                                                                                                                                                               |

|              |     |                                                                                                                                                                                                              |     |                                                                                                                                           |
|--------------|-----|--------------------------------------------------------------------------------------------------------------------------------------------------------------------------------------------------------------|-----|-------------------------------------------------------------------------------------------------------------------------------------------|
|              |     |                                                                                                                                                                                                              |     | -After removing duplicates, there were 36644, 30208, 22568, 14672 culture confirmed cases of TB in 2011, 2012, 2013 and 2014 respectively |
|              |     | (b) Indicate number of participants with missing data for each variable of interest                                                                                                                          |     |                                                                                                                                           |
|              |     | (c) <i>Cohort study</i> —Summarise follow-up time (eg, average and total amount)                                                                                                                             |     |                                                                                                                                           |
| Outcome data | 15* | <i>Cohort study</i> —Report numbers of outcome events or summary measures over time                                                                                                                          |     | Not Applicable                                                                                                                            |
|              |     | <i>Case-control study</i> —Report numbers in each exposure category, or summary measures of exposure                                                                                                         |     |                                                                                                                                           |
|              |     | <i>Cross-sectional study</i> —Report numbers of outcome events or summary measures                                                                                                                           |     |                                                                                                                                           |
| Main results | 16  | (a) Give unadjusted estimates and, if applicable, confounder-adjusted estimates and their precision (eg, 95% confidence interval). Make clear which confounders were adjusted for and why they were included | 7-8 | Standard deviations and 95% confidence intervals are given                                                                                |
|              |     | (b) Report category boundaries when continuous variables were categorized                                                                                                                                    |     |                                                                                                                                           |
|              |     | (c) If relevant, consider translating estimates of relative risk into absolute risk for a meaningful time period                                                                                             |     |                                                                                                                                           |

Continued on next page

|    |                   |    |                                                                                                                                                                            |       |                                         |
|----|-------------------|----|----------------------------------------------------------------------------------------------------------------------------------------------------------------------------|-------|-----------------------------------------|
| 1  |                   |    |                                                                                                                                                                            |       |                                         |
| 2  | Other analyses    | 17 | Report other analyses done—eg analyses of subgroups and interactions, and sensitivity analyses                                                                             |       |                                         |
| 3  |                   |    |                                                                                                                                                                            |       |                                         |
| 4  | <b>Discussion</b> |    |                                                                                                                                                                            |       |                                         |
| 5  | Key results       | 18 | Summarise key results with reference to study objectives                                                                                                                   | 8-12  | Key findings:                           |
| 6  |                   |    |                                                                                                                                                                            |       | -Increasing mono-resistance             |
| 7  |                   |    |                                                                                                                                                                            |       | highlight the importance of testing     |
| 8  |                   |    |                                                                                                                                                                            |       | for INH resistance in all patients      |
| 9  |                   |    |                                                                                                                                                                            |       | with Xpert rifampicin resistance        |
| 10 |                   |    |                                                                                                                                                                            |       | -Significant INH mono-resistance        |
| 11 |                   |    |                                                                                                                                                                            |       | that is currently missed in the initial |
| 12 |                   |    |                                                                                                                                                                            |       | diagnosis of TB.                        |
| 13 |                   |    |                                                                                                                                                                            |       | - The majority of DR-TB cases           |
| 14 |                   |    |                                                                                                                                                                            |       | were found between the ages of 15       |
| 15 |                   |    |                                                                                                                                                                            |       | and 44 years, which is the same age     |
| 16 |                   |    |                                                                                                                                                                            |       | group that is known to have the         |
| 17 |                   |    |                                                                                                                                                                            |       | highest HIV prevalence                  |
| 18 |                   |    |                                                                                                                                                                            |       | -DR TB is high in areas bordering       |
| 19 |                   |    |                                                                                                                                                                            |       | high DR TB regions, thus migration      |
| 20 |                   |    |                                                                                                                                                                            |       | may influence resistance patterns.      |
| 21 |                   |    |                                                                                                                                                                            |       |                                         |
| 22 |                   |    |                                                                                                                                                                            |       |                                         |
| 23 |                   |    |                                                                                                                                                                            |       |                                         |
| 24 |                   |    |                                                                                                                                                                            |       |                                         |
| 25 | Limitations       | 19 | Discuss limitations of the study, taking into account sources of potential bias or imprecision. Discuss both direction and magnitude of any potential bias                 | 13    | -Retrospective design; the accuracy     |
| 26 |                   |    |                                                                                                                                                                            |       | of the data is dependent on             |
| 27 |                   |    |                                                                                                                                                                            |       | available information.                  |
| 28 |                   |    |                                                                                                                                                                            |       | - Absence of unique patient             |
| 29 |                   |    |                                                                                                                                                                            |       | identifiers: affects the accuracy of    |
| 30 |                   |    |                                                                                                                                                                            |       | the data as the removal of              |
| 31 |                   |    |                                                                                                                                                                            |       | duplicates is imperfect                 |
| 32 |                   |    |                                                                                                                                                                            |       | - Could not differentiate between       |
| 33 |                   |    |                                                                                                                                                                            |       | new and known MDR-TB patients           |
| 34 |                   |    |                                                                                                                                                                            |       | - Xpert MTB/RIF data was not            |
| 35 |                   |    |                                                                                                                                                                            |       | available for comparison                |
| 36 |                   |    |                                                                                                                                                                            |       |                                         |
| 37 |                   |    |                                                                                                                                                                            |       |                                         |
| 38 |                   |    |                                                                                                                                                                            |       |                                         |
| 39 | Interpretation    | 20 | Give a cautious overall interpretation of results considering objectives, limitations, multiplicity of analyses, results from similar studies, and other relevant evidence | 12-13 | Our findings highlight the              |
| 40 |                   |    |                                                                                                                                                                            |       | importance of DR-TB diagnostic          |
| 41 |                   |    |                                                                                                                                                                            |       |                                         |
| 42 |                   |    |                                                                                                                                                                            |       |                                         |

algorithms that include both rifampicin and isoniazid DST in the initial testing. Early detection of RMR will allow addition of isoniazid in the treatment regimen, while detection of IMR will prevent rifampicin monotherapy later on during the continuation phase of treatment which has been associated with development of rifampicin resistance. This will also allow us to have a clearer estimate of MDR-TB cases. HIV and migration play a significant role in the distribution of DR-TB in this region, therefore TB control measures that address these factors may have impact on DR-TB level.

|                          |    |                                                                                                                                                               |    |                                                  |
|--------------------------|----|---------------------------------------------------------------------------------------------------------------------------------------------------------------|----|--------------------------------------------------|
| Generalisability         | 21 | Discuss the generalisability (external validity) of the study results                                                                                         | 13 | Conclusion applies to a wide variety of settings |
| <b>Other information</b> |    |                                                                                                                                                               |    |                                                  |
| Funding                  | 22 | Give the source of funding and the role of the funders for the present study and, if applicable, for the original study on which the present article is based |    | None                                             |

\*Give information separately for cases and controls in case-control studies and, if applicable, for exposed and unexposed groups in cohort and cross-sectional studies.

**Note:** An Explanation and Elaboration article discusses each checklist item and gives methodological background and published examples of transparent reporting. The STROBE checklist is best used in conjunction with this article (freely available on the Web sites of PLoS Medicine at <http://www.plosmedicine.org/>, Annals of Internal Medicine at <http://www.annals.org/>, and Epidemiology at <http://www.epidem.com/>). Information on the STROBE Initiative is available at [www.strobe-statement.org](http://www.strobe-statement.org).
